# Supplementary material for: Transposon-insertion sequencing screens unveil requirements for EHEC growth and intestinal colonization
Source: PLoS Pathog. 2019 Aug 12;15(8):e1007652. doi: 10.1371/journal.ppat.1007652 (PMC6705877; doi:10.1371/journal.ppat.1007652)
Supplement: S4 Table — (XLSX) [file ppat.1007652.s009.xlsx]

## Sheet: S4 Table
S4 Table. EL-ARTIST analysis of E. coli K12 MG1655
Position	Locus Tag	Replicon	Class - General	Class - Specific	# TA Sites	% Sites Hit	Reads per Site Hit	EL-ARTIST Call	Symbol	Gene Function	Protein ID	Call in Keio Collection			Summary
1	b0001	chromosome	Protein_Coding	protein_coding	4	75	35	Neutral	thrL	thr operon leader peptide	WP_001386572.1	Not Essential			Chromosome	Neutral	Regional	Underrepresented
2	b0002	chromosome	Protein_Coding	protein_coding	86	73.3	42.1429	Neutral	thrA	Bifunctional aspartokinase/homoserine dehydrogenase 1	WP_001264707.1	Not Essential			Protein Coding	3122	275	722
3	b0003	chromosome	Protein_Coding	protein_coding	31	71	22.5	Neutral	thrB	homoserine kinase	WP_000241662.1	Not Essential			Pseudogene	145	21	27
4	b0004	chromosome	Protein_Coding	protein_coding	34	50	31.8824	Neutral	thrC	L-threonine synthase	WP_000781074.1	Not Essential			RNA	130	4	37
5	b0005	chromosome	Protein_Coding	protein_coding	14	85.7	42.6667	Neutral	yaaX	DUF2502 family putative periplasmic protein	WP_000738719.1	Not Essential
6	b0006	chromosome	Protein_Coding	protein_coding	31	64.5	48.8	Neutral	yaaA	peroxide resistance protein, lowers intracellular iron	WP_000906197.1	Not Essential			Total	3397	300	786
7	b0007	chromosome	Protein_Coding	protein_coding	60	70	45.619	Neutral	yaaJ	putative transporter	WP_001112606.1	Not Essential
8	b0008	chromosome	Protein_Coding	protein_coding	39	69.2	29.037	Neutral	talB	transaldolase B	WP_000130185.1	Not Essential
9	b0009	chromosome	Protein_Coding	protein_coding	23	60.9	34.0714	Neutral	mog	molybdochelatase incorporating molybdenum into molybdopterin	WP_001295414.1	Not Essential
10	b0010	chromosome	Protein_Coding	protein_coding	21	81	18.9412	Neutral	satP	succinate-acetate transporter	WP_000528538.1	Not Essential
11	b0011	chromosome	Protein_Coding	protein_coding	25	72	40	Neutral	yaaW	UPF0174 family protein	WP_001102367.1	Not Essential
12	b0013	chromosome	Protein_Coding	protein_coding	19	68.4	21	Neutral	yaaI	UPF0412 family protein	WP_000843565.1	Not Essential
13	b0014	chromosome	Protein_Coding	protein_coding	71	1.4	1	Underrepresented	dnaK	chaperone Hsp70, with co-chaperone DnaJ	WP_000516135.1	Not Essential
14	b0015	chromosome	Protein_Coding	protein_coding	33	36.4	17.9167	Neutral	dnaJ	chaperone Hsp40, DnaK co-chaperone	WP_001118476.1	Not Essential
15	b0016	chromosome	Protein_Coding	protein_coding	46	84.8	31.4615	Neutral	insL1	IS186 transposase	WP_001300563.1	Not Essential
16	b0018	chromosome	Protein_Coding	protein_coding	10	70	49.2857	Neutral	mokC	regulatory protein for HokC, overlaps CDS of hokC	WP_000935262.1	Not Essential
17	b4413	chromosome	RNA	antisense_RNA	3	100	59.3333	Neutral	sokC	sRNA antisense regulator blocking mokC, and hence hokC, translation	---	Not Essential
18	b0019	chromosome	Protein_Coding	protein_coding	54	0	0	Underrepresented	nhaA	sodium-proton antiporter	WP_000681354.1	Not Essential
19	b0020	chromosome	Protein_Coding	protein_coding	45	71.1	33.125	Neutral	nhaR	transcriptional activator of nhaA	WP_000062890.1	Not Essential
20	b0021	chromosome	Protein_Coding	protein_coding	22	86.4	24	Neutral	insB1	IS1 transposase B	WP_001119362.1	Not Essential
21	b0022	chromosome	Protein_Coding	protein_coding	8	75	18	Neutral	insA	IS1 repressor TnpA	WP_000179213.1	Not Essential
22	b0023	chromosome	Protein_Coding	protein_coding	14	7.1	9	Underrepresented	rpsT	30S ribosomal subunit protein S20	WP_001274021.1	Not Essential
23	b0024	chromosome	Protein_Coding	protein_coding	10	30	31.6667	Underrepresented	yaaY	uncharacterized protein	WP_001300728.1	Not Essential
24	b0025	chromosome	Protein_Coding	protein_coding	39	2.6	3	Underrepresented	ribF	bifunctional riboflavin kinase/FAD synthetase	WP_000767329.1	Essential
25	b0026	chromosome	Protein_Coding	protein_coding	82	0	0	Underrepresented	ileS	isoleucyl-tRNA synthetase	WP_001286857.1	Essential
26	b0027	chromosome	Protein_Coding	protein_coding	24	4.2	6	Underrepresented	lspA	prolipoprotein signal peptidase (signal peptidase II)	WP_000083372.1	Essential
27	b0028	chromosome	Protein_Coding	protein_coding	13	30.8	8.75	Underrepresented	fkpB	FKBP-type peptidyl-prolyl cis-trans isomerase (rotamase)	WP_000004655.1	Not Essential
28	b0029	chromosome	Protein_Coding	protein_coding	30	0	0	Underrepresented	ispH	4-hydroxy-3-methylbut-2-enyl diphosphate reductase, 4Fe-4S protein	WP_001166395.1	Essential
29	b0030	chromosome	Protein_Coding	protein_coding	32	50	44.625	Regional	rihC	ribonucleoside hydrolase 3	WP_001239142.1	Not Essential
30	b0031	chromosome	Protein_Coding	protein_coding	32	0	0	Underrepresented	dapB	dihydrodipicolinate reductase	WP_000543604.1	Essential
31	b0032	chromosome	Protein_Coding	protein_coding	43	41.9	12.5556	Neutral	carA	carbamoyl phosphate synthetase small subunit, glutamine amidotransferase	WP_000597260.1	Not Essential
32	b0033	chromosome	Protein_Coding	protein_coding	100	37	26.2432	Regional	carB	carbamoyl-phosphate synthase large subunit	WP_001126348.1	Not Essential
33	b0034	chromosome	Protein_Coding	protein_coding	24	58.3	9.92857	Neutral	caiF	cai operon transcriptional activator	WP_000333125.1	Not Essential
34	b0035	chromosome	Protein_Coding	protein_coding	20	80	77.0625	Neutral	caiE	stimulator of CaiD and CaiB enzyme activities	WP_000122871.1	Not Essential
35	b0036	chromosome	Protein_Coding	protein_coding	25	40	30.2	Regional	caiD	carnitinyl-CoA dehydratase	WP_001295419.1	Not Essential
36	b0037	chromosome	Protein_Coding	protein_coding	64	54.7	40.9429	Neutral	caiC	putative crotonobetaine/carnitine-CoA ligase	WP_001350478.1	Not Essential
37	b0038	chromosome	Protein_Coding	protein_coding	50	64	55.0625	Neutral	caiB	crotonobetainyl CoA:carnitine CoA transferase	WP_000349936.1	Not Essential
38	b0039	chromosome	Protein_Coding	protein_coding	44	50	43.7273	Neutral	caiA	crotonobetaine reductase subunit II, FAD-binding	WP_000347117.1	Not Essential
39	b0040	chromosome	Protein_Coding	protein_coding	69	69.6	43.875	Neutral	caiT	putative transporter	WP_000787103.1	Not Essential
40	b0041	chromosome	Protein_Coding	protein_coding	26	69.2	23.6111	Neutral	fixA	anaerobic carnitine reduction putative electron transfer flavoprotein subunit	WP_000692204.1	Not Essential
41	b0042	chromosome	Protein_Coding	protein_coding	29	58.6	39.0588	Neutral	fixB	putative electron transfer flavoprotein, NAD/FAD-binding domain and ETFP adenine nucleotide-binding domain-like protein	WP_001091499.1	Not Essential
42	b0043	chromosome	Protein_Coding	protein_coding	38	68.4	49.3846	Neutral	fixC	putative oxidoreductase	WP_001287715.1	Not Essential
43	b0044	chromosome	Protein_Coding	protein_coding	6	50	90.3333	Neutral	fixX	putative 4Fe-4S ferredoxin-type protein	WP_000203741.1	Not Essential
44	b0045	chromosome	Protein_Coding	protein_coding	50	60	37.7667	Neutral	yaaU	putative MFS sugar transporter; membrane protein	WP_001183198.1	Not Essential
45	b0046	chromosome	Protein_Coding	protein_coding	17	76.5	41.9231	Neutral	kefF	potassium-efflux system ancillary protein for KefC, glutathione-regulated; quinone oxidoreductase, FMN-dependent	WP_000600725.1	Not Essential
46	b0047	chromosome	Protein_Coding	protein_coding	54	72.2	32.7949	Neutral	kefC	potassium:proton antiporter	WP_000377098.1	Not Essential
47	b0048	chromosome	Protein_Coding	protein_coding	20	0	0	Underrepresented	folA	dihydrofolate reductase	WP_000624375.1	Essential
48	b0049	chromosome	Protein_Coding	protein_coding	37	5.4	6.5	Underrepresented	apaH	diadenosine tetraphosphatase	WP_000257192.1	Not Essential
49	b0050	chromosome	Protein_Coding	protein_coding	15	86.7	93.3846	Neutral	apaG	protein associated with Co2+ and Mg2+ efflux	WP_000610901.1	Not Essential
50	b0051	chromosome	Protein_Coding	protein_coding	31	32.3	19.4	Neutral	rsmA	16S rRNA m(6)A1518, m(6)A1519 dimethyltransferase, SAM-dependent	WP_001065381.1	Not Essential
51	b0052	chromosome	Protein_Coding	protein_coding	35	62.9	44.5	Neutral	pdxA	4-hydroxy-L-threonine phosphate dehydrogenase, NAD-dependent	WP_000241277.1	Not Essential
52	b0053	chromosome	Protein_Coding	protein_coding	38	2.6	14	Underrepresented	surA	peptidyl-prolyl cis-trans isomerase (PPIase)	WP_000800457.1	Not Essential
53	b0054	chromosome	Protein_Coding	protein_coding	133	0.8	93	Underrepresented	lptD	LPS assembly OM complex LptDE, beta-barrel component	WP_000746151.1	Essential
54	b0055	chromosome	Protein_Coding	protein_coding	27	74.1	34.05	Neutral	djlA	membrane-anchored DnaK co-chaperone, DNA-binding protein	WP_001200579.1	Not Essential
55	b4659	chromosome	Pseudogene	pseudogene	59	62.7	22.7568	Neutral	yabP	---	---	Not Essential
56	b0058	chromosome	Protein_Coding	protein_coding	27	59.3	28.25	Neutral	rluA	dual specificity 23S rRNA pseudouridine(746), tRNA pseudouridine(32) synthase, SAM-dependent	WP_000525176.1	Not Essential
57	b0059	chromosome	Protein_Coding	protein_coding	95	57.9	38.1273	Neutral	rapA	RNA polymerase remodeling/recycling factor ATPase; RNA polymerase-associated, ATP-dependent RNA translocase	WP_001117011.1	Not Essential
58	b0060	chromosome	Protein_Coding	protein_coding	88	70.5	57.5484	Neutral	polB	DNA polymerase II	WP_000035670.1	Not Essential
59	b0061	chromosome	Protein_Coding	protein_coding	28	75	45.8571	Neutral	araD	L-ribulose-5-phosphate 4-epimerase	WP_000888666.1	Not Essential
60	b0062	chromosome	Protein_Coding	protein_coding	43	55.8	37.125	Neutral	araA	L-arabinose isomerase	WP_000151748.1	Not Essential
61	b0063	chromosome	Protein_Coding	protein_coding	44	61.4	43.5926	Neutral	araB	L-ribulokinase	WP_000951856.1	Not Essential
62	b0064	chromosome	Protein_Coding	protein_coding	35	54.3	21.7895	Neutral	araC	ara regulon transcriptional activator; autorepressor	WP_001300811.1	Not Essential
63	b0065	chromosome	Protein_Coding	protein_coding	27	59.3	22.5	Neutral	yabI	DedA family inner membrane protein	WP_001148390.1	Not Essential
64	b0066	chromosome	Protein_Coding	protein_coding	27	55.6	40.3333	Neutral	thiQ	thiamine/thiamine pyrophosphate ABC transporter ATPase	WP_000916281.1	Not Essential
65	b0067	chromosome	Protein_Coding	protein_coding	50	64	55.875	Neutral	thiP	thiamine/thiamine pyrophosphate ABC transporter permease	WP_000235721.1	Not Essential
66	b0068	chromosome	Protein_Coding	protein_coding	33	60.6	23.25	Neutral	thiB	thiamine/thiamine pyrophosphate/thiamine monophosphate ABC transporter periplasmic binding protein	WP_001301364.1	Not Essential
67	b0069	chromosome	Protein_Coding	protein_coding	51	66.7	28.2941	Neutral	sgrR	transcriptional DNA-binding transcriptional activator of sgrS sRNA	WP_001138624.1	Not Essential
68	b4662	chromosome	Protein_Coding	protein_coding	5	60	23.6667	Neutral	sgrT	inhibitor of glucose uptake	WP_001248770.1	Not Essential
69	b0070	chromosome	Protein_Coding	protein_coding	74	68.9	41.4314	Neutral	setA	broad specificity sugar efflux system	WP_000637847.1	Not Essential
70	b0071	chromosome	Protein_Coding	protein_coding	19	63.2	42.4167	Neutral	leuD	3-isopropylmalate dehydratase small subunit	WP_000818228.1	Not Essential
71	b0072	chromosome	Protein_Coding	protein_coding	44	56.8	37.36	Neutral	leuC	3-isopropylmalate dehydratase large subunit	WP_001140652.1	Not Essential
72	b0073	chromosome	Protein_Coding	protein_coding	38	71.1	67.5926	Neutral	leuB	3-isopropylmalate dehydrogenase, NAD(+)-dependent	WP_000042353.1	Not Essential
73	b0074	chromosome	Protein_Coding	protein_coding	61	75.4	44.6087	Neutral	leuA	2-isopropylmalate synthase	WP_000082850.1	Not Essential
74	b0075	chromosome	Protein_Coding	protein_coding	7	71.4	49.8	Neutral	leuL	leu operon leader peptide	WP_001300467.1	Not Essential
75	b0076	chromosome	Protein_Coding	protein_coding	50	62	37.9677	Neutral	leuO	global transcription factor	WP_001115472.1	Not Essential
76	b0077	chromosome	Protein_Coding	protein_coding	69	68.1	45.4681	Neutral	ilvI	acetolactate synthase 3 large subunit	WP_001295534.1	Not Essential
77	b0078	chromosome	Protein_Coding	protein_coding	21	71.4	38.7333	Neutral	ilvH	acetolactate synthase 3, small subunit, valine-sensitive	WP_001300383.1	Not Essential
78	b0080	chromosome	Protein_Coding	protein_coding	32	3.1	25	Underrepresented	cra	transcriptional repressor-activator for carbon metabolism	WP_000762401.1	Not Essential
79	b0081	chromosome	Protein_Coding	protein_coding	17	29.4	43.4	Regional	mraZ	RsmH methytransferase inhibitor	WP_001295533.1	Not Essential
80	b0082	chromosome	Protein_Coding	protein_coding	31	3.2	1	Underrepresented	rsmH	16S rRNA m(4)C1402 methyltransferase, SAM-dependent	WP_000970479.1	Not Essential
81	b0083	chromosome	Protein_Coding	protein_coding	12	0	0	Underrepresented	ftsL	membrane bound cell division leucine zipper septum protein	WP_000625658.1	Essential
82	b0084	chromosome	Protein_Coding	protein_coding	88	0	0	Underrepresented	ftsI	transpeptidase involved in septal peptidoglycan synthesis; penicillin-binding protein 3	WP_000642196.1	Essential
83	b0085	chromosome	Protein_Coding	protein_coding	49	0	0	Underrepresented	murE	UDP-N-acetylmuramoyl-L-alanyl-D-glutamate:meso-diaminopimelate ligase	WP_000775093.1	Essential
84	b0086	chromosome	Protein_Coding	protein_coding	55	1.8	3	Underrepresented	murF	UDP-N-acetylmuramoyl-tripeptide:D-alanyl-D-alanine ligase	WP_000626685.1	Essential
85	b0087	chromosome	Protein_Coding	protein_coding	50	0	0	Underrepresented	mraY	phospho-N-acetylmuramoyl-pentapeptide transferase	WP_000964131.1	Essential
86	b0088	chromosome	Protein_Coding	protein_coding	49	0	0	Underrepresented	murD	UDP-N-acetylmuramoyl-L-alanine:D-glutamate ligase	WP_000796481.1	Essential
87	b0089	chromosome	Protein_Coding	protein_coding	58	1.7	11	Underrepresented	ftsW	putative lipid II flippase; integral membrane protein; FtsZ ring stabilizer	WP_001295532.1	Essential
88	b0090	chromosome	Protein_Coding	protein_coding	41	0	0	Underrepresented	murG	N-acetylglucosaminyl transferase	WP_000016560.1	Essential
89	b0091	chromosome	Protein_Coding	protein_coding	49	0	0	Underrepresented	murC	UDP-N-acetylmuramate:L-alanine ligase	WP_001096049.1	Essential
90	b0092	chromosome	Protein_Coding	protein_coding	44	45.5	26.55	Neutral	ddlB	D-alanine:D-alanine ligase	WP_000130056.1	Not Essential
91	b0093	chromosome	Protein_Coding	protein_coding	28	7.1	3	Underrepresented	ftsQ	divisome assembly protein, membrane anchored protein involved in growth of wall at septum	WP_000075748.1	Essential
92	b0094	chromosome	Protein_Coding	protein_coding	54	0	0	Underrepresented	ftsA	ATP-binding cell division FtsK recruitment protein	WP_000588474.1	Essential
93	b0095	chromosome	Protein_Coding	protein_coding	41	2.4	26	Underrepresented	ftsZ	GTP-binding tubulin-like cell division protein	WP_000462776.1	Essential
94	b0096	chromosome	Protein_Coding	protein_coding	38	2.6	70	Underrepresented	lpxC	UDP-3-O-acyl N-acetylglucosamine deacetylase	WP_000595482.1	Essential
95	b0097	chromosome	Protein_Coding	protein_coding	17	17.6	3.33333	Underrepresented	secM	regulator of secA translation	WP_000014321.1	Essential
96	b0098	chromosome	Protein_Coding	protein_coding	103	3.9	35.5	Underrepresented	secA	preprotein translocase subunit, ATPase	WP_000905789.1	Essential
97	b0099	chromosome	Protein_Coding	protein_coding	17	47.1	46	Neutral	mutT	dGTP-preferring nucleoside triphosphate pyrophosphohydrolase	WP_000736007.1	Not Essential
98	b0101	chromosome	Protein_Coding	protein_coding	2	50	21	Neutral	yacG	DNA gyrase inhibitor	WP_000005042.1	Not Essential
99	b0102	chromosome	Protein_Coding	protein_coding	27	70.4	39.8421	Neutral	zapD	FtsZ stabilizer	WP_001194734.1	Not Essential
100	b0103	chromosome	Protein_Coding	protein_coding	25	12	85.6667	Underrepresented	coaE	dephospho-CoA kinase	WP_001269520.1	Essential
101	b0104	chromosome	Protein_Coding	protein_coding	38	52.6	32.25	Neutral	guaC	GMP reductase	WP_001217338.1	Not Essential
102	b0106	chromosome	Protein_Coding	protein_coding	53	60.4	39.25	Neutral	hofC	assembly protein in type IV pilin biogenesis, transmembrane protein	WP_000157266.1	Not Essential
103	b0107	chromosome	Protein_Coding	protein_coding	63	74.6	36.8298	Neutral	hofB	T2SE secretion family protein; P-loop ATPase superfamily protein	WP_001025145.1	Not Essential
104	b0108	chromosome	Protein_Coding	protein_coding	19	73.7	54.0714	Neutral	ppdD	putative prepilin peptidase-dependent pilin	WP_000360904.1	Not Essential
105	b0109	chromosome	Protein_Coding	protein_coding	31	74.2	28.4783	Neutral	nadC	quinolinate phosphoribosyltransferase	WP_001135174.1	Not Essential
106	b0110	chromosome	Protein_Coding	protein_coding	20	70	41.0714	Neutral	ampD	1,6-anhydro-N-acetylmuramyl-L-alanine amidase, Zn-dependent; murein amidase	WP_000923721.1	Not Essential
107	b0111	chromosome	Protein_Coding	protein_coding	36	75	64.1481	Neutral	ampE	ampicillin resistance inner membrane protein; putative signaling protein in beta-lactamase regulation	WP_000172005.1	Not Essential
108	b0112	chromosome	Protein_Coding	protein_coding	79	68.4	34.6481	Neutral	aroP	aromatic amino acid transporter	WP_000969915.1	Not Essential
109	b0113	chromosome	Protein_Coding	protein_coding	20	70	30.5	Neutral	pdhR	pyruvate dehydrogenase complex repressor; autorepressor	WP_000331776.1	Not Essential
110	b0114	chromosome	Protein_Coding	protein_coding	110	0.9	8	Underrepresented	aceE	pyruvate dehydrogenase, decarboxylase component E1, thiamine triphosphate-binding	WP_000003820.1	Not Essential
111	b0115	chromosome	Protein_Coding	protein_coding	49	2	24	Underrepresented	aceF	pyruvate dehydrogenase, dihydrolipoyltransacetylase component E2	WP_000963518.1	Not Essential
112	b0116	chromosome	Protein_Coding	protein_coding	49	2	7	Underrepresented	lpd	dihydrolipoyl dehydrogenase; E3 component of pyruvate and 2-oxoglutarate dehydrogenases complexes; glycine cleavage system L protein; dihydrolipoamide dehydrogenase	WP_000102485.1	Not Essential
113	b0117	chromosome	Protein_Coding	protein_coding	71	76.1	51.4815	Neutral	yacH	DUF3300 family protein	WP_000784470.1	Not Essential
114	b0118	chromosome	Protein_Coding	protein_coding	82	6.1	2.6	Underrepresented	acnB	aconitate hydratase 2; aconitase B; 2-methyl-cis-aconitate hydratase	WP_001307570.1	Not Essential
115	b0119	chromosome	Protein_Coding	protein_coding	13	46.2	113.667	Neutral	yacL	UPF0231 family protein	WP_000384306.1	Not Essential
116	b0120	chromosome	Protein_Coding	protein_coding	51	64.7	25.8788	Neutral	speD	S-adenosylmethionine decarboxylase	WP_000734287.1	Not Essential
117	b0121	chromosome	Protein_Coding	protein_coding	41	53.7	35.0455	Regional	speE	spermidine synthase (putrescine aminopropyltransferase)	WP_000818411.1	Not Essential
118	b0122	chromosome	Protein_Coding	protein_coding	14	57.1	15.75	Neutral	yacC	PulS_OutS family protein	WP_001295568.1	Not Essential
119	b0123	chromosome	Protein_Coding	protein_coding	61	65.6	45	Neutral	cueO	multicopper oxidase (laccase)	WP_001189647.1	Not Essential
120	b0124	chromosome	Protein_Coding	protein_coding	88	72.7	45.7812	Neutral	gcd	glucose dehydrogenase	WP_001306211.1	Not Essential
121	b0125	chromosome	Protein_Coding	protein_coding	28	35.7	17.1	Regional	hpt	hypoxanthine phosphoribosyltransferase	WP_000683335.1	Not Essential
122	b0126	chromosome	Protein_Coding	protein_coding	26	3.8	26	Underrepresented	can	carbonic anhydrase	WP_000651599.1	Essential
123	b0127	chromosome	Protein_Coding	protein_coding	45	57.8	32.9615	Neutral	yadG	putative ABC transporter ATPase	WP_000150637.1	Not Essential
124	b0128	chromosome	Protein_Coding	protein_coding	34	76.5	34.1923	Neutral	yadH	putative ABC transporter permease	WP_000972203.1	Not Essential
125	b0129	chromosome	Protein_Coding	protein_coding	21	76.2	40	Neutral	yadI	putative PTS Enzyme IIA	WP_000901987.1	Not Essential
126	b0130	chromosome	Protein_Coding	protein_coding	65	60	21.3333	Neutral	yadE	putative polysaccharide deacetylase lipoprotein	WP_000277917.1	Not Essential
127	b0131	chromosome	Protein_Coding	protein_coding	12	58.3	43.4286	Neutral	panD	aspartate 1-decarboxylase	WP_000621515.1	Not Essential
128	b0132	chromosome	Protein_Coding	protein_coding	43	74.4	30.375	Neutral	yadD	transposase_31 family protein	WP_000339954.1	Not Essential
129	b0133	chromosome	Protein_Coding	protein_coding	31	48.4	38.0667	Neutral	panC	pantothenate synthetase	WP_000905383.1	Not Essential
130	b0134	chromosome	Protein_Coding	protein_coding	35	68.6	27.4167	Neutral	panB	3-methyl-2-oxobutanoate hydroxymethyltransferase	WP_000805497.1	Not Essential
131	b0135	chromosome	Protein_Coding	protein_coding	105	39	14	Regional	yadC	putative fimbrial-like adhesin protein	WP_000848455.1	Not Essential
132	b0136	chromosome	Protein_Coding	protein_coding	42	33.3	8.21429	Regional	yadK	putative fimbrial-like adhesin protein	WP_000553749.1	Not Essential
133	b0137	chromosome	Protein_Coding	protein_coding	41	56.1	21.8696	Neutral	yadL	putative fimbrial-like adhesin protein	WP_001310526.1	Not Essential
134	b0138	chromosome	Protein_Coding	protein_coding	41	36.6	18.2667	Neutral	yadM	putative fimbrial-like adhesin protein	WP_000598300.1	Not Essential
135	b0139	chromosome	Protein_Coding	protein_coding	180	54.4	23.9898	Neutral	htrE	putative outer membrane usher protein	WP_000151605.1	Not Essential
136	b0140	chromosome	Protein_Coding	protein_coding	48	50	13.9167	Regional	yadV	putative periplasmic pilin chaperone	WP_000465928.1	Not Essential
137	b0141	chromosome	Protein_Coding	protein_coding	37	54.1	16.15	Neutral	yadN	putative fimbrial-like adhesin protein	WP_000038438.1	Not Essential
138	b0142	chromosome	Protein_Coding	protein_coding	21	9.5	15	Underrepresented	folK	2-amino-4-hydroxy-6-hydroxymethyldihyropteridine pyrophosphokinase	WP_000215139.1	Essential
139	b0143	chromosome	Protein_Coding	protein_coding	57	36.8	18.0952	Neutral	pcnB	poly(A) polymerase	WP_010723084.1	Not Essential
140	b0144	chromosome	Protein_Coding	protein_coding	34	64.7	32.3182	Neutral	gluQ	glutamyl-Q tRNA(Asp) synthetase	WP_000937424.1	Not Essential
141	b0145	chromosome	Protein_Coding	protein_coding	15	6.7	7	Underrepresented	dksA	transcriptional regulator of rRNA transcription; DnaK suppressor protein	WP_001155227.1	Not Essential
142	b0146	chromosome	Protein_Coding	protein_coding	36	61.1	25.6818	Neutral	sfsA	sugar fermentation stimulation protein A	WP_000396036.1	Not Essential
143	b0147	chromosome	Protein_Coding	protein_coding	19	57.9	50.1818	Neutral	ligT	2'-5' RNA ligase	WP_001294700.1	Not Essential
144	b0148	chromosome	Protein_Coding	protein_coding	85	62.4	50.3396	Neutral	hrpB	putative ATP-dependent helicase	WP_001350480.1	Not Essential
145	b0149	chromosome	Protein_Coding	protein_coding	88	35.2	25.3871	Regional	mrcB	fused glycosyl transferase and transpeptidase	WP_000918162.1	Not Essential
146	b0150	chromosome	Protein_Coding	protein_coding	118	74.6	53.8409	Neutral	fhuA	ferrichrome outer membrane transporter	WP_000124438.1	Not Essential
147	b0151	chromosome	Protein_Coding	protein_coding	22	59.1	34.8462	Neutral	fhuC	iron(3+)-hydroxamate import ABC transporter ATPase	WP_001158931.1	Not Essential
148	b0152	chromosome	Protein_Coding	protein_coding	35	71.4	27.76	Neutral	fhuD	iron(3+)-hydroxamate import ABC transporter periplasmic binding protein	WP_001310529.1	Not Essential
149	b0153	chromosome	Protein_Coding	protein_coding	53	49.1	42.2692	Neutral	fhuB	iron(3+)-hydroxamate import ABC transporter permease	WP_000044072.1	Not Essential
150	b0154	chromosome	Protein_Coding	protein_coding	49	0	0	Underrepresented	hemL	glutamate-1-semialdehyde aminotransferase (aminomutase)	WP_000045315.1	Essential
151	b0155	chromosome	Protein_Coding	protein_coding	67	62.7	30.4524	Neutral	clcA	H(+)/Cl(-) exchange transporter	WP_000845394.1	Not Essential
152	b0156	chromosome	Protein_Coding	protein_coding	15	13.3	4.5	Underrepresented	erpA	iron-sulfur cluster insertion protein	WP_001295564.1	Essential
153	b0157	chromosome	Protein_Coding	protein_coding	31	58.1	28.2222	Neutral	yadS	UPF0126 family inner membrane protein	WP_000964221.1	Not Essential
154	b0158	chromosome	Protein_Coding	protein_coding	24	50	58.25	Neutral	btuF	vitamin B12 ABC transporter periplasmic binding protein	WP_001129927.1	Not Essential
155	b0159	chromosome	Protein_Coding	protein_coding	23	4.3	38	Underrepresented	mtn	5'-methylthioadenosine/S-adenosylhomocysteine nucleosidase	WP_000689844.1	Not Essential
156	b0160	chromosome	Protein_Coding	protein_coding	84	53.6	19.8222	Neutral	dgt	deoxyguanosine triphosphate triphosphohydrolase	WP_000057073.1	Not Essential
157	b0161	chromosome	Protein_Coding	protein_coding	49	51	22.68	Neutral	degP	serine endoprotease (protease Do), membrane-associated	WP_000753946.1	Not Essential
158	b0162	chromosome	Protein_Coding	protein_coding	50	72	59.6111	Neutral	cdaR	carbohydrate diacid regulon transcriptional regulator; autoregulator	WP_000929443.1	Not Essential
159	b0163	chromosome	Protein_Coding	protein_coding	24	66.7	28.0625	Neutral	yaeH	UPF0325 family protein	WP_000272188.1	Not Essential
160	b0164	chromosome	Protein_Coding	protein_coding	34	76.5	35.1538	Neutral	yaeI	phosphodiesterase with model substrate bis-pNPP	WP_000625631.1	Not Essential
161	b0166	chromosome	Protein_Coding	protein_coding	32	3.1	6	Underrepresented	dapD	2,3,4,5-tetrahydropyridine-2-carboxylate N-succinyltransferase	WP_001186650.1	Essential
162	b0167	chromosome	Protein_Coding	protein_coding	98	8.2	20.125	Underrepresented	glnD	uridylyltransferase	WP_001094586.1	Not Essential
163	b0168	chromosome	Protein_Coding	protein_coding	36	2.8	37	Underrepresented	map	methionine aminopeptidase	WP_001018194.1	Essential
164	b4414	chromosome	RNA	ncRNA	9	0	0	Underrepresented	tff	novel sRNA, function unknown	---	Not Essential
165	b0169	chromosome	Protein_Coding	protein_coding	22	0	0	Underrepresented	rpsB	30S ribosomal subunit protein S2	WP_000246882.1	Essential
166	b0170	chromosome	Protein_Coding	protein_coding	24	0	0	Underrepresented	tsf	translation elongation factor EF-Ts	WP_000818114.1	Essential
167	b0171	chromosome	Protein_Coding	protein_coding	28	3.6	2	Underrepresented	pyrH	uridylate kinase	WP_000224573.1	Essential
168	b0172	chromosome	Protein_Coding	protein_coding	17	0	0	Underrepresented	frr	ribosome recycling factor	WP_000622418.1	Essential
169	b0173	chromosome	Protein_Coding	protein_coding	42	0	0	Underrepresented	dxr	1-deoxy-D-xylulose 5-phosphate reductoisomerase	WP_000811923.1	Essential
170	b0174	chromosome	Protein_Coding	protein_coding	39	0	0	Underrepresented	ispU	undecaprenyl pyrophosphate synthase	WP_000979579.1	Essential
171	b0175	chromosome	Protein_Coding	protein_coding	48	0	0	Underrepresented	cdsA	CDP-diglyceride synthase	WP_000922446.1	Essential
172	b0176	chromosome	Protein_Coding	protein_coding	59	0	0	Underrepresented	rseP	inner membrane zinc RIP metalloprotease; RpoE activator, by degrading RseA; cleaved signal peptide endoprotease	WP_001295561.1	Essential
173	b0177	chromosome	Protein_Coding	protein_coding	135	0	0	Underrepresented	bamA	BamABCDE complex OM biogenesis outer membrane pore-forming assembly factor	WP_001240896.1	Essential
174	b0178	chromosome	Protein_Coding	protein_coding	16	25	38	Underrepresented	skp	periplasmic chaperone	WP_000758956.1	Not Essential
175	b0179	chromosome	Protein_Coding	protein_coding	41	2.4	2	Underrepresented	lpxD	UDP-3-O-(3-hydroxymyristoyl)-glucosamine N-acyltransferase	WP_001139279.1	Essential
176	b0180	chromosome	Protein_Coding	protein_coding	16	0	0	Underrepresented	fabZ	(3R)-hydroxymyristol acyl carrier protein dehydratase	WP_000210739.1	Essential
177	b0181	chromosome	Protein_Coding	protein_coding	30	0	0	Underrepresented	lpxA	UDP-N-acetylglucosamine acetyltransferase	WP_000565966.1	Essential
178	b0182	chromosome	Protein_Coding	protein_coding	34	0	0	Underrepresented	lpxB	tetraacyldisaccharide-1-P synthase	WP_000139654.1	Essential
179	b0183	chromosome	Protein_Coding	protein_coding	13	46.2	33.3333	Regional	rnhB	ribonuclease HII, degrades RNA of DNA-RNA hybrids	WP_000569430.1	Not Essential
180	b0184	chromosome	Protein_Coding	protein_coding	136	0	0	Underrepresented	dnaE	DNA polymerase III alpha subunit	WP_001294757.1	Essential
181	b0185	chromosome	Protein_Coding	protein_coding	36	8.3	84	Underrepresented	accA	acetyl-CoA carboxylase, carboxytransferase, alpha subunit	WP_000055741.1	Essential
182	b0186	chromosome	Protein_Coding	protein_coding	99	75.8	44.0667	Neutral	ldcC	lysine decarboxylase 2, constitutive	WP_001020973.1	Not Essential
183	b0187	chromosome	Protein_Coding	protein_coding	15	73.3	17.9091	Neutral	yaeR	putative lyase	WP_000901099.1	Not Essential
184	b0188	chromosome	Protein_Coding	protein_coding	36	5.6	22.5	Underrepresented	tilS	tRNA(Ile)-lysidine synthetase	WP_000176549.1	Essential
185	b0189	chromosome	Protein_Coding	protein_coding	12	66.7	39.5	Neutral	rof	modulator of Rho-dependent transcription termination	WP_001299435.1	Not Essential
186	b4406	chromosome	Protein_Coding	protein_coding	9	88.9	50.375	Neutral	yaeP	UPF0253 family protein	WP_000417058.1	Not Essential
187	b0190	chromosome	Protein_Coding	protein_coding	20	70	47.7857	Neutral	yaeQ	PDDEXK superfamily protein	WP_001185290.1	Not Essential
188	b0191	chromosome	Protein_Coding	protein_coding	12	83.3	16.9	Neutral	arfB	alternative stalled-ribosome rescue factor B; peptidyl-tRNA hydrolase, ribosome-attached	WP_000635537.1	Not Essential
189	b0192	chromosome	Protein_Coding	protein_coding	35	71.4	36.08	Neutral	nlpE	lipoprotein involved with copper homeostasis and adhesion	WP_000239163.1	Not Essential
190	b0193	chromosome	Protein_Coding	protein_coding	34	64.7	51.9091	Neutral	yaeF	putative lipoprotein	WP_001336393.1	Not Essential
191	b0194	chromosome	Protein_Coding	protein_coding	64	0	0	Underrepresented	proS	prolyl-tRNA synthetase	WP_001260717.1	Essential
192	b0195	chromosome	Protein_Coding	protein_coding	28	50	17.4286	Neutral	tsaA	tRNA-Thr(GGU) m(6)t(6)A37 methyltransferase, SAM-dependent	WP_000094011.1	Not Essential
193	b0196	chromosome	Protein_Coding	protein_coding	21	85.7	32.7222	Neutral	rcsF	putative outer membrane protein	WP_001202329.1	Not Essential
194	b0197	chromosome	Protein_Coding	protein_coding	27	66.7	22.8889	Neutral	metQ	DL-methionine transporter subunit	WP_000874226.1	Not Essential
195	b0198	chromosome	Protein_Coding	protein_coding	33	69.7	46.5217	Neutral	metI	DL-methionine transporter subunit	WP_001294600.1	Not Essential
196	b0199	chromosome	Protein_Coding	protein_coding	34	70.6	41.7917	Neutral	metN	DL-methionine transporter subunit	WP_000594006.1	Not Essential
197	b0200	chromosome	Protein_Coding	protein_coding	29	0	0	Underrepresented	gmhB	D,D-heptose 1,7-bisphosphate phosphatase	WP_001140187.1	Not Essential
198	b0201	chromosome	RNA	rRNA	68	82.4	13.1786	Neutral	rrsH	16S ribosomal RNA of rrnH operon	---	Not Essential
199	b0202	chromosome	RNA	tRNA	4	25	30	Neutral	ileV	tRNA-Ile	---	Not Essential
200	b0203	chromosome	RNA	tRNA	3	100	15	Neutral	alaV	tRNA-Ala	---	Not Essential
201	b0204	chromosome	RNA	rRNA	148	79.1	13.8291	Neutral	rrlH	23S ribosomal RNA of rrnH operon	---	Not Essential
202	b0205	chromosome	RNA	rRNA	4	50	11	Neutral	rrfH	5S ribosomal RNA of rrnH operon	---	Not Essential
203	b0206	chromosome	RNA	tRNA	3	33.3	7	Neutral	aspU	tRNA-Asp	---	Not Essential
204	b0207	chromosome	Protein_Coding	protein_coding	43	53.5	21.913	Neutral	dkgB	2,5-diketo-D-gluconate reductase B	WP_000997010.1	Not Essential
205	b0208	chromosome	Protein_Coding	protein_coding	47	63.8	20.1667	Neutral	yafC	LysR family putative transcriptional regulator	WP_000648572.1	Not Essential
206	b0209	chromosome	Protein_Coding	protein_coding	43	90.7	35.1538	Neutral	yafD	endo/exonuclease/phosphatase family protein	WP_001230983.1	Not Essential
207	b0210	chromosome	Protein_Coding	protein_coding	35	74.3	44.4231	Neutral	yafE	putative S-adenosyl-L-methionine-dependent methyltransferase	WP_000016007.1	Not Essential
208	b0211	chromosome	Protein_Coding	protein_coding	54	72.2	64.6154	Neutral	mltD	putative membrane-bound lytic murein transglycosylase D	WP_000644685.1	Not Essential
209	b0212	chromosome	Protein_Coding	protein_coding	51	45.1	26.2174	Regional	gloB	hydroxyacylglutathione hydrolase	WP_001052715.1	Not Essential
210	b0213	chromosome	Protein_Coding	protein_coding	28	57.1	28.875	Neutral	yafS	putative S-adenosyl-L-methionine-dependent methyltransferase	WP_001326702.1	Not Essential
211	b0214	chromosome	Protein_Coding	protein_coding	20	10	34.5	Underrepresented	rnhA	ribonuclease HI, degrades RNA of DNA-RNA hybrids	WP_000917883.1	Not Essential
212	b0215	chromosome	Protein_Coding	protein_coding	33	3	47	Underrepresented	dnaQ	DNA polymerase III epsilon subunit	WP_001340895.1	Not Essential
213	b0216	chromosome	RNA	tRNA	3	33.3	15	Underrepresented	aspV	tRNA-Asp	---	Not Essential
214	b0217	chromosome	Protein_Coding	protein_coding	45	28.9	8.69231	Regional	yafT	lipoprotein	WP_001086141.1	Not Essential
215	b4586	chromosome	Protein_Coding	protein_coding	52	3.8	1	Underrepresented	ykfM	lethality reduction protein, putative inner membrane protein	WP_001236645.1	Not Essential
216	b0218	chromosome	Pseudogene	pseudogene	23	43.5	16.9	Regional	yafU	---	---	Not Essential
217	b4503	chromosome	Pseudogene	pseudogene	15	80	13.5833	Neutral	yafF	---	---	Not Essential
218	b0219	chromosome	Protein_Coding	protein_coding	29	79.3	28.6087	Neutral	yafV	putative NAD(P)-binding C-N hydrolase family amidase	WP_001118036.1	Not Essential
219	b0220	chromosome	Protein_Coding	protein_coding	20	85	54.0588	Neutral	ivy	inhibitor of c-type lysozyme, periplasmic	WP_000532698.1	Not Essential
220	b0221	chromosome	Protein_Coding	protein_coding	85	51.8	20.5	Neutral	fadE	acyl coenzyme A dehydrogenase	WP_000973083.1	Not Essential
221	b0222	chromosome	Protein_Coding	protein_coding	28	7.1	24	Underrepresented	gmhA	D-sedoheptulose 7-phosphate isomerase	WP_000284050.1	Not Essential
222	b0223	chromosome	Protein_Coding	protein_coding	37	70.3	39.7692	Neutral	yafJ	type 2 glutamine amidotransferase family protein	WP_000333380.1	Not Essential
223	b0224	chromosome	Protein_Coding	protein_coding	42	71.4	31.4667	Neutral	yafK	L,D-transpeptidase-related protein	WP_001225679.1	Not Essential
224	b0225	chromosome	Protein_Coding	protein_coding	22	31.8	11.1429	Neutral	yafQ	mRNA interferase toxin of toxin-antitoxin pair YafQ/DinJ	WP_000615983.1	Not Essential
225	b0226	chromosome	Protein_Coding	protein_coding	11	36.4	20.5	Regional	dinJ	antitoxin of YafQ-DinJ toxin-antitoxin system	WP_000729703.1	Not Essential
226	b0227	chromosome	Protein_Coding	protein_coding	32	68.8	46.2727	Neutral	yafL	putative lipoprotein and C40 family peptidase	WP_000056849.1	Not Essential
227	b0228	chromosome	Protein_Coding	protein_coding	30	60	38	Neutral	rayT	RAYT REP element-mobilizing transposase; TnpA(REP)	WP_000006255.1	Not Essential
228	b0229	chromosome	Pseudogene	pseudogene	57	63.2	40.75	Neutral	lfhA	---	---	Not Essential
229	b0230	chromosome	Pseudogene	pseudogene	30	73.3	26.9091	Neutral	lafU	---	---	Not Essential
230	b0231	chromosome	Protein_Coding	protein_coding	35	48.6	29.6471	Neutral	dinB	DNA polymerase IV	WP_001226164.1	Not Essential
231	b0232	chromosome	Protein_Coding	protein_coding	19	5.3	2	Underrepresented	yafN	antitoxin of the YafO-YafN toxin-antitoxin system	WP_000554758.1	Not Essential
232	b0233	chromosome	Protein_Coding	protein_coding	19	68.4	23.7692	Neutral	yafO	mRNA interferase toxin of the YafO-YafN toxin-antitoxin system	WP_001263489.1	Not Essential
233	b0234	chromosome	Protein_Coding	protein_coding	29	37.9	6.54545	Regional	yafP	GNAT family putative N-acetyltransferase	WP_001059892.1	Not Essential
234	b0235	chromosome	Pseudogene	pseudogene	12	66.7	15.25	Neutral	ykfJ	---	---	Not Essential
235	b0236	chromosome	Pseudogene	pseudogene	17	47.1	50.125	Neutral	prfH	---	---	Not Essential
236	b0237	chromosome	Protein_Coding	protein_coding	58	43.1	17.92	Neutral	pepD	aminoacyl-histidine dipeptidase (peptidase D)	WP_001292994.1	Not Essential
237	b0238	chromosome	Protein_Coding	protein_coding	21	42.9	11.5556	Neutral	gpt	xanthine phosphoribosyltransferase; xanthine-guanine phosphoribosyltransferase	WP_001291990.1	Not Essential
238	b0239	chromosome	Protein_Coding	protein_coding	49	59.2	39.0345	Neutral	frsA	fermentation-respiration switch protein; PTS Enzyme IIA(Glc)-binding protein; pNP-butyrate esterase activity	WP_000189532.1	Not Essential
239	b0240	chromosome	Pseudogene	pseudogene	49	69.4	21.5882	Neutral	crl	---	---	Not Essential
240	b0241	chromosome	Protein_Coding	protein_coding	65	33.8	19.5	Regional	phoE	outer membrane phosphoporin protein E	WP_000749863.1	Not Essential
241	b0242	chromosome	Protein_Coding	protein_coding	38	60.5	45.7391	Neutral	proB	gamma-glutamate kinase	WP_001285288.1	Not Essential
242	b0243	chromosome	Protein_Coding	protein_coding	46	63	45.2414	Neutral	proA	gamma-glutamylphosphate reductase	WP_000893278.1	Not Essential
243	b0244	chromosome	RNA	tRNA	7	57.1	43.25	Neutral	thrW	tRNA-Thr	---	Not Essential
244	b4626	chromosome	Pseudogene	pseudogene	5	100	21.8	Neutral	ykfN	---	---	Not Essential
245	b0245	chromosome	Protein_Coding	protein_coding	16	68.8	16.9091	Neutral	ykfI	CP4-6 prophage; toxin of the YkfI-YafW toxin-antitoxin system	WP_000854672.1	Not Essential
246	b0246	chromosome	Protein_Coding	protein_coding	12	66.7	132.5	Neutral	yafW	CP4-6 prophage; antitoxin of the YkfI-YafW toxin-antitoxin system	WP_000070395.1	Not Essential
247	b4504	chromosome	Protein_Coding	protein_coding	13	76.9	65.7	Neutral	ykfH	uncharacterized protein	WP_000691994.1	Not Essential
248	b0247	chromosome	Protein_Coding	protein_coding	12	58.3	28.2857	Neutral	ykfG	CP4-6 prophage; RadC-like JAB domain protein	WP_000811693.1	Not Essential
249	b0248	chromosome	Protein_Coding	protein_coding	21	81	64.7059	Neutral	yafX	CP4-6 prophage; uncharacterized protein	WP_000211838.1	Not Essential
250	b0249	chromosome	Protein_Coding	protein_coding	8	75	78.1667	Neutral	ykfF	CP4-6 prophage; uncharacterized protein	WP_000194654.1	Not Essential
251	b0250	chromosome	Protein_Coding	protein_coding	21	81	66.0588	Neutral	ykfB	CP4-6 prophage; uncharacterized protein	WP_001547765.1	Not Essential
252	b0251	chromosome	Protein_Coding	protein_coding	21	71.4	52.2	Neutral	yafY	lipoprotein, inner membrane; degP regulator; CP4-6 prophage	WP_000824223.1	Not Essential
253	b4627	chromosome	Pseudogene	pseudogene	4	75	36.6667	Neutral	ykfL	---	---	Not Essential
254	b4628	chromosome	Pseudogene	pseudogene	5	60	111	Neutral	ykfK	---	---	Not Essential
255	b0252	chromosome	Protein_Coding	protein_coding	28	75	77.4762	Neutral	yafZ	CP4-6 prophage; conserved protein	WP_000197389.1	Not Essential
256	b0253	chromosome	Protein_Coding	protein_coding	35	80	38.8214	Neutral	ykfA	CP4-6 prophage; putative GTP-binding protein	WP_001065553.1	Not Essential
257	b0254	chromosome	Protein_Coding	protein_coding	41	78	29.1875	Neutral	perR	CP4-6 prophage; putative DNA-binding transcriptional regulator	WP_000770246.1	Not Essential
258	b4587	chromosome	Pseudogene	pseudogene	76	81.6	39.7903	Neutral	insN	---	---	Not Essential
259	b0256	chromosome	Protein_Coding	protein_coding	61	86.9	27.6792	Neutral	insI1	IS30 transposase	WP_001254938.1	Not Essential
260	b4587	chromosome	Pseudogene	pseudogene	76	81.6	39.7903	Neutral	insN	---	---	Not Essential
261	b4690	chromosome	RNA	ncRNA	2	100	63	Neutral	eyeA	novel sRNA, function unknown, CP4-6 propahge	---	Not Essential
262	b0258	chromosome	Pseudogene	pseudogene	37	75.7	40.8214	Neutral	ykfC	---	---	Not Essential
263	b0259	chromosome	Protein_Coding	protein_coding	20	95	24.1053	Neutral	insH1	IS5 transposase and trans-activator	WP_010723085.1	Not Essential
264	b0260	chromosome	Protein_Coding	protein_coding	58	62.1	41.0278	Neutral	mmuP	CP4-6 prophage; putative S-methylmethionine transporter	WP_001393629.1	Not Essential
265	b0261	chromosome	Protein_Coding	protein_coding	32	59.4	50.6842	Neutral	mmuM	CP4-6 prophage; S-methylmethionine:homocysteine methyltransferase	WP_000081352.1	Not Essential
266	b0262	chromosome	Protein_Coding	protein_coding	36	75	60	Neutral	afuC	CP4-6 prophage; putative ferric transporter subunit	WP_000192349.1	Not Essential
267	b0263	chromosome	Pseudogene	pseudogene	14	78.6	53.9091	Neutral	afuB	---	---	Not Essential
268	b0264	chromosome	Protein_Coding	protein_coding	18	83.3	27.1333	Neutral	insB1	IS1 transposase B	WP_001119292.1	Not Essential
269	b0265	chromosome	Protein_Coding	protein_coding	11	72.7	21.125	Neutral	insA	IS1 repressor TnpA	WP_000179210.1	Not Essential
270	b4708	chromosome	Pseudogene	pseudogene	8	87.5	32.4286	Neutral	insI1	---	---	Not Essential
271	b4505	chromosome	Pseudogene	pseudogene	13	61.5	21.625	Neutral	insX	---	---	Not Essential
272	b0266	chromosome	Pseudogene	pseudogene	14	71.4	133.8	Neutral	yagB	---	---	Not Essential
273	b0267	chromosome	Protein_Coding	protein_coding	28	64.3	65.8889	Neutral	yagA	CP4-6 prophage; putative DNA-binding transcriptional regulator	WP_010723086.1	Not Essential
274	b0268	chromosome	Protein_Coding	protein_coding	19	42.1	33.875	Neutral	yagE	2-keto-3-deoxy gluconate (KDG) aldolase; CP4-6 prophage	WP_001136613.1	Not Essential
275	b0269	chromosome	Protein_Coding	protein_coding	31	54.8	44	Neutral	yagF	CP4-6 prophage; dehydratase family protein	WP_000151261.1	Not Essential
276	b0270	chromosome	Protein_Coding	protein_coding	32	78.1	57.24	Neutral	yagG	CP4-6 prophage; putative sugar transporter	WP_000192863.1	Not Essential
277	b0271	chromosome	Protein_Coding	protein_coding	46	71.7	75.9394	Neutral	yagH	CP4-6 prophage; putative xylosidase/arabinosidase	WP_000406871.1	Not Essential
278	b0272	chromosome	Protein_Coding	protein_coding	20	75	40	Neutral	yagI	CP4-6 prophage; putative DNA-binding transcriptional regulator	WP_001121657.1	Not Essential
279	b0273	chromosome	Protein_Coding	protein_coding	27	59.3	51.375	Regional	argF	ornithine carbamoyltransferase 2, chain F; CP4-6 prophage	WP_001281825.1	Not Essential
280	b4688	chromosome	Pseudogene	pseudogene	12	75	33	Neutral	ykgS	---	---	Not Essential
281	b0274	chromosome	Protein_Coding	protein_coding	21	85.7	25.4444	Neutral	insB1	IS1 transposase B	WP_001119292.1	Not Essential
282	b0275	chromosome	Protein_Coding	protein_coding	8	87.5	21.2857	Neutral	insA	IS1 repressor TnpA	WP_000179210.1	Not Essential
283	b0276	chromosome	Pseudogene	pseudogene	34	82.4	40.7857	Neutral	yagJ	---	---	Not Essential
284	b0277	chromosome	Protein_Coding	protein_coding	52	59.6	27.8065	Neutral	yagK	CP4-6 prophage; conserved protein	WP_000860996.1	Not Essential
285	b0278	chromosome	Protein_Coding	protein_coding	47	34	6.9375	Regional	yagL	CP4-6 prophage; DNA-binding protein	WP_001214248.1	Not Essential
286	b0279	chromosome	Protein_Coding	protein_coding	64	20.3	13.0769	Underrepresented	yagM	CP4-6 prophage; uncharacterized protein	WP_000072039.1	Not Essential
287	b0280	chromosome	Protein_Coding	protein_coding	26	80.8	28.0952	Neutral	yagN	CP4-6 prophage; uncharacterized protein	WP_000224818.1	Not Essential
288	b0281	chromosome	Protein_Coding	protein_coding	81	72.8	28.2881	Neutral	intF	CP4-6 prophage; putative phage integrase	WP_001407714.1	Not Essential
289	b4629	chromosome	RNA	tRNA_pseudogene	4	50	8	Neutral	ptwF	tRNA-OTHER	---	Not Essential
290	b4694	chromosome	Pseudogene	pseudogene	15	80	22.5833	Neutral	yagP	---	---	Not Essential
291	b4695	chromosome	Pseudogene	pseudogene	1	100	22	Neutral	ykgT	---	---	Not Essential
292	b0283	chromosome	Protein_Coding	protein_coding	22	59.1	15.3077	Neutral	paoD	moco insertion factor for PaoABC aldehyde oxidoreductase	WP_000121359.1	Not Essential
293	b0284	chromosome	Protein_Coding	protein_coding	71	54.9	30.5128	Neutral	paoC	PaoABC aldehyde oxidoreductase, Moco-containing subunit	WP_000667026.1	Not Essential
294	b0285	chromosome	Protein_Coding	protein_coding	38	57.9	53.4091	Neutral	paoB	PaoABC aldehyde oxidoreductase, FAD-containing subunit	WP_000643333.1	Not Essential
295	b0286	chromosome	Protein_Coding	protein_coding	23	60.9	67.7143	Neutral	paoA	PaoABC aldehyde oxidoreductase, 2Fe-2S subunit	WP_000070700.1	Not Essential
296	b0287	chromosome	Protein_Coding	protein_coding	30	70	23.2381	Neutral	yagU	DUF1440 family inner membrane acid resistance protein	WP_001019920.1	Not Essential
297	b0288	chromosome	Protein_Coding	protein_coding	14	64.3	16.7778	Neutral	ykgJ	UPF0153 cysteine cluster protein	WP_001303809.1	Not Essential
298	b0289	chromosome	Protein_Coding	protein_coding	36	75	59.3333	Neutral	ecpE	ECP production pilus chaperone	WP_001350485.1	Not Essential
299	b0290	chromosome	Protein_Coding	protein_coding	84	73.8	44.1935	Neutral	ecpD	polymerized tip adhesin of ECP fibers	WP_001310578.1	Not Essential
300	b0291	chromosome	Protein_Coding	protein_coding	106	70.8	31.76	Neutral	ecpC	ECP production outer membrane protein	WP_001131096.1	Not Essential
301	b0292	chromosome	Protein_Coding	protein_coding	28	60.7	39.2941	Neutral	ecpB	ECP production pilus chaperone	WP_000716398.1	Not Essential
302	b0293	chromosome	Protein_Coding	protein_coding	34	64.7	32.0455	Neutral	ecpA	ECP pilin	WP_000730972.1	Not Essential
303	b0294	chromosome	Protein_Coding	protein_coding	52	15.4	29.5	Underrepresented	ecpR	putative transcriptional regulator for the ecp operon	WP_000220247.1	Not Essential
304	b0295	chromosome	Protein_Coding	protein_coding	13	46.2	11.1667	Neutral	ykgL	uncharacterized protein	WP_001147279.1	Not Essential
305	b4506	chromosome	Protein_Coding	protein_coding	8	87.5	13.4286	Neutral	ykgO	RpmJ-like protein	WP_000866436.1	Not Essential
306	b0296	chromosome	Protein_Coding	protein_coding	13	92.3	36.4167	Neutral	ykgM	50S ribosomal protein L31 type B; alternative zinc-limitation L31 protein	WP_000803998.1	Not Essential
307	b4671	chromosome	Protein_Coding	protein_coding	11	9.1	11	Underrepresented	ykgR	uncharacterized protein	WP_000662258.1	Not Essential
308	b4630	chromosome	Pseudogene	pseudogene	5	40	4.5	Underrepresented	ykgP	---	---	Not Essential
309	b0297	chromosome	Pseudogene	pseudogene	53	37.7	21.5	Regional	eaeH	---	---	Not Essential
310	b0298	chromosome	Protein_Coding	protein_coding	10	90	23.2222	Neutral	insE1	IS3 transposase A	WP_000169527.1	Not Essential
311	b0299	chromosome	Protein_Coding	protein_coding	33	87.9	30.2069	Neutral	insF1	IS3 transposase B	WP_000878218.1	Not Essential
312	b0300	chromosome	Pseudogene	pseudogene	31	35.5	18.4545	Neutral	ykgA	---	---	Not Essential
313	b4631	chromosome	Pseudogene	pseudogene	7	42.9	10.3333	Neutral	ykgQ	---	---	Not Essential
314	b0301	chromosome	Protein_Coding	protein_coding	35	31.4	23.9091	Regional	rclC	reactive chlorine species (RCS) stress resistance inner membrane protein	WP_001299021.1	Not Essential
315	b0303	chromosome	Protein_Coding	protein_coding	21	4.8	10	Underrepresented	rclB	reactive chlorine species (RCS) stress resistance periplasmic protein	WP_000474084.1	Not Essential
316	b0304	chromosome	Protein_Coding	protein_coding	86	58.1	26.46	Neutral	rclA	reactive chlorine stress species (RCS) resistance protein; pyridine nucleotide-dependent disulfide oxidoreductase family	WP_001046307.1	Not Essential
317	b0305	chromosome	Protein_Coding	protein_coding	34	52.9	36.7222	Regional	rclR	reactive chlorine species (RCS)-specific activator of the rcl genes	WP_000339594.1	Not Essential
318	b0306	chromosome	Protein_Coding	protein_coding	30	70	31.6667	Neutral	ykgE	cysteine-rich LutA family protein; putative electron transport chain YkgEFG component	WP_001102108.1	Not Essential
319	b0307	chromosome	Protein_Coding	protein_coding	57	71.9	34.3659	Neutral	ykgF	ferridoxin-like LutB family protein; putative electron transport chain YkgEFG component	WP_000023927.1	Not Essential
320	b0308	chromosome	Protein_Coding	protein_coding	29	62.1	35.3889	Neutral	ykgG	LutC family protein; putative electron transport chain YkgEFG component	WP_000370307.1	Not Essential
321	b0310	chromosome	Protein_Coding	protein_coding	57	21.1	13.4167	Underrepresented	ykgH	putative inner membrane protein	WP_001209100.1	Not Essential
322	b0311	chromosome	Protein_Coding	protein_coding	54	66.7	39.1944	Neutral	betA	choline dehydrogenase, a flavoprotein	WP_001159094.1	Not Essential
323	b0312	chromosome	Protein_Coding	protein_coding	48	62.5	31.5667	Neutral	betB	betaine aldehyde dehydrogenase, NAD-dependent	WP_000089110.1	Not Essential
324	b0313	chromosome	Protein_Coding	protein_coding	16	75	43.9167	Neutral	betI	choline-inducible betIBA-betT divergent operon transcriptional repressor	WP_001335745.1	Not Essential
325	b0314	chromosome	Protein_Coding	protein_coding	87	57.5	33.86	Neutral	betT	choline transporter of high affinity	WP_000131044.1	Not Essential
326	b0315	chromosome	Protein_Coding	protein_coding	61	63.9	22.7949	Neutral	yahA	c-di-GMP-specific phosphodiesterase	WP_001301264.1	Not Essential
327	b0316	chromosome	Protein_Coding	protein_coding	55	54.5	28.1333	Neutral	yahB	putative DNA-bindng transcriptional regulator	WP_001084394.1	Not Essential
328	b0317	chromosome	Protein_Coding	protein_coding	25	48	22	Neutral	yahC	putative inner membrane protein	WP_001013892.1	Not Essential
329	b0318	chromosome	Protein_Coding	protein_coding	47	42.6	20.8	Regional	yahD	ankyrin repeat protein	WP_000023635.1	Not Essential
330	b0319	chromosome	Protein_Coding	protein_coding	52	36.5	27	Regional	yahE	DUF2877 family protein	WP_001310582.1	Not Essential
331	b0320	chromosome	Protein_Coding	protein_coding	32	62.5	32.25	Neutral	yahF	putative NAD(P)-binding succinyl-CoA synthase	WP_000111836.1	Not Essential
332	b0321	chromosome	Protein_Coding	protein_coding	44	63.6	37.6071	Neutral	yahG	DUF1116 family protein	WP_000083429.1	Not Essential
333	b0323	chromosome	Protein_Coding	protein_coding	31	58.1	35.3889	Neutral	yahI	carbamate kinase-like protein	WP_000661672.1	Not Essential
334	b0324	chromosome	Protein_Coding	protein_coding	38	63.2	26.5833	Neutral	yahJ	putative metallo-dependent hydrolase domain deaminase	WP_000665120.1	Not Essential
335	b0325	chromosome	Protein_Coding	protein_coding	38	65.8	50.2	Neutral	yahK	broad specificity NADPH-dependent aldehyde reductase, Zn-containing	WP_000692754.1	Not Essential
336	b0326	chromosome	Protein_Coding	protein_coding	63	28.6	7.77778	Underrepresented	yahL	uncharacterized protein	WP_001301260.1	Not Essential
337	b0327	chromosome	Protein_Coding	protein_coding	11	72.7	28.625	Neutral	yahM	uncharacterized protein	WP_000290616.1	Not Essential
338	b0328	chromosome	Protein_Coding	protein_coding	38	52.6	49.55	Neutral	yahN	amino acid exporter for proline, lysine, glutamate, homoserine	WP_000983410.1	Not Essential
339	b0329	chromosome	Protein_Coding	protein_coding	16	25	16	Neutral	yahO	periplasmic protein, function unknown, YhcN family	WP_000691956.1	Not Essential
340	b0330	chromosome	Protein_Coding	protein_coding	62	54.8	39.2647	Neutral	prpR	propionate catabolism operon regulatory protein	WP_000941041.1	Not Essential
341	b0331	chromosome	Protein_Coding	protein_coding	28	64.3	42.1111	Neutral	prpB	2-methylisocitrate lyase	WP_000052206.1	Not Essential
342	b0333	chromosome	Protein_Coding	protein_coding	38	50	46.3158	Neutral	prpC	2-methylcitrate synthase	WP_001285927.1	Not Essential
343	b0334	chromosome	Protein_Coding	protein_coding	40	57.5	37.087	Neutral	prpD	2-methylcitrate dehydratase	WP_001275859.1	Not Essential
344	b0335	chromosome	Protein_Coding	protein_coding	46	76.1	70	Neutral	prpE	propionate--CoA ligase	WP_000010288.1	Not Essential
345	b0336	chromosome	Protein_Coding	protein_coding	49	53.1	48.9615	Neutral	codB	cytosine transporter	WP_000076233.1	Not Essential
346	b0337	chromosome	Protein_Coding	protein_coding	47	72.3	42.1471	Neutral	codA	cytosine/isoguanine deaminase	WP_001301240.1	Not Essential
347	b0338	chromosome	Protein_Coding	protein_coding	30	56.7	42.7647	Neutral	cynR	transcriptional activator of cyn operon; autorepressor	WP_000952503.1	Not Essential
348	b0339	chromosome	Protein_Coding	protein_coding	20	50	28.8	Neutral	cynT	carbonic anhydrase	WP_000658652.1	Not Essential
349	b0340	chromosome	Protein_Coding	protein_coding	17	88.2	63.4	Neutral	cynS	cyanate aminohydrolase	WP_000616243.1	Not Essential
350	b0341	chromosome	Protein_Coding	protein_coding	36	66.7	47	Neutral	cynX	putative cyanate transporter	WP_000927953.1	Not Essential
351	b0342	chromosome	Protein_Coding	protein_coding	41	2.4	1	Underrepresented	lacA	thiogalactoside acetyltransferase	WP_001335915.1	Not Essential
352	b0343	chromosome	Protein_Coding	protein_coding	74	0	0	Underrepresented	lacY	lactose permease	WP_000291549.1	Not Essential
353	b0344	chromosome	Protein_Coding	protein_coding	103	3.9	180	Underrepresented	lacZ	beta-D-galactosidase	WP_000177906.1	Not Essential
354	b0345	chromosome	Protein_Coding	protein_coding	31	16.1	99.8	Underrepresented	lacI	lactose-inducible lac operon transcriptional repressor	WP_000805902.1	Not Essential
355	b0346	chromosome	Protein_Coding	protein_coding	30	50	58.2	Neutral	mhpR	mhp operon transcriptional activator	WP_001301325.1	Not Essential
356	b0347	chromosome	Protein_Coding	protein_coding	55	74.5	54.7073	Neutral	mhpA	3-(3-hydroxyphenyl)propionate hydroxylase	WP_001007407.1	Not Essential
357	b0348	chromosome	Protein_Coding	protein_coding	22	72.7	36.0625	Neutral	mhpB	2,3-dihydroxyphenylpropionate 1,2-dioxygenase	WP_000543457.1	Not Essential
358	b0349	chromosome	Protein_Coding	protein_coding	28	50	33.9286	Neutral	mhpC	2-hydroxy-6-ketonona-2,4-dienedioic acid hydrolase	WP_000121907.1	Not Essential
359	b0350	chromosome	Protein_Coding	protein_coding	28	46.4	65.5385	Neutral	mhpD	2-keto-4-pentenoate hydratase	WP_000160710.1	Not Essential
360	b0351	chromosome	Protein_Coding	protein_coding	33	60.6	61.85	Neutral	mhpF	acetaldehyde-CoA dehydrogenase II, NAD-binding	WP_000044314.1	Not Essential
361	b0352	chromosome	Protein_Coding	protein_coding	32	71.9	48.9565	Neutral	mhpE	4-hyroxy-2-oxovalerate/4-hydroxy-2-oxopentanoic acid aldolase, class I	WP_001013499.1	Not Essential
362	b0353	chromosome	Protein_Coding	protein_coding	37	62.2	37.2609	Neutral	mhpT	3-hydroxyphenylpropionic transporter	WP_000107627.1	Not Essential
363	b0354	chromosome	Protein_Coding	protein_coding	24	66.7	23.5	Neutral	yaiL	DUF2058 family protein	WP_001096705.1	Not Essential
364	b0355	chromosome	Protein_Coding	protein_coding	37	78.4	30.1724	Neutral	frmB	S-formylglutathione hydrolase	WP_000419081.1	Not Essential
365	b0356	chromosome	Protein_Coding	protein_coding	39	59	22.1739	Neutral	frmA	alcohol dehydrogenase class III; glutathione-dependent formaldehyde dehydrogenase	WP_000842106.1	Not Essential
366	b0357	chromosome	Protein_Coding	protein_coding	11	54.5	11.8333	Neutral	frmR	regulator protein that represses frmRAB operon	WP_001141271.1	Not Essential
367	b0358	chromosome	Protein_Coding	protein_coding	52	67.3	38.9143	Neutral	yaiO	outer membrane protein	WP_000596084.1	Not Essential
368	b4579	chromosome	Pseudogene	pseudogene	42	66.7	13.3929	Neutral	yaiX	---	---	Not Essential
369	b0360	chromosome	Protein_Coding	protein_coding	12	91.7	20.4545	Neutral	insC1	IS2 repressor TnpA	WP_000567766.1	Not Essential
370	b0361	chromosome	Protein_Coding	protein_coding	34	82.4	33.1429	Neutral	insD1	IS2 transposase TnpB	WP_000376502.1	Not Essential
371	b0363	chromosome	Protein_Coding	protein_coding	76	67.1	34.3333	Neutral	yaiP	putative family 2 glycosyltransferase	WP_000860444.1	Not Essential
372	b0364	chromosome	Protein_Coding	protein_coding	33	24.2	20.875	Regional	yaiS	putative PIG-L family deacetylase	WP_000362028.1	Not Essential
373	b0365	chromosome	Protein_Coding	protein_coding	27	59.3	65	Neutral	tauA	taurine ABC transporter periplasmic binding protein	WP_001018417.1	Not Essential
374	b0366	chromosome	Protein_Coding	protein_coding	24	75	33.5556	Neutral	tauB	taurine ABC transporter ATPase	WP_000939375.1	Not Essential
375	b0367	chromosome	Protein_Coding	protein_coding	32	53.1	30.4706	Neutral	tauC	taurine ABC transporter permease	WP_000114620.1	Not Essential
376	b0368	chromosome	Protein_Coding	protein_coding	39	51.3	41.95	Neutral	tauD	taurine dioxygenase, 2-oxoglutarate-dependent	WP_000004027.1	Not Essential
377	b0369	chromosome	Protein_Coding	protein_coding	31	0	0	Underrepresented	hemB	5-aminolevulinate dehydratase (porphobilinogen synthase)	WP_001295337.1	Essential
378	b4580	chromosome	Pseudogene	pseudogene	139	78.4	44.8349	Neutral	yaiT	---	---	Not Essential
379	b0372	chromosome	Protein_Coding	protein_coding	33	84.8	35.1429	Neutral	insF1	IS3 transposase B	WP_000878218.1	Not Essential
380	b4580	chromosome	Pseudogene	pseudogene	139	78.4	44.8349	Neutral	yaiT	---	---	Not Essential
381	b0375	chromosome	Protein_Coding	protein_coding	55	38.2	15.5714	Regional	yaiV	putative transcriptional regulator	WP_001295335.1	Not Essential
382	b0376	chromosome	Protein_Coding	protein_coding	50	70	47.0571	Neutral	ampH	D-alanyl-D-alanine-carboxypeptidase/endopeptidase; penicillin-binding protein; weak beta-lactamase	WP_000830741.1	Not Essential
383	b0377	chromosome	Protein_Coding	protein_coding	55	65.5	38.7778	Neutral	sbmA	peptide antibiotic transporter	WP_001301663.1	Not Essential
384	b0378	chromosome	Protein_Coding	protein_coding	39	69.2	22.3704	Neutral	yaiW	microcin Bac7 uptake protein; outer membrane surface-exposed lipoprotein	WP_000092067.1	Not Essential
385	b0379	chromosome	Protein_Coding	protein_coding	12	58.3	8.28571	Neutral	yaiY	DUF2755 family inner membrane protein	WP_000763151.1	Not Essential
386	b0380	chromosome	Protein_Coding	protein_coding	11	72.7	62.75	Neutral	yaiZ	DUF2754 family putative inner membrane protein	WP_001295334.1	Not Essential
387	b0381	chromosome	Protein_Coding	protein_coding	40	75	32.4	Neutral	ddlA	D-alanine-D-alanine ligase A	WP_000413677.1	Not Essential
388	b0382	chromosome	Protein_Coding	protein_coding	13	46.2	9.5	Neutral	iraP	anti-RssB factor, RpoS stabilzer during Pi starvation; anti-adapter protein	WP_000792970.1	Not Essential
389	b0383	chromosome	Protein_Coding	protein_coding	57	54.4	39.7097	Neutral	phoA	bacterial alkaline phosphatase	WP_000814403.1	Not Essential
390	b0384	chromosome	Protein_Coding	protein_coding	13	76.9	28	Neutral	psiF	PsiF family protein	WP_001295332.1	Not Essential
391	b0385	chromosome	Protein_Coding	protein_coding	50	66	45.303	Neutral	yaiC	diguanylate cyclase, cellulose regualtor	WP_000484048.1	Not Essential
392	b0386	chromosome	Protein_Coding	protein_coding	28	46.4	24.4615	Neutral	proC	pyrroline-5-carboxylate reductase, NAD(P)-binding	WP_001295331.1	Not Essential
393	b0387	chromosome	Protein_Coding	protein_coding	20	70	23.2857	Neutral	yaiI	UPF0178 family protein	WP_000158159.1	Not Essential
394	b0388	chromosome	Protein_Coding	protein_coding	19	68.4	52.9231	Neutral	aroL	shikimate kinase II	WP_000193393.1	Not Essential
395	b0389	chromosome	Protein_Coding	protein_coding	8	75	54.3333	Neutral	yaiA	OxyR-regulated conserved protein	WP_001142439.1	Not Essential
396	b0390	chromosome	Protein_Coding	protein_coding	32	71.9	30.2174	Neutral	aroM	AroM family protein	WP_001276420.1	Not Essential
397	b0391	chromosome	Protein_Coding	protein_coding	11	81.8	39.2222	Neutral	yaiE	UPF0345 family protein	WP_000941942.1	Not Essential
398	b0392	chromosome	Pseudogene	pseudogene	15	66.7	23.6	Neutral	ykiA	---	---	Not Essential
399	b0393	chromosome	Protein_Coding	protein_coding	23	60.9	22.2143	Neutral	rdgC	nucleoid-associated ssDNA and dsDNA binding protein; competitive inhibitor of RecA function	WP_001298537.1	Not Essential
400	b0394	chromosome	Protein_Coding	protein_coding	37	64.9	31.2917	Neutral	mak	manno(fructo)kinase	WP_001219309.1	Not Essential
401	b0396	chromosome	Protein_Coding	protein_coding	60	76.7	46.1304	Neutral	araJ	L-arabinose-inducible putative transporter, MFS family	WP_001326926.1	Not Essential
402	b0397	chromosome	Protein_Coding	protein_coding	95	69.5	34.1364	Neutral	sbcC	exonuclease, dsDNA, ATP-dependent	WP_000698951.1	Not Essential
403	b0398	chromosome	Protein_Coding	protein_coding	48	66.7	36.375	Neutral	sbcD	exonuclease, dsDNA, ATP-dependent	WP_001221319.1	Not Essential
404	b0399	chromosome	Protein_Coding	protein_coding	22	68.2	43.6667	Neutral	phoB	response regulator in two-component regulatory system with PhoR	WP_000113933.1	Not Essential
405	b0400	chromosome	Protein_Coding	protein_coding	54	55.6	36.4667	Neutral	phoR	sensory histidine kinase in two-component regulatory system with PhoB	WP_000893623.1	Not Essential
406	b0401	chromosome	Protein_Coding	protein_coding	66	54.5	27.3333	Neutral	brnQ	branched-chain amino acid transport system 2 carrier protein; LIV-II transport system for Ile, Leu, and Val	WP_000149639.1	Not Essential
407	b0402	chromosome	Protein_Coding	protein_coding	69	76.8	52.2075	Neutral	proY	proline-specific permease	WP_001295329.1	Not Essential
408	b0403	chromosome	Protein_Coding	protein_coding	73	79.5	48.1034	Neutral	malZ	maltodextrin glucosidase	WP_000930752.1	Not Essential
409	b0404	chromosome	Protein_Coding	protein_coding	23	65.2	39	Neutral	acpH	acyl carrier protein (ACP) phosphodiesterase; ACP hydrolyase	WP_001009885.1	Not Essential
410	b0405	chromosome	Protein_Coding	protein_coding	44	54.5	12.4583	Neutral	queA	S-adenosylmethionine:tRNA ribosyltransferase-isomerase	WP_001266503.1	Not Essential
411	b0406	chromosome	Protein_Coding	protein_coding	50	36	24.4444	Neutral	tgt	tRNA-guanine transglycosylase	WP_000667319.1	Not Essential
412	b0407	chromosome	Protein_Coding	protein_coding	14	7.1	36	Underrepresented	yajC	SecYEG protein translocase auxillary subunit	WP_000007629.1	Not Essential
413	b0408	chromosome	Protein_Coding	protein_coding	77	0	0	Underrepresented	secD	SecYEG protein translocase auxillary subunit	WP_000934822.1	Essential
414	b0409	chromosome	Protein_Coding	protein_coding	49	0	0	Underrepresented	secF	SecYEG protein translocase auxillary subunit	WP_000046637.1	Essential
415	b0410	chromosome	Protein_Coding	protein_coding	18	72.2	47.2308	Neutral	yajD	HNH nuclease family protein	WP_000974813.1	Not Essential
416	b0411	chromosome	Protein_Coding	protein_coding	54	74.1	37.225	Neutral	tsx	nucleoside channel, receptor of phage T6 and colicin K	WP_001295328.1	Not Essential
417	b0412	chromosome	Protein_Coding	protein_coding	24	66.7	76.5625	Neutral	yajI	putative lipoprotein	WP_001326929.1	Not Essential
418	b0413	chromosome	Protein_Coding	protein_coding	16	31.2	9.4	Regional	nrdR	Nrd regulon repressor	WP_000543535.1	Not Essential
419	b0414	chromosome	Protein_Coding	protein_coding	44	2.3	26	Underrepresented	ribD	fused diaminohydroxyphosphoribosylaminopyrimidine deaminase and 5-amino-6-(5-phosphoribosylamino) uracil reductase	WP_001150457.1	Essential
420	b0415	chromosome	Protein_Coding	protein_coding	16	0	0	Underrepresented	ribE	riboflavin synthase beta chain	WP_001021161.1	Essential
421	b0416	chromosome	Protein_Coding	protein_coding	19	5.3	28	Underrepresented	nusB	transcription antitermination protein	WP_000801125.1	Essential
422	b0417	chromosome	Protein_Coding	protein_coding	37	0	0	Underrepresented	thiL	thiamine monophosphate kinase	WP_000742109.1	Essential
423	b0418	chromosome	Protein_Coding	protein_coding	17	76.5	23.4615	Neutral	pgpA	phosphatidylglycerophosphatase A	WP_000154044.1	Not Essential
424	b0419	chromosome	Protein_Coding	protein_coding	37	67.6	43.64	Neutral	yajO	2-carboxybenzaldehyde reductase	WP_001199800.1	Not Essential
425	b0420	chromosome	Protein_Coding	protein_coding	59	1.7	19	Underrepresented	dxs	1-deoxyxylulose-5-phosphate synthase, thiamine triphosphate-binding, FAD-requiring	WP_000006797.1	Essential
426	b0421	chromosome	Protein_Coding	protein_coding	36	0	0	Underrepresented	ispA	geranyltranstransferase	WP_000347217.1	Essential
427	b0422	chromosome	Protein_Coding	protein_coding	7	57.1	13.25	Regional	xseB	exonuclease VII small subunit	WP_001124935.1	Not Essential
428	b0423	chromosome	Protein_Coding	protein_coding	53	58.5	29.0968	Neutral	thiI	tRNA s(4)U8 sulfurtransferase	WP_000668662.1	Not Essential
429	b0424	chromosome	Protein_Coding	protein_coding	22	59.1	22.9231	Neutral	yajL	oxidative-stress-resistance chaperone	WP_001276305.1	Not Essential
430	b0425	chromosome	Protein_Coding	protein_coding	38	73.7	28.6071	Neutral	panE	2-dehydropantoate reductase, NADPH-specific	WP_000705865.1	Not Essential
431	b0426	chromosome	Protein_Coding	protein_coding	12	50	11.1667	Neutral	yajQ	phage Phi6 host factor, ATP/GTP binding protein	WP_001138904.1	Not Essential
432	b0427	chromosome	Protein_Coding	protein_coding	45	40	10.7778	Neutral	yajR	putative transporter	WP_001000963.1	Not Essential
433	b0428	chromosome	Protein_Coding	protein_coding	43	20.9	21.2222	Underrepresented	cyoE	protoheme IX farnesyltransferase	WP_000971336.1	Not Essential
434	b0429	chromosome	Protein_Coding	protein_coding	13	7.7	11	Underrepresented	cyoD	cytochrome o ubiquinol oxidase subunit IV	WP_000019869.1	Not Essential
435	b0430	chromosome	Protein_Coding	protein_coding	18	11.1	1.5	Underrepresented	cyoC	cytochrome o ubiquinol oxidase subunit III	WP_000179819.1	Not Essential
436	b0431	chromosome	Protein_Coding	protein_coding	81	14.8	20.25	Underrepresented	cyoB	cytochrome o ubiquinol oxidase subunit I	WP_000467180.1	Not Essential
437	b0432	chromosome	Protein_Coding	protein_coding	38	23.7	11.5556	Underrepresented	cyoA	cytochrome o ubiquinol oxidase subunit II	WP_001239436.1	Not Essential
438	b0433	chromosome	Protein_Coding	protein_coding	64	68.8	49.3182	Neutral	ampG	muropeptide transporter	WP_000098429.1	Not Essential
439	b0434	chromosome	Protein_Coding	protein_coding	23	52.2	56.25	Neutral	yajG	putative lipoprotein	WP_001295326.1	Not Essential
440	b0435	chromosome	Protein_Coding	protein_coding	18	77.8	48.2857	Neutral	bolA	stationary-phase morphogene, transcriptional repressor for mreB; also regulator for dacA, dacC, and ampC	WP_000973448.1	Not Essential
441	b0436	chromosome	Protein_Coding	protein_coding	42	59.5	26.36	Neutral	tig	peptidyl-prolyl cis/trans isomerase (trigger factor)	WP_001198386.1	Not Essential
442	b0437	chromosome	Protein_Coding	protein_coding	26	3.8	6	Underrepresented	clpP	proteolytic subunit of ClpA-ClpP and ClpX-ClpP ATP-dependent serine proteases	WP_000122253.1	Not Essential
443	b0438	chromosome	Protein_Coding	protein_coding	47	2.1	1	Underrepresented	clpX	ATPase and specificity subunit of ClpX-ClpP ATP-dependent serine protease	WP_000130305.1	Not Essential
444	b0439	chromosome	Protein_Coding	protein_coding	80	2.5	2	Underrepresented	lon	DNA-binding ATP-dependent protease La	WP_001295325.1	Not Essential
445	b0440	chromosome	Protein_Coding	protein_coding	18	66.7	25.4167	Neutral	hupB	HU, DNA-binding transcriptional regulator, beta subunit	WP_001043542.1	Not Essential
446	b0441	chromosome	Protein_Coding	protein_coding	68	54.4	34.6216	Neutral	ppiD	periplasmic folding chaperone, has an inactive PPIase domain	WP_000969372.1	Not Essential
447	b0442	chromosome	Protein_Coding	protein_coding	17	64.7	35.3636	Neutral	ybaV	putative competence-suppressing periplasmic helix-hairpin-helix DNA-binding protein	WP_000680312.1	Not Essential
448	b0443	chromosome	Protein_Coding	protein_coding	26	84.6	32.9091	Neutral	fadM	long-chain acyl-CoA thioesterase III	WP_001194534.1	Not Essential
449	b0444	chromosome	Protein_Coding	protein_coding	33	66.7	55.8636	Neutral	queC	7-cyano-7-deazaguanine (preQ0) synthase; queuosine biosynthesis	WP_000817220.1	Not Essential
450	b0445	chromosome	Protein_Coding	protein_coding	73	72.6	27.1132	Neutral	ybaE	putative ABC transporter periplasmic binding protein	WP_001238234.1	Not Essential
451	b0446	chromosome	Protein_Coding	protein_coding	36	77.8	32.4286	Neutral	cof	thiamine pyrimidine pyrophosphate hydrolase; HMP-PP phosphatase	WP_001336137.1	Not Essential
452	b0447	chromosome	Protein_Coding	protein_coding	21	38.1	19.125	Neutral	ybaO	putative DNA-binding transcriptional regulator	WP_000884589.1	Not Essential
453	b0448	chromosome	Protein_Coding	protein_coding	70	85.7	49.9833	Neutral	mdlA	putative multidrug ABC transporter ATPase	WP_001235649.1	Not Essential
454	b0449	chromosome	Protein_Coding	protein_coding	67	71.6	49.6875	Neutral	mdlB	putative multidrug ABC transporter ATPase	WP_001256201.1	Not Essential
455	b0450	chromosome	Protein_Coding	protein_coding	12	58.3	52.8571	Neutral	glnK	nitrogen assimilation regulatory protein for GlnL, GlnE, and AmtB	WP_000780338.1	Not Essential
456	b0451	chromosome	Protein_Coding	protein_coding	44	65.9	35.0345	Neutral	amtB	ammonium transporter	WP_000685029.1	Not Essential
457	b0452	chromosome	Protein_Coding	protein_coding	33	63.6	32.5714	Neutral	tesB	acyl-CoA thioesterase 2	WP_000075876.1	Not Essential
458	b0453	chromosome	Protein_Coding	protein_coding	23	65.2	26.1333	Neutral	ybaY	outer membrane lipoprotein	WP_000779842.1	Not Essential
459	b0454	chromosome	Protein_Coding	protein_coding	15	53.3	16.875	Neutral	ybaZ	excision repair protein, alkyltransferase-like protein ATL	WP_001300427.1	Not Essential
460	b0455	chromosome	RNA	SRP_RNA	3	0	0	Neutral	ffs	4.5S sRNA component of Signal Recognition Particle (SRP)	---	Essential
461	b0456	chromosome	Protein_Coding	protein_coding	13	46.2	28	Neutral	ybaA	DUF1428 family protein	WP_000878140.1	Not Essential
462	b0457	chromosome	Protein_Coding	protein_coding	80	62.5	28.84	Neutral	ylaB	putative membrane-anchored cyclic-di-GMP phosphodiesterase	WP_001310610.1	Not Essential
463	b0458	chromosome	Protein_Coding	protein_coding	28	67.9	18.6842	Neutral	ylaC	DUF1449 family inner membrane protein	WP_000136192.1	Not Essential
464	b0459	chromosome	Protein_Coding	protein_coding	30	70	53.2381	Neutral	maa	maltose O-acetyltransferase	WP_000102564.1	Not Essential
465	b0460	chromosome	Protein_Coding	protein_coding	17	23.5	7.25	Underrepresented	hha	modulator of gene expression, with H-NS	WP_001291435.1	Not Essential
466	b0461	chromosome	Protein_Coding	protein_coding	24	62.5	12.2667	Neutral	tomB	Hha toxicity attenuator; conjugation-related protein	WP_000344800.1	Not Essential
467	b0462	chromosome	Protein_Coding	protein_coding	122	65.6	70.0125	Neutral	acrB	multidrug efflux system protein	WP_001132469.1	Not Essential
468	b0463	chromosome	Protein_Coding	protein_coding	50	74	48.7838	Neutral	acrA	multidrug efflux system	WP_001295324.1	Not Essential
469	b0464	chromosome	Protein_Coding	protein_coding	33	33.3	9.09091	Regional	acrR	transcriptional repressor	WP_000101737.1	Not Essential
470	b0465	chromosome	Protein_Coding	protein_coding	116	69.8	46.1975	Neutral	mscK	mechanosensitive channel protein, intermediate conductance, K+ regulated	WP_000177732.1	Not Essential
471	b0466	chromosome	Protein_Coding	protein_coding	6	50	55	Neutral	ybaM	DUF2496 family protein	WP_000051153.1	Not Essential
472	b0467	chromosome	Protein_Coding	protein_coding	11	63.6	25.4286	Neutral	priC	primosomal replication protein N''	WP_000844874.1	Not Essential
473	b0468	chromosome	Protein_Coding	protein_coding	15	73.3	52.5455	Neutral	ybaN	DUF454 family inner membrane protein	WP_001188905.1	Not Essential
474	b0469	chromosome	Protein_Coding	protein_coding	18	55.6	31.3	Neutral	apt	adenine phosphoribosyltransferase	WP_000127356.1	Not Essential
475	b0470	chromosome	Protein_Coding	protein_coding	52	0	0	Underrepresented	dnaX	DNA polymerase III/DNA elongation factor III, tau and gamma subunits	WP_000122013.1	Essential
476	b0471	chromosome	Protein_Coding	protein_coding	7	42.9	26.6667	Neutral	ybaB	DNA-binding protein, putative nucleoid-associated protein	WP_000467098.1	Not Essential
477	b0472	chromosome	Protein_Coding	protein_coding	14	50	77.4286	Neutral	recR	gap repair protein	WP_001195025.1	Not Essential
478	b0473	chromosome	Protein_Coding	protein_coding	56	67.9	51.2105	Neutral	htpG	protein refolding molecular co-chaperone Hsp90, Hsp70-dependent; heat-shock protein; ATPase	WP_000678201.1	Not Essential
479	b0474	chromosome	Protein_Coding	protein_coding	27	3.7	7	Underrepresented	adk	adenylate kinase	WP_001220233.1	Essential
480	b0475	chromosome	Protein_Coding	protein_coding	43	0	0	Underrepresented	hemH	ferrochelatase	WP_001250103.1	Essential
481	b0476	chromosome	Protein_Coding	protein_coding	42	59.5	42.64	Regional	aes	acetyl esterase	WP_000801813.1	Not Essential
482	b0477	chromosome	Protein_Coding	protein_coding	63	61.9	45.8718	Neutral	gsk	inosine/guanosine kinase	WP_000671574.1	Not Essential
483	b0478	chromosome	Protein_Coding	protein_coding	57	75.4	53.4651	Neutral	ybaL	inner membrane putative NAD(P)-binding transporter	WP_000546237.1	Not Essential
484	b0479	chromosome	Protein_Coding	protein_coding	54	50	24.4444	Neutral	fsr	putative fosmidomycin efflux system protein	WP_001251608.1	Not Essential
485	b0480	chromosome	Protein_Coding	protein_coding	71	66.2	23.2128	Neutral	ushA	bifunctional UDP-sugar hydrolase/5'-nucleotidase	WP_000771748.1	Not Essential
486	b0481	chromosome	Protein_Coding	protein_coding	18	50	28.6667	Neutral	ybaK	Cys-tRNA(Pro)/Cys-tRNA(Cys) deacylase	WP_000186631.1	Not Essential
487	b4585	chromosome	RNA	antisense_RNA	7	42.9	7	Neutral	chiX	sRNA antisense regulator of OM chitoporin ChiP(YbfM), Hfq-dependent	---	Not Essential
488	b0482	chromosome	Protein_Coding	protein_coding	32	68.8	42.5455	Neutral	ybaP	TraB family protein	WP_000365173.1	Not Essential
489	b0483	chromosome	Protein_Coding	protein_coding	13	53.8	25	Neutral	ybaQ	putative DNA-binding transcriptional regulator	WP_000806442.1	Not Essential
490	b0484	chromosome	Protein_Coding	protein_coding	84	46.4	27.7692	Neutral	copA	copper transporter	WP_000083955.1	Not Essential
491	b0485	chromosome	Protein_Coding	protein_coding	43	62.8	26.2222	Neutral	glsA	glutaminase 1	WP_000883034.1	Not Essential
492	b0486	chromosome	Protein_Coding	protein_coding	61	78.7	37.3333	Neutral	ybaT	putative amino acid transporter	WP_000982172.1	Not Essential
493	b0487	chromosome	Protein_Coding	protein_coding	9	44.4	68	Neutral	cueR	copper-responsive regulon transcriptional regulator	WP_001026747.1	Not Essential
494	b0488	chromosome	Protein_Coding	protein_coding	14	78.6	24.7273	Neutral	ybbJ	inner membrane protein; stimulator of the QmcA suppressor of ftsH-htpX	WP_000970323.1	Not Essential
495	b0489	chromosome	Protein_Coding	protein_coding	34	61.8	30.8095	Neutral	qmcA	PHB domain membrane-anchored putative protease	WP_000904502.1	Not Essential
496	b0490	chromosome	Protein_Coding	protein_coding	38	60.5	11.6957	Neutral	fetA	iron export ABC transporter ATPase; peroxide resistance protein	WP_001157540.1	Not Essential
497	b0491	chromosome	Protein_Coding	protein_coding	50	50	16.44	Neutral	fetB	iron export ABC transporter permease; peroxide resistance protein	WP_001295323.1	Not Essential
498	b0492	chromosome	Protein_Coding	protein_coding	21	61.9	35.6923	Neutral	ybbN	DnaK co-chaperone, thioredoxin-like protein	WP_001300573.1	Not Essential
499	b0493	chromosome	Protein_Coding	protein_coding	28	64.3	37.1111	Neutral	ybbO	putative oxidoreductase	WP_000148959.1	Not Essential
500	b0494	chromosome	Protein_Coding	protein_coding	22	63.6	21.5	Neutral	tesA	acyl-CoA thioesterase 1 and protease I and lysophospholipase L1	WP_001297298.1	Not Essential
501	b0495	chromosome	Protein_Coding	protein_coding	17	70.6	36.9167	Neutral	ybbA	putative ABC transporter ATPase	WP_001110573.1	Not Essential
502	b0496	chromosome	Protein_Coding	protein_coding	80	66.2	30.6415	Neutral	ybbP	putative ABC transporter permease	WP_000561872.1	Not Essential
503	b0497	chromosome	Protein_Coding	protein_coding	179	55.9	40.64	Neutral	rhsD	Rhs protein with DUF4329 family putative toxin domain; putative neighboring cell growth inhibitor	WP_000014739.1	Not Essential
504	b0498	chromosome	Protein_Coding	protein_coding	42	9.5	18.25	Underrepresented	ybbC	putative immunity protein	WP_000877768.1	Not Essential
505	b0499	chromosome	Pseudogene	pseudogene	53	30.2	25.0625	Regional	rhsH	---	---	Not Essential
506	b0501	chromosome	Pseudogene	pseudogene	47	12.8	12.8333	Underrepresented	ybbD	---	---	Not Essential
507	b4632	chromosome	Pseudogene	pseudogene	4	50	33	Neutral	ylbI	---	---	Not Essential
508	b0502	chromosome	Pseudogene	pseudogene	20	60	26.1667	Neutral	ylbG	---	---	Not Essential
509	b0503	chromosome	Protein_Coding	protein_coding	42	71.4	42.0333	Neutral	mnmH	tRNA 2-selenouridine synthase, selenophosphate-dependent	WP_001157938.1	Not Essential
510	b0504	chromosome	Protein_Coding	protein_coding	33	45.5	31	Neutral	allS	allD operon transcriptional activator	WP_000460145.1	Not Essential
511	b0505	chromosome	Protein_Coding	protein_coding	19	73.7	25.7857	Neutral	allA	ureidoglycolate lyase, releasing urea	WP_000776377.1	Not Essential
512	b0506	chromosome	Protein_Coding	protein_coding	36	55.6	23.9	Neutral	allR	glyoxylate-inducible transcriptional repressor of all and gcl operons	WP_000141275.1	Not Essential
513	b0507	chromosome	Protein_Coding	protein_coding	72	51.4	39.8919	Neutral	gcl	glyoxylate carboligase	WP_001096881.1	Not Essential
514	b0508	chromosome	Protein_Coding	protein_coding	47	34	12	Neutral	hyi	hydroxypyruvate isomerase	WP_000943544.1	Not Essential
515	b0509	chromosome	Protein_Coding	protein_coding	35	62.9	38.6364	Neutral	glxR	tartronate semialdehyde reductase, NADH-dependent	WP_000765839.1	Not Essential
516	b0511	chromosome	Protein_Coding	protein_coding	96	30.2	23.6552	Regional	ybbW	putative allantoin transporter	WP_000401100.1	Not Essential
517	b0512	chromosome	Protein_Coding	protein_coding	51	54.9	42.5714	Neutral	allB	allantoinase	WP_000006900.1	Not Essential
518	b0513	chromosome	Protein_Coding	protein_coding	71	54.9	28.6154	Neutral	ybbY	putative uracil/xanthine transporter	WP_001302767.1	Not Essential
519	b0514	chromosome	Protein_Coding	protein_coding	42	42.9	30.3889	Neutral	glxK	glycerate kinase II	WP_001333621.1	Not Essential
520	b0515	chromosome	Protein_Coding	protein_coding	50	62	22.4839	Neutral	allE	S-ureidoglycine aminohydrolase	WP_000540997.1	Not Essential
521	b0516	chromosome	Protein_Coding	protein_coding	52	67.3	27.6571	Neutral	allC	allantoate amidohydrolase	WP_001310618.1	Not Essential
522	b0517	chromosome	Protein_Coding	protein_coding	55	54.5	34.6667	Neutral	allD	ureidoglycolate dehydrogenase	WP_000703900.1	Not Essential
523	b0518	chromosome	Protein_Coding	protein_coding	58	62.1	27.3333	Neutral	fdrA	putative NAD(P)-binding acyl-CoA synthetase	WP_000580829.1	Not Essential
524	b4572	chromosome	Protein_Coding	protein_coding	38	60.5	45	Neutral	ylbE	NO-induced DUF1116 protein	WP_000495367.1	Not Essential
525	b0520	chromosome	Protein_Coding	protein_coding	30	66.7	50.7	Neutral	ylbF	putative anaerobic allantoin catabolic oxamate carbamoyltransferase; DUF2877 family protein	WP_000152519.1	Not Essential
526	b0521	chromosome	Protein_Coding	protein_coding	26	53.8	29.2857	Neutral	ybcF	putative carbonate kinase	WP_000855379.1	Not Essential
527	b0522	chromosome	Protein_Coding	protein_coding	35	28.6	14.5	Regional	purK	N5-carboxyaminoimidazole ribonucleotide synthase	WP_000815571.1	Not Essential
528	b0523	chromosome	Protein_Coding	protein_coding	13	38.5	15.4	Underrepresented	purE	N5-carboxyaminoimidazole ribonucleotide mutase	WP_001295318.1	Not Essential
529	b0524	chromosome	Protein_Coding	protein_coding	17	0	0	Underrepresented	lpxH	UDP-2,3-diacylglucosamine pyrophosphohydrolase	WP_000212247.1	Essential
530	b0525	chromosome	Protein_Coding	protein_coding	19	0	0	Underrepresented	ppiB	peptidyl-prolyl cis-trans isomerase B (rotamase B)	WP_000255997.1	Not Essential
531	b0526	chromosome	Protein_Coding	protein_coding	45	2.2	101	Underrepresented	cysS	cysteinyl-tRNA synthetase	WP_000912385.1	Essential
532	b0527	chromosome	Protein_Coding	protein_coding	21	66.7	63	Neutral	ybcI	DUF457 family inner membrane protein	WP_001143542.1	Not Essential
533	b0528	chromosome	Protein_Coding	protein_coding	3	100	7	Neutral	ybcJ	ribosome-associated protein; putative RNA-binding protein	WP_000190288.1	Not Essential
534	b0529	chromosome	Protein_Coding	protein_coding	29	6.9	95	Underrepresented	folD	bifunctional 5,10-methylene-tetrahydrofolate dehydrogenase/ 5,10-methylene-tetrahydrofolate cyclohydrolase	WP_000729160.1	Essential
535	b0530	chromosome	Protein_Coding	protein_coding	32	25	7.625	Underrepresented	sfmA	FimA homolog, function unknown	WP_000776555.1	Not Essential
536	b0531	chromosome	Protein_Coding	protein_coding	45	26.7	14	Regional	sfmC	putative periplasmic pilus chaperone	WP_000988364.1	Not Essential
537	b0532	chromosome	Protein_Coding	protein_coding	169	49.1	21.8675	Neutral	sfmD	putative outer membrane export usher protein	WP_001333622.1	Not Essential
538	b0533	chromosome	Protein_Coding	protein_coding	69	39.1	13.7407	Regional	sfmH	FimA homolog, function unknown	WP_001240464.1	Not Essential
539	b0534	chromosome	Protein_Coding	protein_coding	32	50	24.1875	Regional	sfmF	FimA homolog, function unknown	WP_001255230.1	Not Essential
540	b0535	chromosome	Protein_Coding	protein_coding	57	19.3	10.5455	Underrepresented	sfmZ	response regulator family protein	WP_000805428.1	Not Essential
541	b0536	chromosome	RNA	tRNA	3	0	0	Underrepresented	argU	tRNA-Arg	---	Essential
542	b0537	chromosome	Protein_Coding	protein_coding	44	68.2	29.2333	Neutral	intD	DLP12 prophage; putative phage integrase	WP_001350488.1	Not Essential
543	b4633	chromosome	Pseudogene	pseudogene	3	66.7	30	Neutral	xisD	---	---	Not Essential
544	b0539	chromosome	Pseudogene	pseudogene	9	100	33.1111	Neutral	exoD	---	---	Not Essential
545	b4508	chromosome	Pseudogene	pseudogene	17	82.4	29.0714	Neutral	peaD	---	---	Not Essential
546	b0542	chromosome	Pseudogene	pseudogene	66	81.8	31.7778	Neutral	renD	---	---	Not Essential
547	b0543	chromosome	Protein_Coding	protein_coding	27	33.3	11.1111	Underrepresented	emrE	DLP12 prophage; multidrug resistance protein	WP_001070439.1	Not Essential
548	b0544	chromosome	Protein_Coding	protein_coding	129	10.1	11.3077	Underrepresented	ybcK	DLP12 prophage; putative recombinase	WP_000709082.1	Not Essential
549	b0545	chromosome	Protein_Coding	protein_coding	38	57.9	19.2727	Neutral	ybcL	inactive polymorphonuclear leukocyte migration suppressor; DLP12 prophage; UPF0098 family secreted protein	WP_001306955.1	Not Essential
550	b0546	chromosome	Protein_Coding	protein_coding	73	23.3	15.0588	Regional	ybcM	DLP12 prophage; putative DNA-binding transcriptional regulator	WP_000881075.1	Not Essential
551	b4588	chromosome	Protein_Coding	protein_coding	2	50	2	Neutral	ylcH	uncharacterized protein, DLP12 prophage	WP_001303586.1	Not Essential
552	b0547	chromosome	Protein_Coding	protein_coding	21	57.1	38.9167	Neutral	ybcN	DLP12 prophage; uncharacterized protein	WP_001054340.1	Not Essential
553	b0548	chromosome	Protein_Coding	protein_coding	10	70	12.8571	Neutral	ninE	DLP12 prophage; conserved protein	WP_000224915.1	Not Essential
554	b0549	chromosome	Protein_Coding	protein_coding	11	72.7	13.875	Neutral	ybcO	DLP12 prophage; uncharacterized protein	WP_000774486.1	Not Essential
555	b0550	chromosome	Protein_Coding	protein_coding	16	43.8	14.4286	Neutral	rusA	DLP12 prophage; endonuclease RUS	WP_001099712.1	Not Essential
556	b4509	chromosome	Protein_Coding	protein_coding	8	75	13.1667	Neutral	ylcG	uncharacterized protein, DLP12 prophage	WP_000971055.1	Not Essential
557	b0551	chromosome	Protein_Coding	protein_coding	28	53.6	10.1333	Neutral	quuD	DLP12 prophage; putative antitermination protein	WP_001204791.1	Not Essential
558	b0553	chromosome	Pseudogene	pseudogene	11	72.7	22	Neutral	nmpC	---	---	Not Essential
559	b0552	chromosome	Protein_Coding	protein_coding	20	90	26.8889	Neutral	insH1	IS5 transposase and trans-activator	WP_010723085.1	Not Essential
560	b0554	chromosome	Protein_Coding	protein_coding	16	56.2	32	Neutral	essD	DLP12 prophage; putative phage lysis protein	WP_000839596.1	Not Essential
561	b0555	chromosome	Protein_Coding	protein_coding	28	71.4	54.75	Neutral	rrrD	DLP12 prophage; putative lysozyme	WP_001135281.1	Not Essential
562	b0556	chromosome	Protein_Coding	protein_coding	13	76.9	21.9	Neutral	rzpD	DLP12 prophage; putative murein endopeptidase	WP_000092242.1	Not Essential
563	b0557	chromosome	Protein_Coding	protein_coding	16	25	9.25	Neutral	borD	DLP12 prophage; putative lipoprotein	WP_000738500.1	Not Essential
564	b0558	chromosome	Protein_Coding	protein_coding	39	25.6	10.4	Underrepresented	ybcV	DLP12 prophage; uncharacterized protein	WP_000079503.1	Not Essential
565	b0559	chromosome	Protein_Coding	protein_coding	15	73.3	62.6364	Neutral	ybcW	DLP12 prophage; uncharacterized protein	WP_001031427.1	Not Essential
566	b4589	chromosome	Protein_Coding	protein_coding	7	57.1	28.5	Neutral	ylcI	DUF3950 family protein, DLP12 prophage	WP_001421937.1	Not Essential
567	b0560	chromosome	Protein_Coding	protein_coding	13	76.9	29.5	Neutral	nohD	DLP12 prophage; DNA packaging protein	WP_000453566.1	Not Essential
568	b4634	chromosome	Pseudogene	pseudogene	15	80	30.4167	Neutral	aaaD	---	---	Not Essential
569	b0561	chromosome	Pseudogene	pseudogene	17	52.9	35	Neutral	tfaD	---	---	Not Essential
570	b0562	chromosome	Pseudogene	pseudogene	43	55.8	18.4167	Neutral	ybcY	---	---	Not Essential
571	b0563	chromosome	Pseudogene	pseudogene	10	60	19.3333	Regional	tfaX	---	---	Not Essential
572	b0564	chromosome	Protein_Coding	protein_coding	71	15.5	10.9091	Underrepresented	appY	global transcriptional activator; DLP12 prophage	WP_000386784.1	Not Essential
573	b0565	chromosome	Protein_Coding	protein_coding	64	32.8	17.5238	Regional	ompT	DLP12 prophage; outer membrane protease VII; outer membrane protein 3b	WP_001201845.1	Not Essential
574	b4635	chromosome	RNA	tRNA_pseudogene	1	0	0	Neutral	pauD	tRNA-OTHER	---	Not Essential
575	b0566	chromosome	Protein_Coding	protein_coding	51	60.8	35.2258	Neutral	envY	porin thermoregulatory transcriptional activator	WP_001177471.1	Not Essential
576	b0567	chromosome	Protein_Coding	protein_coding	41	53.7	27.3182	Neutral	ybcH	PRK09936 family protein	WP_001224604.1	Not Essential
577	b0568	chromosome	Protein_Coding	protein_coding	122	60.7	38.1216	Neutral	nfrA	bacteriophage N4 receptor, outer membrane subunit	WP_000662357.1	Not Essential
578	b0569	chromosome	Protein_Coding	protein_coding	82	64.6	29.6604	Neutral	nfrB	bacteriophage N4 receptor, inner membrane subunit	WP_000383932.1	Not Essential
579	b0570	chromosome	Protein_Coding	protein_coding	65	67.7	30.7727	Neutral	cusS	copper-sensing histidine kinase in two-component regulatory system with CusR	WP_000253839.1	Not Essential
580	b0571	chromosome	Protein_Coding	protein_coding	24	58.3	60.8571	Neutral	cusR	response regulator in two-component regulatory system with CusS	WP_000770953.1	Not Essential
581	b0572	chromosome	Protein_Coding	protein_coding	69	47.8	15.3636	Neutral	cusC	copper/silver efflux system, outer membrane component	WP_000074234.1	Not Essential
582	b0573	chromosome	Protein_Coding	protein_coding	16	50	15.875	Neutral	cusF	periplasmic copper- and silver-binding protein	WP_000709870.1	Not Essential
583	b0574	chromosome	Protein_Coding	protein_coding	44	43.2	31.6842	Neutral	cusB	copper/silver efflux system, membrane fusion protein	WP_000717157.1	Not Essential
584	b0575	chromosome	Protein_Coding	protein_coding	113	71.7	43.2963	Neutral	cusA	copper/silver efflux system, membrane component	WP_000573945.1	Not Essential
585	b0576	chromosome	Protein_Coding	protein_coding	57	61.4	36.9714	Neutral	pheP	phenylalanine transporter	WP_000786319.1	Not Essential
586	b0577	chromosome	Protein_Coding	protein_coding	69	66.7	23.8261	Neutral	ybdG	mechanosensitive channel protein, miniconductance	WP_001153148.1	Not Essential
587	b0578	chromosome	Protein_Coding	protein_coding	24	45.8	45.7273	Neutral	nfsB	dihydropteridine reductase, NAD(P)H-dependent, oxygen-insensitive	WP_000351487.1	Not Essential
588	b0579	chromosome	Protein_Coding	protein_coding	17	70.6	11.5	Neutral	ybdF	DUF419 family protein	WP_000360951.1	Not Essential
589	b0580	chromosome	Protein_Coding	protein_coding	10	50	4.8	Neutral	ybdJ	DUF1158 family putative inner membrane protein	WP_000682509.1	Not Essential
590	b0581	chromosome	Protein_Coding	protein_coding	47	61.7	52.0345	Neutral	ybdK	weak gamma-glutamyl:cysteine ligase	WP_001130654.1	Not Essential
591	b4700	chromosome	RNA	antisense_RNA	2	100	4.5	Neutral	sokE	sRNA at remnant mokE/hokE locus	---	Not Essential
592	b4415	chromosome	Protein_Coding	protein_coding	10	80	67.75	Neutral	hokE	toxic polypeptide, small	WP_000956455.1	Not Essential
593	b0582	chromosome	Protein_Coding	protein_coding	46	89.1	28.878	Neutral	insL1	IS186 transposase	WP_001300563.1	Not Essential
594	b0583	chromosome	Protein_Coding	protein_coding	36	77.8	30.0357	Neutral	entD	phosphopantetheinyltransferase component of enterobactin synthase multienzyme complex	WP_001749708.1	Not Essential
595	b0584	chromosome	Protein_Coding	protein_coding	104	66.3	33.3333	Neutral	fepA	ferrienterobactin outer membrane transporter	WP_001034943.1	Not Essential
596	b0585	chromosome	Protein_Coding	protein_coding	39	17.9	21.7143	Underrepresented	fes	enterobactin/ferrienterobactin esterase	WP_000125843.1	Not Essential
597	b4511	chromosome	Protein_Coding	protein_coding	6	50	44.3333	Neutral	ybdZ	stimulator of EntF adenylation activity, MbtH-like	WP_000885798.1	Not Essential
598	b0586	chromosome	Protein_Coding	protein_coding	146	56.2	34.2195	Neutral	entF	enterobactin synthase multienzyme complex component, ATP-dependent	WP_000077805.1	Not Essential
599	b0587	chromosome	Protein_Coding	protein_coding	53	30.2	16.75	Regional	fepE	regulator of length of O-antigen component of lipopolysaccharide chains	WP_000096692.1	Not Essential
600	b0588	chromosome	Protein_Coding	protein_coding	30	6.7	1.5	Underrepresented	fepC	ferrienterobactin ABC transporter ATPase	WP_000140647.1	Not Essential
601	b0589	chromosome	Protein_Coding	protein_coding	38	15.8	24.5	Underrepresented	fepG	iron-enterobactin ABC transporter permease	WP_000640988.1	Not Essential
602	b0590	chromosome	Protein_Coding	protein_coding	31	22.6	5.14286	Underrepresented	fepD	ferrienterobactin ABC transporter permease	WP_000016947.1	Not Essential
603	b0591	chromosome	Protein_Coding	protein_coding	36	80.6	28.4138	Neutral	entS	enterobactin exporter, iron-regulated	WP_001041786.1	Not Essential
604	b0592	chromosome	Protein_Coding	protein_coding	38	13.2	18.4	Underrepresented	fepB	ferrienterobactin ABC transporter periplasmic binding protein	WP_001234311.1	Not Essential
605	b0593	chromosome	Protein_Coding	protein_coding	26	69.2	49.6667	Neutral	entC	isochorismate synthase 1	WP_000381303.1	Not Essential
606	b0594	chromosome	Protein_Coding	protein_coding	54	61.1	24.9697	Neutral	entE	2,3-dihydroxybenzoate-AMP ligase component of enterobactin synthase multienzyme complex	WP_000026812.1	Not Essential
607	b0595	chromosome	Protein_Coding	protein_coding	32	62.5	15.85	Neutral	entB	isochorismatase	WP_001007138.1	Not Essential
608	b0596	chromosome	Protein_Coding	protein_coding	24	62.5	13.4	Neutral	entA	2,3-dihydro-2,3-dihydroxybenzoate dehydrogenase	WP_000347651.1	Not Essential
609	b0597	chromosome	Protein_Coding	protein_coding	13	84.6	53.0909	Neutral	entH	enterobactin synthesis proofreading thioesterase	WP_000637953.1	Not Essential
610	b0598	chromosome	Protein_Coding	protein_coding	74	73	43.6852	Neutral	cstA	carbon starvation protein involved in peptide utilization; APC peptide transporter family protein	WP_001043156.1	Not Essential
611	b4512	chromosome	Protein_Coding	protein_coding	10	60	34.6667	Neutral	ybdD	DUF466 family protein	WP_000460431.1	Not Essential
612	b0599	chromosome	Protein_Coding	protein_coding	31	64.5	67.45	Neutral	ybdH	putative oxidoreductase	WP_001120441.1	Not Essential
613	b0600	chromosome	Protein_Coding	protein_coding	44	70.5	36.5806	Neutral	ybdL	methionine aminotransferase, PLP-dependent	WP_000183907.1	Not Essential
614	b0601	chromosome	Protein_Coding	protein_coding	30	66.7	36.4	Neutral	ybdM	Spo0J family protein, ParB-like nuclease domain	WP_000502945.1	Not Essential
615	b0602	chromosome	Protein_Coding	protein_coding	61	62.3	22.0263	Neutral	ybdN	PAPS reductase-like domain protein	WP_000029814.1	Not Essential
616	b0603	chromosome	Protein_Coding	protein_coding	70	18.6	9.30769	Regional	ybdO	putative DNA-binding transcriptional regulator	WP_000002474.1	Not Essential
617	b0604	chromosome	Protein_Coding	protein_coding	40	67.5	22.5926	Regional	dsbG	thiol:disulfide interchange protein, periplasmic	WP_000913829.1	Not Essential
618	b0605	chromosome	Protein_Coding	protein_coding	25	64	17	Neutral	ahpC	alkyl hydroperoxide reductase, C22 subunit	WP_000052796.1	Not Essential
619	b0606	chromosome	Protein_Coding	protein_coding	46	56.5	26.0769	Neutral	ahpF	alkyl hydroperoxide reductase, F52a subunit, FAD/NAD(P)-binding	WP_000887629.1	Not Essential
620	b0607	chromosome	Protein_Coding	protein_coding	16	93.8	46.4	Neutral	uspG	universal stress protein UP12	WP_000278509.1	Not Essential
621	b0608	chromosome	Protein_Coding	protein_coding	55	52.7	32.6207	Neutral	ybdR	putative Zn-dependent NAD(P)-binding oxidoreductase	WP_000646173.1	Not Essential
622	b0610	chromosome	Protein_Coding	protein_coding	15	60	37	Neutral	rnk	regulator of nucleoside diphosphate kinase	WP_000089731.1	Not Essential
623	b0611	chromosome	Protein_Coding	protein_coding	30	66.7	39.1	Neutral	rna	ribonuclease I	WP_000643397.1	Not Essential
624	b0612	chromosome	Protein_Coding	protein_coding	71	69	37.5102	Neutral	citT	citrate/succinate antiporter; citrate carrier	WP_000050323.1	Not Essential
625	b0613	chromosome	Protein_Coding	protein_coding	35	62.9	58.5	Neutral	citG	2-(5''-triphosphoribosyl)-3'-dephosphocoenzyme-A synthase	WP_000062457.1	Not Essential
626	b0614	chromosome	Protein_Coding	protein_coding	10	60	36.5	Neutral	citX	apo-citrate lyase phosphoribosyl-dephospho-CoA transferase	WP_000550422.1	Not Essential
627	b0615	chromosome	Protein_Coding	protein_coding	46	54.3	50.92	Neutral	citF	citrate lyase, citrate-ACP transferase (alpha) subunit	WP_000192242.1	Not Essential
628	b0616	chromosome	Protein_Coding	protein_coding	22	45.5	45.2	Neutral	citE	citrate lyase, citryl-ACP lyase (beta) subunit	WP_000622357.1	Not Essential
629	b0617	chromosome	Protein_Coding	protein_coding	9	44.4	11.25	Neutral	citD	citrate lyase, acyl carrier (gamma) subunit	WP_000700703.1	Not Essential
630	b0618	chromosome	Protein_Coding	protein_coding	47	46.8	39.8636	Regional	citC	citrate lyase ligase; [citrate [pro-3S]-lyase] ligase	WP_000467705.1	Not Essential
631	b0619	chromosome	Protein_Coding	protein_coding	69	52.2	33.3889	Neutral	citA	sensory histidine kinase in two-component regulatory system with CitB	WP_000939767.1	Not Essential
632	b0620	chromosome	Protein_Coding	protein_coding	36	75	31.7407	Neutral	citB	response regulator in two-component regulatory system with CitA	WP_000126500.1	Not Essential
633	b0621	chromosome	Protein_Coding	protein_coding	65	67.7	27.4773	Neutral	dcuC	anaerobic C4-dicarboxylate transport	WP_000955063.1	Not Essential
634	b0622	chromosome	Protein_Coding	protein_coding	30	43.3	24	Regional	pagP	phospholipid:lipid A palmitoyltransferase	WP_001103094.1	Not Essential
635	b0623	chromosome	Protein_Coding	protein_coding	13	61.5	11	Neutral	cspE	constitutive cold shock family transcription antitermination protein; negative regulator of cspA transcription; RNA melting protein; ssDNA-binding protein	WP_000034825.1	Not Essential
636	b0624	chromosome	Protein_Coding	protein_coding	15	66.7	13.3	Neutral	flc	fluoride efflux channel, dual topology membrane protein	WP_000939747.1	Not Essential
637	b4581	chromosome	Pseudogene	pseudogene	25	64	33.5625	Neutral	ybeM	---	---	Not Essential
638	b0627	chromosome	Protein_Coding	protein_coding	9	100	48.6667	Neutral	tatE	TatABCE protein translocation system subunit	WP_000503931.1	Not Essential
639	b0628	chromosome	Protein_Coding	protein_coding	37	5.4	9.5	Underrepresented	lipA	lipoate synthase	WP_000042632.1	Not Essential
640	b0629	chromosome	Protein_Coding	protein_coding	57	52.6	27.1667	Regional	ybeF	LysR family putative transcriptional regulator	WP_000378026.1	Not Essential
641	b0630	chromosome	Protein_Coding	protein_coding	41	0	0	Underrepresented	lipB	octanoyltransferase; octanoyl-[ACP]:protein N-octanoyltransferase	WP_000284027.1	Not Essential
642	b0631	chromosome	Protein_Coding	protein_coding	17	5.9	11	Underrepresented	ybeD	UPF0250 family protein	WP_000850550.1	Not Essential
643	b0632	chromosome	Protein_Coding	protein_coding	56	53.6	27.1333	Neutral	dacA	D-alanyl-D-alanine carboxypeptidase (penicillin-binding protein 5)	WP_001092082.1	Not Essential
644	b0633	chromosome	Protein_Coding	protein_coding	45	64.4	41.4138	Neutral	rlpA	septal ring protein, suppressor of prc, minor lipoprotein	WP_001231430.1	Not Essential
645	b0634	chromosome	Protein_Coding	protein_coding	53	1.9	78	Underrepresented	mrdB	cell wall shape-determining protein	WP_000131719.1	Essential
646	b0635	chromosome	Protein_Coding	protein_coding	100	2	59.5	Underrepresented	mrdA	penicillin-binding protein 2, transpeptidase involved in peptidoglycan synthesis	WP_000776191.1	Essential
647	b0636	chromosome	Protein_Coding	protein_coding	13	7.7	35	Underrepresented	rlmH	23S rRNA m(3)Psi1915 pseudouridine methyltransferase, SAM-dependent	WP_000776104.1	Not Essential
648	b0637	chromosome	Protein_Coding	protein_coding	10	60	71.3333	Neutral	rsfS	ribosomal silencing factor	WP_001161664.1	Not Essential
649	b0638	chromosome	Protein_Coding	protein_coding	23	65.2	30.5333	Neutral	cobC	putative alpha-ribazole-5'-P phosphatase	WP_001241872.1	Not Essential
650	b0639	chromosome	Protein_Coding	protein_coding	27	7.4	25	Underrepresented	nadD	nicotinic acid mononucleotide adenylyltransferase, NAD(P)-dependent	WP_000838889.1	Essential
651	b0640	chromosome	Protein_Coding	protein_coding	37	8.1	15	Underrepresented	holA	DNA polymerase III, delta subunit	WP_000620535.1	Essential
652	b0641	chromosome	Protein_Coding	protein_coding	28	0	0	Underrepresented	lptE	LPS assembly OM complex LptDE, lipoprotein component	WP_001269673.1	Essential
653	b0642	chromosome	Protein_Coding	protein_coding	114	0	0	Underrepresented	leuS	leucyl-tRNA synthetase	WP_001340834.1	Essential
654	b0643	chromosome	Protein_Coding	protein_coding	14	71.4	8.8	Neutral	ybeL	DUF1451 family protein	WP_001044880.1	Not Essential
655	b0644	chromosome	Protein_Coding	protein_coding	56	58.9	38.6364	Regional	ybeQ	Sel1 family TPR-like repeat protein	WP_000578178.1	Not Essential
656	b0645	chromosome	Protein_Coding	protein_coding	44	45.5	17.35	Neutral	ybeR	uncharacterized protein	WP_000367023.1	Not Essential
657	b0646	chromosome	Protein_Coding	protein_coding	75	52	24.2051	Neutral	djlB	putative HscC co-chaperone, uncharacterized J domain-containing protein	WP_000786572.1	Not Essential
658	b0647	chromosome	Protein_Coding	protein_coding	40	42.5	16.7059	Regional	ybeT	Sel1 family TPR-like repeat protein	WP_001035674.1	Not Essential
659	b0648	chromosome	Protein_Coding	protein_coding	40	52.5	28.0952	Regional	ybeU	DUF1266 family protein	WP_001030934.1	Not Essential
660	b0649	chromosome	Protein_Coding	protein_coding	63	61.9	31.7179	Neutral	djlC	J domain-containing HscC co-chaperone; Hsc56	WP_001300403.1	Not Essential
661	b0650	chromosome	Protein_Coding	protein_coding	81	46.9	24.7105	Neutral	hscC	Hsp70 family chaperone Hsc62; RpoD-binding transcription inhibitor	WP_000367875.1	Not Essential
662	b0651	chromosome	Protein_Coding	protein_coding	44	59.1	21.3077	Neutral	rihA	ribonucleoside hydrolase 1	WP_001207520.1	Not Essential
663	b0652	chromosome	Protein_Coding	protein_coding	17	47.1	20.375	Neutral	gltL	glutamate/aspartate ABC transporter ATPase	WP_000631384.1	Not Essential
664	b0653	chromosome	Protein_Coding	protein_coding	32	56.2	30.1111	Neutral	gltK	glutamate/aspartate ABC transporter permease	WP_000272824.1	Not Essential
665	b0654	chromosome	Protein_Coding	protein_coding	35	57.1	39.5	Neutral	gltJ	glutamate/aspartate ABC transporter permease	WP_000020941.1	Not Essential
666	b0655	chromosome	Protein_Coding	protein_coding	24	70.8	21.0588	Neutral	gltI	glutamate/aspartate periplasmic binding protein	WP_001177086.1	Not Essential
667	b0656	chromosome	Protein_Coding	protein_coding	20	95	24.0526	Neutral	insH1	IS5 transposase and trans-activator	WP_010723085.1	Not Essential
668	b0657	chromosome	Protein_Coding	protein_coding	65	3.1	6.5	Underrepresented	lnt	apolipoprotein N-acyltransferase	WP_000853021.1	Essential
669	b0658	chromosome	Protein_Coding	protein_coding	25	64	23.5625	Neutral	ybeX	putative ion transport	WP_001278605.1	Not Essential
670	b0659	chromosome	Protein_Coding	protein_coding	16	12.5	7	Underrepresented	ybeY	ssRNA-specific endoribonuclease; 16S rRNA 3' end maturation and quality control co-endoribonuclease working with RNase R; rRNA transcription antitermination factor	WP_000084469.1	Not Essential
671	b0660	chromosome	Protein_Coding	protein_coding	41	53.7	48.3182	Neutral	ybeZ	heat shock protein, putative NTPase; PhoH-like protein	WP_001018040.1	Not Essential
672	b0661	chromosome	Protein_Coding	protein_coding	53	69.8	27.027	Neutral	miaB	tRNA-i(6)A37 methylthiotransferase	WP_000162740.1	Not Essential
673	b0662	chromosome	Protein_Coding	protein_coding	41	4.9	76	Underrepresented	ubiF	2-octaprenyl-3-methyl-6-methoxy-1,4-benzoquinol oxygenase	WP_000184541.1	Not Essential
674	b0664	chromosome	RNA	tRNA	3	0	0	Neutral	glnX	tRNA-Gln	---	Not Essential
675	b0665	chromosome	RNA	tRNA	3	0	0	Neutral	glnV	tRNA-Gln	---	Not Essential
676	b0666	chromosome	RNA	tRNA	5	0	0	Underrepresented	metU	tRNA-Met	---	Not Essential
677	b0668	chromosome	RNA	tRNA	4	0	0	Underrepresented	glnW	tRNA-Gln	---	Not Essential
678	b0670	chromosome	RNA	tRNA	4	0	0	Underrepresented	glnU	tRNA-Gln	---	Not Essential
679	b0672	chromosome	RNA	tRNA	2	0	0	Underrepresented	leuW	tRNA-Leu	---	Essential
680	b0673	chromosome	RNA	tRNA	5	0	0	Underrepresented	metT	tRNA-Met	---	Not Essential
681	b0674	chromosome	Protein_Coding	protein_coding	62	74.2	66.5	Neutral	asnB	asparagine synthetase B	WP_000337077.1	Not Essential
682	b0675	chromosome	Protein_Coding	protein_coding	31	58.1	24.0556	Neutral	umpH	UMP phosphatase	WP_000153129.1	Not Essential
683	b0676	chromosome	Protein_Coding	protein_coding	50	60	19.2	Neutral	nagC	N-acetylglucosamine-inducible nag divergent operon transcriptional repressor	WP_000187594.1	Not Essential
684	b0677	chromosome	Protein_Coding	protein_coding	52	42.3	16.1818	Regional	nagA	N-acetylglucosamine-6-phosphate deacetylase	WP_000271153.1	Not Essential
685	b0678	chromosome	Protein_Coding	protein_coding	37	45.9	20.7059	Neutral	nagB	glucosamine-6-phosphate deaminase	WP_001237072.1	Not Essential
686	b0679	chromosome	Protein_Coding	protein_coding	77	59.7	29.087	Neutral	nagE	N-acetyl glucosamine specific PTS enzyme IIC, IIB, and IIA components	WP_001023093.1	Not Essential
687	b0680	chromosome	Protein_Coding	protein_coding	73	1.4	3	Underrepresented	glnS	glutamyl-tRNA synthetase	WP_001287154.1	Essential
688	b0681	chromosome	Protein_Coding	protein_coding	75	65.3	33.2041	Neutral	chiP	chitoporin, uptake of chitosugars	WP_001258819.1	Not Essential
689	b0682	chromosome	Protein_Coding	protein_coding	13	84.6	24.9091	Neutral	chiQ	chitosugar-induced verified lipoprotein	WP_000733579.1	Not Essential
690	b0683	chromosome	Protein_Coding	protein_coding	21	4.8	53	Underrepresented	fur	ferric iron uptake regulon transcriptional repressor; autorepressor	WP_000131702.1	Not Essential
691	b4637	chromosome	Protein_Coding	protein_coding	5	0	0	Underrepresented	uof	ryhB-regulated fur leader peptide	WP_001406816.1	Not Essential
692	b0684	chromosome	Protein_Coding	protein_coding	14	0	0	Underrepresented	fldA	flavodoxin 1	WP_001018618.1	Essential
693	b0685	chromosome	Protein_Coding	protein_coding	14	57.1	37.875	Neutral	ybfE	LexA-regulated protein, CopB family	WP_001300829.1	Not Essential
694	b0686	chromosome	Protein_Coding	protein_coding	37	48.6	28	Neutral	ybfF	acyl-CoA esterase	WP_000773288.1	Not Essential
695	b0687	chromosome	Protein_Coding	protein_coding	21	19	23	Underrepresented	seqA	negative modulator of initiation of replication	WP_000848387.1	Not Essential
696	b0688	chromosome	Protein_Coding	protein_coding	49	0	0	Underrepresented	pgm	phosphoglucomutase	WP_001297249.1	Not Essential
697	b0689	chromosome	Protein_Coding	protein_coding	31	71	18.2273	Neutral	ybfP	lipoprotein	WP_000856353.1	Not Essential
698	b0691	chromosome	Pseudogene	pseudogene	41	39	14.0625	Neutral	ybfG	---	---	Not Essential
699	b4636	chromosome	Pseudogene	pseudogene	11	36.4	25.75	Neutral	ybfI	---	---	Not Essential
700	b0692	chromosome	Protein_Coding	protein_coding	67	59.7	36.25	Neutral	potE	putrescine/proton symporter: putrescine/ornithine antiporter	WP_000075845.1	Not Essential
701	b0693	chromosome	Protein_Coding	protein_coding	98	56.1	48.9273	Regional	speF	ornithine decarboxylase isozyme, inducible	WP_000040195.1	Not Essential
702	b4590	chromosome	Protein_Coding	protein_coding	21	23.8	14.4	Underrepresented	ybfK	uncharacterized protein	WP_001171592.1	Not Essential
703	b0694	chromosome	Protein_Coding	protein_coding	20	60	23.75	Neutral	kdpE	response regulator in two-component regulatory system with KdpD	WP_000186076.1	Not Essential
704	b0695	chromosome	Protein_Coding	protein_coding	88	56.8	34.76	Neutral	kdpD	fused sensory histidine kinase in two-component regulatory system with KdpE: signal sensing protein	WP_001310640.1	Not Essential
705	b0696	chromosome	Protein_Coding	protein_coding	27	59.3	18	Neutral	kdpC	potassium translocating ATPase, subunit C	WP_001300431.1	Not Essential
706	b0697	chromosome	Protein_Coding	protein_coding	67	50.7	20.4118	Neutral	kdpB	potassium translocating ATPase, subunit B	WP_000087939.1	Not Essential
707	b0698	chromosome	Protein_Coding	protein_coding	53	62.3	28.2121	Neutral	kdpA	potassium translocating ATPase, subunit A	WP_000741129.1	Not Essential
708	b4513	chromosome	Protein_Coding	protein_coding	6	83.3	26.2	Neutral	kdpF	potassium ion accessory transporter subunit	WP_001272653.1	Not Essential
709	b0699	chromosome	Protein_Coding	protein_coding	10	60	36.8333	Neutral	ybfA	DUF2517 family protein	WP_000424924.1	Not Essential
710	b0700	chromosome	Protein_Coding	protein_coding	161	68.9	34.3514	Neutral	rhsC	Rhs protein with putative toxin domain; putative neighboring cell growth inhibitor	WP_000015200.1	Not Essential
711	b0702	chromosome	Protein_Coding	protein_coding	45	6.7	3	Underrepresented	ybfB	putative membrane protein	WP_000873944.1	Not Essential
712	b0703	chromosome	Pseudogene	pseudogene	67	61.2	23.3659	Regional	rhsO	---	---	Not Essential
713	b0704	chromosome	Protein_Coding	protein_coding	44	9.1	1.5	Underrepresented	ybfC	putative secreted protein	WP_000832338.1	Not Essential
714	b4514	chromosome	Pseudogene	pseudogene	16	6.2	6	Underrepresented	ybfQ	---	---	Not Essential
715	b0705	chromosome	Pseudogene	pseudogene	65	24.6	9	Underrepresented	ybfL	---	---	Not Essential
716	b0706	chromosome	Protein_Coding	protein_coding	45	28.9	6.92308	Regional	ybfD	H repeat-associated putative transposase	WP_000420862.1	Not Essential
717	b0707	chromosome	Protein_Coding	protein_coding	25	68	34.8824	Neutral	ybgA	DUF1722 family protein	WP_001053305.1	Not Essential
718	b0708	chromosome	Protein_Coding	protein_coding	60	63.3	36.0263	Neutral	phr	deoxyribodipyrimidine photolyase, FAD-binding	WP_000207142.1	Not Essential
719	b0709	chromosome	Protein_Coding	protein_coding	78	67.9	37.6981	Neutral	dtpD	dipeptide and tripeptide permease D	WP_001032689.1	Not Essential
720	b0710	chromosome	Protein_Coding	protein_coding	25	44	32.4545	Neutral	ybgI	NIF3 family metal-binding protein	WP_000798871.1	Not Essential
721	b0711	chromosome	Protein_Coding	protein_coding	21	57.1	35.3333	Neutral	ybgJ	putative allophanate hydrolase, subunit 1	WP_001188343.1	Not Essential
722	b0712	chromosome	Protein_Coding	protein_coding	36	63.9	46.2174	Neutral	ybgK	putative allophanate hydrolase, subunit 2	WP_000912724.1	Not Essential
723	b0713	chromosome	Protein_Coding	protein_coding	15	66.7	33.3	Neutral	ybgL	UPF0271 family protein	WP_000687112.1	Not Essential
724	b0714	chromosome	Protein_Coding	protein_coding	30	53.3	30.625	Neutral	nei	endonuclease VIII and 5-formyluracil/5-hydroxymethyluracil DNA glycosylase	WP_001113989.1	Not Essential
725	b0715	chromosome	Protein_Coding	protein_coding	47	68.1	38	Neutral	abrB	regulator of aidB expression; inner membrane protein	WP_001336221.1	Not Essential
726	b0716	chromosome	Protein_Coding	protein_coding	67	70.1	19.7021	Neutral	ybgO	putative fimbrial protein	WP_001272410.1	Not Essential
727	b0717	chromosome	Protein_Coding	protein_coding	35	68.6	34.875	Neutral	ybgP	putative periplasmic pilin chaperone	WP_000142799.1	Not Essential
728	b0718	chromosome	Protein_Coding	protein_coding	110	61.8	36.2059	Neutral	ybgQ	putative outer membrane protein	WP_001350492.1	Not Essential
729	b0719	chromosome	Protein_Coding	protein_coding	30	43.3	11.1538	Regional	ybgD	putative fimbrial-like adhesin protein	WP_000472412.1	Not Essential
730	b0720	chromosome	Protein_Coding	protein_coding	55	0	0	Underrepresented	gltA	citrate synthase	WP_000785834.1	Not Essential
731	b0721	chromosome	Protein_Coding	protein_coding	16	6.2	52	Underrepresented	sdhC	succinate dehydrogenase, membrane subunit, binds cytochrome b556	WP_001308496.1	Not Essential
732	b0722	chromosome	Protein_Coding	protein_coding	15	6.7	7	Underrepresented	sdhD	succinate dehydrogenase, membrane subunit, binds cytochrome b556	WP_000254365.1	Not Essential
733	b0723	chromosome	Protein_Coding	protein_coding	56	12.5	13.4286	Underrepresented	sdhA	succinate dehydrogenase, flavoprotein subunit	WP_000775540.1	Not Essential
734	b0724	chromosome	Protein_Coding	protein_coding	30	20	9.33333	Underrepresented	sdhB	succinate dehydrogenase, FeS subunit	WP_001235254.1	Not Essential
735	b0726	chromosome	Protein_Coding	protein_coding	84	1.2	8	Underrepresented	sucA	2-oxoglutarate decarboxylase, thiamine triphosphate-binding	WP_001181473.1	Not Essential
736	b0727	chromosome	Protein_Coding	protein_coding	35	2.9	2	Underrepresented	sucB	dihydrolipoyltranssuccinase	WP_000099823.1	Not Essential
737	b0728	chromosome	Protein_Coding	protein_coding	40	45	18.7778	Regional	sucC	succinyl-CoA synthetase, beta subunit	WP_001048602.1	Not Essential
738	b0729	chromosome	Protein_Coding	protein_coding	34	23.5	26.625	Regional	sucD	succinyl-CoA synthetase, NAD(P)-binding, alpha subunit	WP_000025458.1	Not Essential
739	b0730	chromosome	Protein_Coding	protein_coding	33	51.5	8.70588	Neutral	mngR	transcriptional repressor for the mannosyl-D-glycerate catabolic operon	WP_000509902.1	Not Essential
740	b0731	chromosome	Protein_Coding	protein_coding	78	53.8	31.2381	Neutral	mngA	fused 2-O-a-mannosyl-D-glycerate specific PTS enzymes: IIA component/IIB component/IIC component	WP_000242633.1	Not Essential
741	b0732	chromosome	Protein_Coding	protein_coding	129	66.7	33.7791	Neutral	mngB	alpha-mannosidase	WP_000648976.1	Not Essential
742	b0733	chromosome	Protein_Coding	protein_coding	61	0	0	Underrepresented	cydA	cytochrome d terminal oxidase, subunit I	WP_000884361.1	Not Essential
743	b0734	chromosome	Protein_Coding	protein_coding	47	2.1	37	Underrepresented	cydB	cytochrome d terminal oxidase, subunit II	WP_000568275.1	Not Essential
744	b4515	chromosome	Protein_Coding	protein_coding	2	0	0	Neutral	cydX	cytochrome d (bd-I) ubiquinol oxidase subunit X	WP_000270282.1	Not Essential
745	b0735	chromosome	Protein_Coding	protein_coding	9	55.6	6.2	Neutral	ybgE	putative inner membrane protein in cydABX-ybgE operon	WP_000034602.1	Not Essential
746	b0736	chromosome	Protein_Coding	protein_coding	18	88.9	44.5	Neutral	ybgC	acyl-CoA thioester hydrolase	WP_001098384.1	Not Essential
747	b0737	chromosome	Protein_Coding	protein_coding	33	24.2	11.875	Underrepresented	tolQ	membrane spanning protein in TolA-TolQ-TolR complex	WP_000131314.1	Not Essential
748	b0738	chromosome	Protein_Coding	protein_coding	17	35.3	14.8333	Underrepresented	tolR	membrane spanning protein in TolA-TolQ-TolR complex	WP_000090097.1	Not Essential
749	b0739	chromosome	Protein_Coding	protein_coding	36	22.2	17.25	Underrepresented	tolA	membrane anchored protein in TolA-TolQ-TolR complex	WP_000030637.1	Not Essential
750	b0740	chromosome	Protein_Coding	protein_coding	54	18.5	9.4	Underrepresented	tolB	periplasmic protein	WP_001295307.1	Not Essential
751	b0741	chromosome	Protein_Coding	protein_coding	20	30	10.8333	Underrepresented	pal	peptidoglycan-associated outer membrane lipoprotein	WP_001295306.1	Not Essential
752	b0742	chromosome	Protein_Coding	protein_coding	36	69.4	33.44	Neutral	ybgF	periplasmic TolA-binding protein	WP_000097571.1	Not Essential
753	b0743	chromosome	RNA	tRNA	3	66.7	2.5	Neutral	lysT	tRNA-Lys	---	Not Essential
754	b0744	chromosome	RNA	tRNA	2	100	15	Neutral	valT	tRNA-Val	---	Not Essential
755	b0745	chromosome	RNA	tRNA	3	66.7	4	Neutral	lysW	tRNA-Lys	---	Not Essential
756	b0746	chromosome	RNA	tRNA	2	100	18.5	Neutral	valZ	tRNA-Val	---	Not Essential
757	b0747	chromosome	RNA	tRNA	3	33.3	5	Neutral	lysY	tRNA-Lys	---	Not Essential
758	b0748	chromosome	RNA	tRNA	3	100	2	Neutral	lysZ	tRNA-Lys	---	Not Essential
759	b0749	chromosome	RNA	tRNA	3	33.3	2	Neutral	lysQ	tRNA-Lys	---	Not Essential
760	b0750	chromosome	Protein_Coding	protein_coding	41	61	28.92	Neutral	nadA	quinolinate synthase, subunit A	WP_000115290.1	Not Essential
761	b0751	chromosome	Protein_Coding	protein_coding	32	81.2	42.5385	Neutral	pnuC	nicotinamide riboside transporter	WP_000345410.1	Not Essential
762	b0752	chromosome	Protein_Coding	protein_coding	35	68.6	59.0417	Neutral	zitB	zinc efflux system	WP_000951292.1	Not Essential
763	b0753	chromosome	Protein_Coding	protein_coding	18	61.1	28.7273	Neutral	ybgS	putative periplasmic protein	WP_000784351.1	Not Essential
764	b0754	chromosome	Protein_Coding	protein_coding	42	64.3	32.8889	Neutral	aroG	3-deoxy-D-arabino-heptulosonate-7-phosphate synthase, phenylalanine repressible	WP_001109196.1	Not Essential
765	b0755	chromosome	Protein_Coding	protein_coding	30	70	26.619	Neutral	gpmA	phosphoglyceromutase 1	WP_001295305.1	Not Essential
766	b0756	chromosome	Protein_Coding	protein_coding	35	65.7	23.6957	Neutral	galM	aldose 1-epimerase; type-1 mutarotase; galactose mutarotase	WP_000931389.1	Not Essential
767	b0757	chromosome	Protein_Coding	protein_coding	32	65.6	42.9048	Neutral	galK	galactokinase	WP_000053415.1	Not Essential
768	b0758	chromosome	Protein_Coding	protein_coding	33	60.6	16.9	Neutral	galT	galactose-1-phosphate uridylyltransferase	WP_000191497.1	Not Essential
769	b0759	chromosome	Protein_Coding	protein_coding	46	34.8	30.8125	Neutral	galE	UDP-galactose-4-epimerase	WP_001265438.1	Not Essential
770	b0760	chromosome	Protein_Coding	protein_coding	51	74.5	37.6053	Neutral	modF	molybdate ABC transporter ATPase	WP_000096869.1	Not Essential
771	b0761	chromosome	Protein_Coding	protein_coding	41	53.7	38.1818	Neutral	modE	transcriptional repressor for the molybdenum transport operon modABC	WP_001147439.1	Not Essential
772	b0762	chromosome	Protein_Coding	protein_coding	9	100	39.6667	Neutral	acrZ	AcrAB-TolC efflux pump accessory protein, membrane-associated	WP_000891515.1	Not Essential
773	b0763	chromosome	Protein_Coding	protein_coding	26	57.7	22.6	Neutral	modA	molybdate ABC transporter periplasmic binding protein; chlorate resistance protein	WP_000101984.1	Not Essential
774	b0764	chromosome	Protein_Coding	protein_coding	29	58.6	24.4118	Neutral	modB	molybdate ABC transporter permease; chlorate resistance protein	WP_000604034.1	Not Essential
775	b0765	chromosome	Protein_Coding	protein_coding	36	58.3	27.1429	Neutral	modC	molybdate ABC transporter ATPase; chlorate resistance protein	WP_000891692.1	Not Essential
776	b0766	chromosome	Protein_Coding	protein_coding	33	60.6	38.1	Neutral	ybhA	pyridoxal phosphate (PLP) phosphatase	WP_001300666.1	Not Essential
777	b0767	chromosome	Protein_Coding	protein_coding	38	10.5	22.75	Underrepresented	pgl	6-phosphogluconolactonase	WP_000815435.1	Not Essential
778	b0768	chromosome	Protein_Coding	protein_coding	58	34.5	21.55	Regional	ybhD	putative DNA-binding transcriptional regulator	WP_001350493.1	Not Essential
779	b0769	chromosome	Protein_Coding	protein_coding	62	35.5	41.5	Regional	ybhH	putative PrpF family isomerase	WP_000723652.1	Not Essential
780	b0770	chromosome	Protein_Coding	protein_coding	92	57.6	36.5094	Neutral	ybhI	putative DASS family tricarboxylate or dicarboxylate transporter	WP_001036475.1	Not Essential
781	b0771	chromosome	Protein_Coding	protein_coding	105	57.1	27.9167	Neutral	ybhJ	aconitase family protein	WP_000593938.1	Not Essential
782	b0772	chromosome	Protein_Coding	protein_coding	59	71.2	50.4048	Neutral	ybhC	acyl-CoA thioesterase, lipoprotein	WP_001091569.1	Not Essential
783	b0773	chromosome	Protein_Coding	protein_coding	26	61.5	41.0625	Neutral	ybhB	kinase inhibitor homolog, UPF0098 family	WP_000767389.1	Not Essential
784	b0774	chromosome	Protein_Coding	protein_coding	36	52.8	38.8421	Neutral	bioA	7,8-diaminopelargonic acid synthase, PLP-dependent	WP_001295303.1	Not Essential
785	b0775	chromosome	Protein_Coding	protein_coding	29	44.8	26.1538	Neutral	bioB	biotin synthase	WP_000951213.1	Not Essential
786	b0776	chromosome	Protein_Coding	protein_coding	39	64.1	32.32	Neutral	bioF	8-amino-7-oxononanoate synthase	WP_000118826.1	Not Essential
787	b0777	chromosome	Protein_Coding	protein_coding	25	60	44.1333	Neutral	bioC	malonyl-ACP O-methyltransferase, SAM-dependent	WP_000246761.1	Not Essential
788	b0778	chromosome	Protein_Coding	protein_coding	31	77.4	41.8333	Neutral	bioD	dethiobiotin synthetase	WP_000044843.1	Not Essential
789	b0779	chromosome	Protein_Coding	protein_coding	68	67.6	43.5217	Neutral	uvrB	exision nuclease of nucleotide excision repair, DNA damage recognition component	WP_000042533.1	Not Essential
790	b0780	chromosome	Protein_Coding	protein_coding	43	60.5	29.0769	Neutral	ybhK	putative CofD superfamily transferase	WP_001295302.1	Not Essential
791	b0781	chromosome	Protein_Coding	protein_coding	38	50	23.5789	Neutral	moaA	molybdopterin biosynthesis protein A	WP_001350494.1	Not Essential
792	b0782	chromosome	Protein_Coding	protein_coding	22	54.5	43.0833	Neutral	moaB	inactive molybdopterin adenylyltransferase	WP_000084639.1	Not Essential
793	b0783	chromosome	Protein_Coding	protein_coding	15	26.7	58.5	Neutral	moaC	molybdopterin biosynthesis, protein C	WP_000080885.1	Not Essential
794	b0784	chromosome	Protein_Coding	protein_coding	5	60	39.3333	Neutral	moaD	molybdopterin synthase, small subunit	WP_000598619.1	Not Essential
795	b0785	chromosome	Protein_Coding	protein_coding	14	50	11.7143	Neutral	moaE	molybdopterin synthase, large subunit	WP_000852296.1	Not Essential
796	b0786	chromosome	Protein_Coding	protein_coding	37	64.9	26.9583	Neutral	ybhL	putative acetate transporter; BAX Inhibitor-1 family inner membrane protein	WP_000373624.1	Not Essential
797	b0787	chromosome	Protein_Coding	protein_coding	62	45.2	20.8571	Neutral	ybhM	BAX Inhibitor-1 family inner membrane protein	WP_000446911.1	Not Essential
798	b0788	chromosome	Protein_Coding	protein_coding	55	76.4	39.9762	Neutral	ybhN	UPF0104 family inner membrane protein	WP_000045450.1	Not Essential
799	b0789	chromosome	Protein_Coding	protein_coding	46	67.4	37.4194	Neutral	clsB	cardiolipin synthase 2	WP_000650337.1	Not Essential
800	b0790	chromosome	Protein_Coding	protein_coding	27	51.9	42.8571	Neutral	ybhP	endo/exonuclease/phosphatase family protein	WP_001113348.1	Not Essential
801	b0791	chromosome	Protein_Coding	protein_coding	11	54.5	54.8333	Neutral	ybhQ	inner membrane protein	WP_000871982.1	Not Essential
802	b0792	chromosome	Protein_Coding	protein_coding	48	62.5	38.6667	Neutral	ybhR	putative ABC transporter permease	WP_000469031.1	Not Essential
803	b0793	chromosome	Protein_Coding	protein_coding	46	56.5	31.6923	Neutral	ybhS	putative ABC transporter permease	WP_000070131.1	Not Essential
804	b0794	chromosome	Protein_Coding	protein_coding	51	58.8	47.9333	Neutral	ybhF	putative ABC transporter ATPase	WP_000996107.1	Not Essential
805	b0795	chromosome	Protein_Coding	protein_coding	38	50	27.4211	Neutral	ybhG	putative membrane fusion protein (MFP) component of efflux pump, membrane anchor	WP_000976409.1	Not Essential
806	b0796	chromosome	Protein_Coding	protein_coding	19	52.6	42.3	Neutral	ybiH	DUF1956 domain-containing tetR family putative transcriptional regulator	WP_001296991.1	Not Essential
807	b0797	chromosome	Protein_Coding	protein_coding	42	42.9	24.9444	Neutral	rhlE	ATP-dependent RNA helicase	WP_000007101.1	Not Essential
808	b0798	chromosome	Protein_Coding	protein_coding	19	57.9	13	Neutral	ybiA	DUF1768 family protein	WP_001145126.1	Not Essential
809	b0799	chromosome	Protein_Coding	protein_coding	67	64.2	26.6977	Neutral	dinG	ATP-dependent DNA helicase	WP_001340191.1	Not Essential
810	b0800	chromosome	Protein_Coding	protein_coding	32	62.5	59.75	Neutral	ybiB	putative family 3 glycosyltransferase	WP_000386551.1	Not Essential
811	b0801	chromosome	Protein_Coding	protein_coding	37	64.9	37.7083	Neutral	ybiC	putative dehydrogenase	WP_000443530.1	Not Essential
812	b0802	chromosome	Protein_Coding	protein_coding	14	64.3	7.77778	Neutral	ybiJ	DUF1471 family putative periplasmic protein	WP_000849301.1	Not Essential
813	b0803	chromosome	Protein_Coding	protein_coding	12	50	20.5	Neutral	ybiI	DksA-type zinc finger protein	WP_000146343.1	Not Essential
814	b0804	chromosome	Protein_Coding	protein_coding	28	67.9	20.7368	Neutral	ybiX	Fe(II)-dependent oxygenase superfamily protein	WP_000990177.1	Not Essential
815	b0805	chromosome	Protein_Coding	protein_coding	103	69.9	32.5694	Neutral	fiu	catecholate siderophore receptor	WP_000430057.1	Not Essential
816	b0806	chromosome	Protein_Coding	protein_coding	13	76.9	23.4	Neutral	mcbA	colanic acid mucoidy stimulation protein	WP_000710619.1	Not Essential
817	b0807	chromosome	Protein_Coding	protein_coding	37	59.5	35.5	Neutral	rlmF	23S rRNA m(6)A1618 methyltransferase, SAM-dependent	WP_001295299.1	Not Essential
818	b0808	chromosome	Protein_Coding	protein_coding	89	53.9	37.6667	Neutral	ybiO	mechanosensitive channel protein, intermediate conductance	WP_001267253.1	Not Essential
819	b0809	chromosome	Protein_Coding	protein_coding	13	53.8	13.8571	Neutral	glnQ	glutamine transporter subunit	WP_000569083.1	Not Essential
820	b0810	chromosome	Protein_Coding	protein_coding	25	72	49.0556	Neutral	glnP	glutamine transporter subunit	WP_001159065.1	Not Essential
821	b0811	chromosome	Protein_Coding	protein_coding	35	45.7	30.0625	Neutral	glnH	glutamine transporter subunit	WP_000843866.1	Not Essential
822	b0812	chromosome	Protein_Coding	protein_coding	25	60	29.1333	Neutral	dps	Fe-binding and storage protein; stress-inducible DNA-binding protein	WP_000100800.1	Not Essential
823	b0813	chromosome	Protein_Coding	protein_coding	37	56.8	17.2381	Neutral	rhtA	threonine and homoserine efflux system	WP_001295297.1	Not Essential
824	b0814	chromosome	Protein_Coding	protein_coding	28	64.3	23.1111	Neutral	ompX	outer membrane protein X	WP_001295296.1	Not Essential
825	b0815	chromosome	Protein_Coding	protein_coding	86	53.5	32.1304	Neutral	opgE	OPG biosynthetic transmembrane phosphoethanolamine transferase	WP_001054678.1	Not Essential
826	b4705	chromosome	Protein_Coding	protein_coding	11	90.9	35.3	Neutral	mntS	Mn(2)-response protein, MntR-repressed	WP_001001761.1	Not Essential
827	b0817	chromosome	Protein_Coding	protein_coding	10	40	18.5	Neutral	mntR	Mn(2+)-responsive manganese regulon transcriptional regulator	WP_000091016.1	Not Essential
828	b0818	chromosome	Protein_Coding	protein_coding	53	71.7	18.5789	Neutral	ybiR	putative transporter	WP_000056457.1	Not Essential
829	b0819	chromosome	Protein_Coding	protein_coding	44	68.2	29.2	Neutral	ldtB	L,D-transpeptidase linking Lpp to murein	WP_001056384.1	Not Essential
830	b0820	chromosome	Protein_Coding	protein_coding	56	66.1	25.4324	Neutral	ybiT	ABC-F family putative regulatory ATPase	WP_000961458.1	Not Essential
831	b0821	chromosome	Protein_Coding	protein_coding	40	70	45.1786	Neutral	ybiU	DUF1479 family protein	WP_000168797.1	Not Essential
832	b0822	chromosome	Protein_Coding	protein_coding	43	62.8	23.8519	Neutral	ybiV	sugar phosphatase; fructose-1-P/ribose-5-P/glucose-6-P phosphatase	WP_000114272.1	Not Essential
833	b0823	chromosome	Protein_Coding	protein_coding	85	71.8	32.5246	Neutral	ybiW	putative pyruvate formate lyase	WP_000209309.1	Not Essential
834	b0824	chromosome	Protein_Coding	protein_coding	40	52.5	31	Neutral	ybiY	putative pyruvate formate lyase activating enzyme	WP_001295295.1	Not Essential
835	b0825	chromosome	Protein_Coding	protein_coding	30	63.3	30.0526	Neutral	fsaA	fructose-6-phosphate aldolase 1	WP_001336208.1	Not Essential
836	b0826	chromosome	Protein_Coding	protein_coding	23	52.2	44.4167	Neutral	moeB	molybdopterin synthase sulfurylase	WP_000829217.1	Not Essential
837	b0827	chromosome	Protein_Coding	protein_coding	49	57.1	10.6071	Neutral	moeA	molybdopterin molybdenumtransferase; molybdopterin biosynthesis protein	WP_000397340.1	Not Essential
838	b0828	chromosome	Protein_Coding	protein_coding	35	60	25.9524	Neutral	iaaA	Isoaspartyl peptidase	WP_000513781.1	Not Essential
839	b0829	chromosome	Protein_Coding	protein_coding	67	62.7	42.3333	Neutral	gsiA	glutathione ABC transporter ATPase	WP_001301279.1	Not Essential
840	b0830	chromosome	Protein_Coding	protein_coding	72	79.2	37.9298	Neutral	gsiB	glutathione ABC transporter periplasmic binding protein	WP_000090140.1	Not Essential
841	b0831	chromosome	Protein_Coding	protein_coding	46	65.2	30.5667	Neutral	gsiC	glutathione ABC transporter permease	WP_000936043.1	Not Essential
842	b0832	chromosome	Protein_Coding	protein_coding	34	61.8	24.2857	Regional	gsiD	glutathione ABC transporter permease	WP_001236051.1	Not Essential
843	b0833	chromosome	Protein_Coding	protein_coding	143	19.6	11.8571	Regional	yliE	putative membrane-anchored cyclic-di-GMP phosphodiesterase	WP_001360263.1	Not Essential
844	b0834	chromosome	Protein_Coding	protein_coding	85	51.8	19.9091	Regional	yliF	putative membrane-anchored diguanylate cyclase	WP_000086904.1	Not Essential
845	b0835	chromosome	Protein_Coding	protein_coding	44	68.2	28.9	Neutral	rimO	ribosomal protein S12 methylthiotransferase	WP_000049367.1	Not Essential
846	b0836	chromosome	Protein_Coding	protein_coding	13	76.9	14.3	Neutral	bssR	repressor of biofilm formation by indole transport regulation	WP_000497137.1	Not Essential
847	b0837	chromosome	Protein_Coding	protein_coding	48	58.3	25.1786	Neutral	yliI	soluble aldose sugar dehydrogenase	WP_000555031.1	Not Essential
848	b0838	chromosome	Protein_Coding	protein_coding	21	42.9	28.7778	Neutral	gstB	glutathione S-transferase	WP_001295292.1	Not Essential
849	b0839	chromosome	Protein_Coding	protein_coding	45	55.6	25.04	Neutral	dacC	D-alanyl-D-alanine carboxypeptidase; penicillin-binding protein 6a	WP_001300708.1	Not Essential
850	b0840	chromosome	Protein_Coding	protein_coding	31	71	36.6364	Neutral	deoR	deoxyribose-5-phosphate-inducible deoxyribose operon transcriptional repressor; repressor of nupG and tsx	WP_000450121.1	Not Essential
851	b0841	chromosome	Protein_Coding	protein_coding	26	73.1	34.6842	Neutral	ybjG	undecaprenyl pyrophosphate phosphatase	WP_001295291.1	Not Essential
852	b0842	chromosome	Protein_Coding	protein_coding	55	67.3	35.3784	Neutral	mdfA	multidrug efflux system protein	WP_001180089.1	Not Essential
853	b0843	chromosome	Protein_Coding	protein_coding	11	72.7	41.5	Neutral	ybjH	uncharacterized protein	WP_000605480.1	Not Essential
854	b0844	chromosome	Protein_Coding	protein_coding	48	54.2	24.3462	Neutral	ybjI	5-amino-6-(5-phospho-D-ribitylamino)uracil phosphatase; pyrimidine phosphatase; riboflavin synthesis	WP_000023565.1	Not Essential
855	b0845	chromosome	Protein_Coding	protein_coding	53	62.3	32.5152	Neutral	ybjJ	putative drug efflux MFS transporter, inner membrane protein	WP_000217859.1	Not Essential
856	b0846	chromosome	Protein_Coding	protein_coding	28	53.6	15.1333	Neutral	rcdA	transcriptional regulator of csgD and ybiJI; autoregulator	WP_001295289.1	Not Essential
857	b0847	chromosome	Protein_Coding	protein_coding	85	70.6	33.4833	Neutral	ybjL	putative transporter	WP_001024876.1	Not Essential
858	b0848	chromosome	Protein_Coding	protein_coding	11	54.5	13.8333	Neutral	ybjM	inner membrane protein	WP_000681108.1	Not Essential
859	b0849	chromosome	Protein_Coding	protein_coding	13	84.6	39.4545	Neutral	grxA	glutaredoxin 1, redox coenzyme for ribonucleotide reductase (RNR1a)	WP_001195240.1	Not Essential
860	b0850	chromosome	Protein_Coding	protein_coding	9	33.3	9	Neutral	ybjC	DUF1418 family protein	WP_001201560.1	Not Essential
861	b0851	chromosome	Protein_Coding	protein_coding	34	64.7	30.1364	Neutral	nfsA	nitroreductase A, NADPH-dependent, FMN-dependent	WP_000189159.1	Not Essential
862	b0852	chromosome	Protein_Coding	protein_coding	30	83.3	27.44	Neutral	rimK	ribosomal protein S6 modification protein	WP_000684321.1	Not Essential
863	b0853	chromosome	Protein_Coding	protein_coding	16	56.2	25.3333	Neutral	ybjN	negative regulator of motility; multicopy suppressor of coaA(Ts)	WP_000203025.1	Not Essential
864	b0854	chromosome	Protein_Coding	protein_coding	44	56.8	17.88	Neutral	potF	putrescine ABC transporter periplasmic binding protein	WP_000126072.1	Not Essential
865	b0855	chromosome	Protein_Coding	protein_coding	37	56.8	29.4762	Neutral	potG	putrescine ABC transporter ATPase	WP_000996005.1	Not Essential
866	b0856	chromosome	Protein_Coding	protein_coding	47	59.6	26.1071	Neutral	potH	putrescine ABC transporter permease	WP_000105430.1	Not Essential
867	b0857	chromosome	Protein_Coding	protein_coding	29	62.1	25.6667	Neutral	potI	putrescine ABC transporter permease	WP_001061658.1	Not Essential
868	b0858	chromosome	Protein_Coding	protein_coding	16	68.8	28.4545	Neutral	ybjO	DUF2593 family inner membrane protein	WP_000389260.1	Not Essential
869	b0859	chromosome	Protein_Coding	protein_coding	50	60	21.5	Neutral	rlmC	23S rRNA m(5)U747 methyltransferase, SAM-dependent	WP_001149682.1	Not Essential
870	b0860	chromosome	Protein_Coding	protein_coding	43	67.4	15.8966	Neutral	artJ	arginine ABC transporter periplasmic binding protein	WP_001295339.1	Not Essential
871	b0861	chromosome	Protein_Coding	protein_coding	34	50	40.4118	Neutral	artM	arginine ABC transporter permease	WP_000464491.1	Not Essential
872	b0862	chromosome	Protein_Coding	protein_coding	21	61.9	14.2308	Neutral	artQ	arginine ABC transporter permease	WP_001001691.1	Not Essential
873	b0863	chromosome	Protein_Coding	protein_coding	26	61.5	11	Neutral	artI	arginine transporter subunit	WP_000756569.1	Not Essential
874	b0864	chromosome	Protein_Coding	protein_coding	30	73.3	28.7273	Neutral	artP	arginine ABC transporter ATPase	WP_000027205.1	Not Essential
875	b0865	chromosome	Protein_Coding	protein_coding	24	54.2	40.9231	Neutral	ybjP	lipoprotein	WP_001270734.1	Not Essential
876	b0866	chromosome	Protein_Coding	protein_coding	15	46.7	23.7143	Neutral	ybjQ	UPF0145 family protein	WP_001160737.1	Not Essential
877	b0867	chromosome	Protein_Coding	protein_coding	36	52.8	22.7368	Neutral	amiD	1,6-anhydro-N-acetylmuramyl-L-alanine amidase, Zn-dependent; OM lipoprotein	WP_001252135.1	Not Essential
878	b0868	chromosome	Protein_Coding	protein_coding	46	69.6	27.4688	Neutral	ybjS	putative NAD(P)H-dependent oxidoreductase	WP_001338420.1	Not Essential
879	b0869	chromosome	Protein_Coding	protein_coding	57	68.4	29.3846	Neutral	ybjT	putative NAD-dependent oxidoreductase	WP_001136554.1	Not Essential
880	b0870	chromosome	Protein_Coding	protein_coding	36	63.9	41.7826	Neutral	ltaE	L-allo-threonine aldolase, PLP-dependent	WP_000566376.1	Not Essential
881	b0871	chromosome	Protein_Coding	protein_coding	63	58.7	33.0541	Neutral	poxB	pyruvate dehydrogenase, thiamine triphosphate-binding, FAD-binding	WP_000815337.1	Not Essential
882	b0872	chromosome	Protein_Coding	protein_coding	40	70	29.0357	Neutral	hcr	HCP oxidoreductase, NADH-dependent	WP_000178677.1	Not Essential
883	b0873	chromosome	Protein_Coding	protein_coding	54	68.5	26.973	Neutral	hcp	hybrid-cluster [4Fe-2S-2O] subunit of anaerobic terminal reductases	WP_000458809.1	Not Essential
884	b0874	chromosome	Protein_Coding	protein_coding	53	67.9	28.4167	Neutral	ybjE	putative transporter	WP_000491142.1	Not Essential
885	b0875	chromosome	Protein_Coding	protein_coding	33	57.6	19.8421	Neutral	aqpZ	aquaporin Z	WP_001298299.1	Not Essential
886	b0876	chromosome	Protein_Coding	protein_coding	59	42.4	29.28	Neutral	ybjD	putative OLD family ATP-dependent endonuclease; DUF2813 family protein	WP_000599802.1	Not Essential
887	b0877	chromosome	Protein_Coding	protein_coding	44	68.2	37.6333	Neutral	ybjX	DUF535 family protein	WP_000241033.1	Not Essential
888	b0878	chromosome	Protein_Coding	protein_coding	39	64.1	40.68	Neutral	macA	macrolide transporter membrane fusion protein (MFP) component	WP_000746442.1	Not Essential
889	b0879	chromosome	Protein_Coding	protein_coding	71	76.1	47.1111	Neutral	macB	macrolide ABC transporter peremase/ATPase	WP_000188144.1	Not Essential
890	b0880	chromosome	Protein_Coding	protein_coding	9	77.8	77.1429	Neutral	cspD	inhibitor of DNA replication, cold shock protein homolog	WP_000410785.1	Not Essential
891	b0881	chromosome	Protein_Coding	protein_coding	17	82.4	28.5	Neutral	clpS	regulatory protein for ClpA substrate specificity	WP_000520781.1	Not Essential
892	b0882	chromosome	Protein_Coding	protein_coding	76	43.4	10.4545	Regional	clpA	ATPase and specificity subunit of ClpA-ClpP ATP-dependent serine protease, chaperone activity	WP_000934041.1	Not Essential
893	b0883	chromosome	RNA	tRNA	3	66.7	5.5	Neutral	serW	tRNA-Ser	---	Not Essential
894	b0884	chromosome	Protein_Coding	protein_coding	11	0	0	Underrepresented	infA	translation initiation factor IF-1	WP_001040187.1	Essential
895	b0885	chromosome	Protein_Coding	protein_coding	29	65.5	17.6316	Neutral	aat	leucyl/phenylalanyl-tRNA-protein transferase	WP_001241678.1	Not Essential
896	b0886	chromosome	Protein_Coding	protein_coding	67	7.5	25	Underrepresented	cydC	glutathione/cysteine ABC transporter export permease/ATPase	WP_001202177.1	Not Essential
897	b0887	chromosome	Protein_Coding	protein_coding	72	4.2	47.3333	Underrepresented	cydD	glutathione/cysteine ABC transporter export permease/ATPase	WP_001043598.1	Not Essential
898	b0888	chromosome	Protein_Coding	protein_coding	34	2.9	1	Underrepresented	trxB	thioredoxin reductase, FAD/NAD(P)-binding	WP_000537418.1	Not Essential
899	b0889	chromosome	Protein_Coding	protein_coding	29	58.6	31.8824	Neutral	lrp	leucine-responsive global transcriptional regulator	WP_000228473.1	Not Essential
900	b0890	chromosome	Protein_Coding	protein_coding	156	3.2	5	Underrepresented	ftsK	DNA translocase at septal ring sorting daughter chromsomes	WP_000076967.1	Essential
901	b0891	chromosome	Protein_Coding	protein_coding	23	8.7	41.5	Underrepresented	lolA	lipoprotein chaperone	WP_001295343.1	Essential
902	b0892	chromosome	Protein_Coding	protein_coding	61	59	25.0833	Neutral	rarA	recombination intermediate processing DNA-dependent ATPase	WP_000067755.1	Not Essential
903	b0893	chromosome	Protein_Coding	protein_coding	49	4.1	6	Underrepresented	serS	seryl-tRNA synthetase	WP_000886683.1	Essential
904	b0894	chromosome	Protein_Coding	protein_coding	107	65.4	39.1571	Neutral	dmsA	dimethyl sulfoxide reductase, anaerobic, subunit A	WP_000850303.1	Not Essential
905	b0895	chromosome	Protein_Coding	protein_coding	28	53.6	112.6	Neutral	dmsB	dimethyl sulfoxide reductase, anaerobic, subunit B	WP_000213098.1	Not Essential
906	b0896	chromosome	Protein_Coding	protein_coding	33	60.6	37.35	Neutral	dmsC	dimethyl sulfoxide reductase, anaerobic, subunit C	WP_000534637.1	Not Essential
907	b0897	chromosome	Protein_Coding	protein_coding	35	48.6	34.1176	Neutral	ycaC	putative isochorismatase family hydrolase	WP_000165879.1	Not Essential
908	b0898	chromosome	Protein_Coding	protein_coding	53	75.5	47.825	Neutral	ycaD	putative MFS transporter, inner membrane protein	WP_000109259.1	Not Essential
909	b0899	chromosome	Protein_Coding	protein_coding	88	60.2	23.7547	Neutral	ycaM	putative transporter	WP_000918506.1	Not Essential
910	b0900	chromosome	Protein_Coding	protein_coding	47	61.7	31.3103	Neutral	ycaN	LysR family putative transcriptional regulator	WP_001242684.1	Not Essential
911	b0901	chromosome	Protein_Coding	protein_coding	41	58.5	16.875	Neutral	ycaK	putative NAD(P)H-dependent oxidoreductase	WP_001190363.1	Not Essential
912	b0902	chromosome	Protein_Coding	protein_coding	27	70.4	31.5263	Neutral	pflA	pyruvate formate-lyase 1-activating enzyme; [formate-C-acetyltransferase 1]-activating enzyme; PFL activase	WP_000111043.1	Not Essential
913	b0903	chromosome	Protein_Coding	protein_coding	92	70.7	35.4308	Neutral	pflB	formate C-acetyltransferase 1, anaerobic; pyruvate formate-lyase 1	WP_001292822.1	Not Essential
914	b0904	chromosome	Protein_Coding	protein_coding	35	71.4	26.92	Neutral	focA	formate channel	WP_000642546.1	Not Essential
915	b0905	chromosome	Protein_Coding	protein_coding	73	78.1	26.0877	Neutral	ycaO	ribosomal protein S12 methylthiotransferase accessory factor	WP_001295344.1	Not Essential
916	b0906	chromosome	Protein_Coding	protein_coding	32	81.2	24.6538	Neutral	ycaP	UPF0702 family putative inner membrane protein	WP_000642849.1	Not Essential
917	b0907	chromosome	Protein_Coding	protein_coding	45	44.4	18.35	Neutral	serC	3-phosphoserine/phosphohydroxythreonine aminotransferase	WP_000057138.1	Not Essential
918	b0908	chromosome	Protein_Coding	protein_coding	63	58.7	20.6757	Neutral	aroA	5-enolpyruvylshikimate-3-phosphate synthetase	WP_000445231.1	Not Essential
919	b0909	chromosome	Protein_Coding	protein_coding	36	61.1	28.3636	Neutral	ycaL	putative peptidase-related chaperone	WP_001350496.1	Not Essential
920	b0910	chromosome	Protein_Coding	protein_coding	23	0	0	Underrepresented	cmk	cytidylate kinase	WP_000125016.1	Not Essential
921	b0911	chromosome	Protein_Coding	protein_coding	57	0	0	Underrepresented	rpsA	30S ribosomal subunit protein S1	WP_000140327.1	Essential
922	b0912	chromosome	Protein_Coding	protein_coding	15	6.7	1	Underrepresented	ihfB	integration host factor (IHF), DNA-binding protein, beta subunit	WP_000167336.1	Not Essential
923	b0913	chromosome	Protein_Coding	protein_coding	102	71.6	36.0822	Neutral	ycaI	ComEC family inner membrane protein	WP_000705764.1	Not Essential
924	b0914	chromosome	Protein_Coding	protein_coding	65	0	0	Underrepresented	msbA	lipid ABC transporter permease/ATPase	WP_000551270.1	Essential
925	b0915	chromosome	Protein_Coding	protein_coding	35	5.7	34	Underrepresented	lpxK	lipid A 4'kinase	WP_000570539.1	Essential
926	b0916	chromosome	Protein_Coding	protein_coding	51	70.6	20.6389	Neutral	ycaQ	DUF1006 family protein with C-terminal wHTH domain	WP_000056538.1	Not Essential
927	b0917	chromosome	Protein_Coding	protein_coding	4	0	0	Underrepresented	ycaR	peroxide and acid resistance protein, UPF0434 family	WP_000350058.1	Not Essential
928	b0918	chromosome	Protein_Coding	protein_coding	24	0	0	Underrepresented	kdsB	3-deoxy-manno-octulosonate cytidylyltransferase	WP_000011603.1	Essential
929	b0919	chromosome	Protein_Coding	protein_coding	33	75.8	32.2	Neutral	ycbJ	protein kinase-like domain protein	WP_000436922.1	Not Essential
930	b0920	chromosome	Protein_Coding	protein_coding	32	50	16.5625	Neutral	elyC	envelope biogenesis factor; DUF218 superfamily protein	WP_000899600.1	Not Essential
931	b0921	chromosome	Protein_Coding	protein_coding	29	72.4	40.6667	Neutral	smtA	putative S-adenosyl-L-methionine-dependent methyltransferase	WP_001298300.1	Not Essential
932	b0922	chromosome	Protein_Coding	protein_coding	45	0	0	Underrepresented	mukF	chromosome condensin MukBEF, kleisin-like subunit, binds calcium	WP_001288850.1	Essential
933	b0923	chromosome	Protein_Coding	protein_coding	22	0	0	Underrepresented	mukE	chromosome condensin MukBEF, MukE localization factor	WP_001295347.1	Essential
934	b0924	chromosome	Protein_Coding	protein_coding	122	0	0	Underrepresented	mukB	chromosome condensin MukBEF, ATPase and DNA-binding subunit	WP_000572698.1	Essential
935	b0925	chromosome	Protein_Coding	protein_coding	85	70.6	28.4333	Neutral	ldtD	murein L,D-transpeptidase	WP_000925969.1	Not Essential
936	b0926	chromosome	Protein_Coding	protein_coding	33	63.6	28	Neutral	ycbK	M15A protease-related family periplasmic protein	WP_001295932.1	Not Essential
937	b0927	chromosome	Protein_Coding	protein_coding	21	81	32.5294	Neutral	ycbL	putative metal-binding enzyme	WP_001109486.1	Not Essential
938	b0928	chromosome	Protein_Coding	protein_coding	44	50	27.4091	Neutral	aspC	aspartate aminotransferase, PLP-dependent	WP_000462687.1	Not Essential
939	b0929	chromosome	Protein_Coding	protein_coding	66	63.6	34.7857	Neutral	ompF	outer membrane porin 1a (Ia;b;F)	WP_000977920.1	Not Essential
940	b0930	chromosome	Protein_Coding	protein_coding	56	3.6	21	Underrepresented	asnS	asparaginyl tRNA synthetase	WP_000117881.1	Essential
941	b0931	chromosome	Protein_Coding	protein_coding	53	81.1	78.1395	Neutral	pncB	nicotinate phosphoribosyltransferase	WP_001307697.1	Not Essential
942	b0932	chromosome	Protein_Coding	protein_coding	93	79.6	39.7027	Neutral	pepN	aminopeptidase N	WP_000193841.1	Not Essential
943	b0933	chromosome	Protein_Coding	protein_coding	24	45.8	29.9091	Neutral	ssuB	aliphatic sulfonate ABC transporter ATPase	WP_001090506.1	Not Essential
944	b0934	chromosome	Protein_Coding	protein_coding	25	76	31.8947	Neutral	ssuC	aliphatic sulfonate ABC transporter permease	WP_000235203.1	Not Essential
945	b0935	chromosome	Protein_Coding	protein_coding	36	52.8	23.1053	Neutral	ssuD	alkanesulfonate monooxygenase, FMNH(2)-dependent	WP_000056006.1	Not Essential
946	b0936	chromosome	Protein_Coding	protein_coding	45	71.1	43.4375	Neutral	ssuA	aliphatic sulfonate ABC transporter periplasmic binding protein	WP_001244308.1	Not Essential
947	b0937	chromosome	Protein_Coding	protein_coding	23	73.9	25.4706	Neutral	ssuE	NAD(P)H-dependent FMN reductase	WP_001263933.1	Not Essential
948	b0938	chromosome	Protein_Coding	protein_coding	38	50	21.1579	Regional	elfA	laminin-binding fimbrin subunit	WP_000750293.1	Not Essential
949	b0939	chromosome	Protein_Coding	protein_coding	41	41.5	12.8824	Regional	elfD	putative periplasmic pilin chaperone	WP_001295349.1	Not Essential
950	b0940	chromosome	Protein_Coding	protein_coding	148	68.9	37.3431	Neutral	elfC	putative outer membrane fimbrial subunit export usher protein	WP_000286312.1	Not Essential
951	b0941	chromosome	Protein_Coding	protein_coding	63	77.8	33.7959	Neutral	elfG	putative fimbrial-like adhesin protein	WP_001165668.1	Not Essential
952	b0942	chromosome	Protein_Coding	protein_coding	31	67.7	27.1429	Neutral	ycbU	putative fimbriae protein	WP_000730614.1	Not Essential
953	b0943	chromosome	Protein_Coding	protein_coding	26	69.2	47.7778	Neutral	ycbV	putative fimbrial-like adhesin protein	WP_000919497.1	Not Essential
954	b0944	chromosome	Protein_Coding	protein_coding	33	63.6	24.0476	Neutral	ycbF	putative periplasmic pilin chaperone	WP_001307699.1	Not Essential
955	b0945	chromosome	Protein_Coding	protein_coding	59	22	15.4615	Underrepresented	pyrD	dihydro-orotate oxidase, FMN-linked	WP_001295352.1	Not Essential
956	b0946	chromosome	Protein_Coding	protein_coding	19	52.6	14.6	Neutral	zapC	FtsZ stabilizer	WP_001295353.1	Not Essential
957	b0947	chromosome	Protein_Coding	protein_coding	41	70.7	27.1379	Neutral	ycbX	6-N-hydroxylaminopurine detoxification oxidoreductase	WP_000212426.1	Not Essential
958	b0948	chromosome	Protein_Coding	protein_coding	67	47.8	35.6875	Neutral	rlmL	23S rRNA m(2)G2445 and m(7)G2069 methyltransferases, SAM-dependent	WP_001086539.1	Not Essential
959	b0949	chromosome	Protein_Coding	protein_coding	67	34.3	17	Regional	uup	replication regulatory ABC-F family DNA-binding ATPase	WP_000053099.1	Not Essential
960	b0950	chromosome	Protein_Coding	protein_coding	46	69.6	27.25	Neutral	pqiA	paraquat-inducible, SoxRS-regulated inner membrane protein	WP_000333176.1	Not Essential
961	b0951	chromosome	Protein_Coding	protein_coding	59	55.9	25.4545	Neutral	pqiB	paraquat-inducible, SoxRS-regulated MCE domain protein	WP_000445533.1	Not Essential
962	b0952	chromosome	Protein_Coding	protein_coding	24	45.8	17.4545	Neutral	pqiC	DUF330 family putative lipoprotein	WP_000759120.1	Not Essential
963	b0953	chromosome	Protein_Coding	protein_coding	4	50	105	Neutral	rmf	ribosome modulation factor	WP_000828648.1	Not Essential
964	b0954	chromosome	Protein_Coding	protein_coding	22	0	0	Underrepresented	fabA	beta-hydroxydecanoyl thioester dehydrase	WP_000227927.1	Essential
965	b0955	chromosome	Protein_Coding	protein_coding	66	66.7	27.9773	Neutral	ycbZ	putative peptidase	WP_000156518.1	Not Essential
966	b0956	chromosome	Protein_Coding	protein_coding	16	50	13.5	Neutral	matP	Ter macrodomain organizer matS-binding protein	WP_000877161.1	Not Essential
967	b0957	chromosome	Protein_Coding	protein_coding	41	39	10.9375	Neutral	ompA	outer membrane protein A (3a;II*;G;d)	WP_000750416.1	Not Essential
968	b0958	chromosome	Protein_Coding	protein_coding	26	50	35.1538	Neutral	sulA	SOS cell division inhibitor	WP_000288710.1	Not Essential
969	b0959	chromosome	Protein_Coding	protein_coding	26	65.4	28.0588	Regional	sxy	CRP-S-dependent promoter expression factor	WP_000839153.1	Not Essential
970	b0960	chromosome	Protein_Coding	protein_coding	95	71.6	44.5	Neutral	yccS	putative transporter, FUSC superfamily inner membrane protein	WP_001382153.1	Not Essential
971	b0961	chromosome	Protein_Coding	protein_coding	20	55	24.8182	Neutral	yccF	DUF307 family inner membrane protein	WP_001261235.1	Not Essential
972	b0962	chromosome	Protein_Coding	protein_coding	66	54.5	20.8611	Neutral	helD	DNA helicase IV	WP_001295354.1	Not Essential
973	b0963	chromosome	Protein_Coding	protein_coding	17	58.8	41	Neutral	mgsA	methylglyoxal synthase	WP_000424181.1	Not Essential
974	b0964	chromosome	Protein_Coding	protein_coding	24	41.7	45.6	Neutral	yccT	UPF0319 family protein	WP_000847791.1	Not Essential
975	b0965	chromosome	Protein_Coding	protein_coding	15	53.3	21.5	Neutral	yccU	putative CoA-binding protein	WP_001301418.1	Not Essential
976	b0966	chromosome	Protein_Coding	protein_coding	16	50	28.875	Neutral	hspQ	heat shock protein involved in degradation of mutant DnaA; hemimethylated oriC DNA-binding protein	WP_001295356.1	Not Essential
977	b0967	chromosome	Protein_Coding	protein_coding	52	69.2	22.6667	Neutral	rlmI	23S rRNA m(5)C1962 methyltransferase, SAM-dependent	WP_000116297.1	Not Essential
978	b0968	chromosome	Protein_Coding	protein_coding	13	69.2	25	Neutral	yccX	weak acylphosphatase	WP_000048252.1	Not Essential
979	b0969	chromosome	Protein_Coding	protein_coding	17	0	0	Underrepresented	tusE	mnm(5)-s(2)U34-tRNA 2-thiolation sulfurtransferase	WP_000904442.1	Not Essential
980	b0970	chromosome	Protein_Coding	protein_coding	38	60.5	34.6087	Neutral	yccA	Modulator of FtsH protease, inner membrane protein	WP_000375136.1	Not Essential
981	b0972	chromosome	Protein_Coding	protein_coding	40	70	34.7143	Neutral	hyaA	hydrogenase 1, small subunit	WP_001058323.1	Not Essential
982	b0973	chromosome	Protein_Coding	protein_coding	52	51.9	44.7407	Neutral	hyaB	hydrogenase 1, large subunit	WP_000107384.1	Not Essential
983	b0974	chromosome	Protein_Coding	protein_coding	33	60.6	34.65	Neutral	hyaC	hydrogenase 1, b-type cytochrome subunit	WP_001186424.1	Not Essential
984	b0975	chromosome	Protein_Coding	protein_coding	16	56.2	35	Neutral	hyaD	hydrogenase 1 maturation protease	WP_000003671.1	Not Essential
985	b0976	chromosome	Protein_Coding	protein_coding	13	76.9	41.8	Neutral	hyaE	putative HyaA chaperone	WP_000063978.1	Not Essential
986	b0977	chromosome	Protein_Coding	protein_coding	31	67.7	44.6667	Neutral	hyaF	hydrogenase-1 protein nickel incorporation factor	WP_000004899.1	Not Essential
987	b0978	chromosome	Protein_Coding	protein_coding	65	56.9	31.7027	Neutral	cbdA	cytochrome bd-II oxidase, subunit I	WP_000263582.1	Not Essential
988	b0979	chromosome	Protein_Coding	protein_coding	34	67.6	45.2609	Neutral	cbdB	cytochrome bd-II oxidase, subunit II	WP_000460803.1	Not Essential
989	b4592	chromosome	Protein_Coding	protein_coding	4	50	19	Neutral	cbdX	putative cytochrome bd-II oxidase subunit	WP_000270305.1	Not Essential
990	b0980	chromosome	Protein_Coding	protein_coding	48	56.2	31.1852	Neutral	appA	phosphoanhydride phosphorylase	WP_001300464.1	Not Essential
991	b0981	chromosome	Protein_Coding	protein_coding	101	61.4	35.9516	Neutral	etk	tyrosine-protein kinase, role in O-antigen capsule formation	WP_000208650.1	Not Essential
992	b0982	chromosome	Protein_Coding	protein_coding	17	64.7	34.6364	Neutral	etp	O-antigen capsule forming protein-tyrosine-phosphatase; Etk-P dephosphorylase	WP_000057871.1	Not Essential
993	b0983	chromosome	Protein_Coding	protein_coding	47	55.3	32.1538	Neutral	gfcE	putative O-antigen capsule outer membrane auxillary protein export channel	WP_001295357.1	Not Essential
994	b0984	chromosome	Protein_Coding	protein_coding	104	68.3	33.6338	Neutral	gfcD	putative O-antigen capsule production periplasmic protein	WP_000742328.1	Not Essential
995	b0985	chromosome	Protein_Coding	protein_coding	34	67.6	23.7391	Neutral	gfcC	putative O-antigen capsule production periplasmic protein	WP_001038079.1	Not Essential
996	b0986	chromosome	Protein_Coding	protein_coding	37	40.5	19	Neutral	gfcB	O-antigen capsule production lipoprotein	WP_001247610.1	Not Essential
997	b0987	chromosome	Protein_Coding	protein_coding	10	90	59.5556	Neutral	gfcA	O-antigen capsule production threonine-rich inner membrane protein	WP_001295358.1	Not Essential
998	b4516	chromosome	Protein_Coding	protein_coding	8	75	30.5	Neutral	insA	IS1 repressor TnpA	WP_000179210.1	Not Essential
999	b0988	chromosome	Protein_Coding	protein_coding	22	90.9	33.85	Neutral	insB1	IS1 transposase B	WP_001119339.1	Not Essential
1000	b0989	chromosome	Protein_Coding	protein_coding	10	20	2.5	Underrepresented	cspH	stress protein, member of the CspA-family	WP_000087763.1	Not Essential
1001	b0990	chromosome	Protein_Coding	protein_coding	10	30	34	Neutral	cspG	cold shock protein homolog, cold-inducible	WP_000066490.1	Not Essential
1002	b0991	chromosome	Protein_Coding	protein_coding	19	26.3	10.6	Neutral	ymcE	cold shock gene	WP_001309400.1	Not Essential
1003	b4517	chromosome	Protein_Coding	protein_coding	5	60	1.33333	Neutral	gnsA	putative phosphatidylethanolamine synthesis regulator	WP_001019197.1	Not Essential
1004	b0992	chromosome	Protein_Coding	protein_coding	62	64.5	29.375	Neutral	yccM	putative 4Fe-4S membrane protein	WP_000829662.1	Not Essential
1005	b0993	chromosome	Protein_Coding	protein_coding	97	59.8	37.069	Neutral	torS	hybrid sensory histidine kinase in two-component regulatory system with TorR	WP_001300633.1	Not Essential
1006	b0994	chromosome	Protein_Coding	protein_coding	42	54.8	21	Neutral	torT	periplasmic sensory protein associated with the TorRS two-component regulatory system	WP_001264933.1	Not Essential
1007	b0995	chromosome	Protein_Coding	protein_coding	33	51.5	37.8824	Neutral	torR	response regulator in two-component regulatory system with TorS	WP_001120125.1	Not Essential
1008	b0996	chromosome	Protein_Coding	protein_coding	46	50	35.8696	Neutral	torC	trimethylamine N-oxide (TMAO) reductase I, cytochrome c-type subunit	WP_001230242.1	Not Essential
1009	b0997	chromosome	Protein_Coding	protein_coding	92	68.5	39.4762	Neutral	torA	trimethylamine N-oxide (TMAO) reductase I, catalytic subunit	WP_001062091.1	Not Essential
1010	b0998	chromosome	Protein_Coding	protein_coding	16	68.8	30.8182	Neutral	torD	TorA-maturation chaperone	WP_000209894.1	Not Essential
1011	b0999	chromosome	Protein_Coding	protein_coding	11	45.5	3.2	Neutral	cbpM	modulator of CbpA co-chaperone	WP_000024560.1	Not Essential
1012	b1000	chromosome	Protein_Coding	protein_coding	30	66.7	31.15	Neutral	cbpA	DnaK co-chaperone; curved DNA-binding protein	WP_000420621.1	Not Essential
1013	b1001	chromosome	Protein_Coding	protein_coding	111	9	5.7	Underrepresented	yccE	uncharacterized protein	WP_000535346.1	Not Essential
1014	b1002	chromosome	Protein_Coding	protein_coding	54	64.8	50.1429	Neutral	agp	glucose-1-phosphatase/inositol phosphatase	WP_001044279.1	Not Essential
1015	b1003	chromosome	Protein_Coding	protein_coding	9	33.3	34.6667	Neutral	yccJ	uncharacterized protein	WP_001143120.1	Not Essential
1016	b1004	chromosome	Protein_Coding	protein_coding	30	56.7	31.7059	Neutral	wrbA	NAD(P)H:quinone oxidoreductase	WP_001151437.1	Not Essential
1017	b4518	chromosome	Protein_Coding	protein_coding	5	80	13.75	Neutral	ymdF	KGG family protein	WP_001273658.1	Not Essential
1018	b1006	chromosome	Protein_Coding	protein_coding	53	66	22.8	Neutral	rutG	pyrimidine permease	WP_001326838.1	Not Essential
1019	b1007	chromosome	Protein_Coding	protein_coding	12	75	20.7778	Neutral	rutF	flavin:NADH reductase	WP_001028083.1	Not Essential
1020	b1008	chromosome	Protein_Coding	protein_coding	21	57.1	14.3333	Neutral	rutE	putative malonic semialdehyde reductase	WP_001001176.1	Not Essential
1021	b1009	chromosome	Protein_Coding	protein_coding	33	66.7	30.1364	Neutral	rutD	putative reactive intermediate detoxifying aminoacrylate hydrolase	WP_000777653.1	Not Essential
1022	b1010	chromosome	Protein_Coding	protein_coding	15	53.3	50.75	Neutral	rutC	putative aminoacrylate deaminase, reactive intermediate detoxification; weak enamine/imine deaminase activity	WP_001126780.1	Not Essential
1023	b1011	chromosome	Protein_Coding	protein_coding	20	50	33.8	Neutral	rutB	ureidoacrylate amidohydrolase	WP_001393558.1	Not Essential
1024	b1012	chromosome	Protein_Coding	protein_coding	36	72.2	43.4231	Neutral	rutA	pyrimidine oxygenase, FMN-dependent	WP_001326839.1	Not Essential
1025	b1013	chromosome	Protein_Coding	protein_coding	20	40	26.875	Neutral	rutR	rut operon transcriptional repressor for	WP_000191701.1	Not Essential
1026	b1014	chromosome	Protein_Coding	protein_coding	142	53.5	25.9474	Neutral	putA	fused DNA-binding transcriptional regulator/proline dehydrogenase/pyrroline-5-carboxylate dehydrogenase	WP_001326840.1	Not Essential
1027	b1015	chromosome	Protein_Coding	protein_coding	61	50.8	23.3871	Neutral	putP	proline:sodium symporter	WP_001018479.1	Not Essential
1028	b4490	chromosome	Pseudogene	pseudogene	20	75	20.4	Neutral	efeU	---	---	Not Essential
1029	b1018	chromosome	Protein_Coding	protein_coding	40	60	29.9167	Neutral	efeO	inactive ferrous ion transporter EfeUOB	WP_000154398.1	Not Essential
1030	b1019	chromosome	Protein_Coding	protein_coding	38	52.6	27.75	Neutral	efeB	deferrrochelatase, periplasmic	WP_001199471.1	Not Essential
1031	b1020	chromosome	Protein_Coding	protein_coding	44	68.2	15.0333	Neutral	phoH	ATP-binding protein; putative PhoH family P-loop ATPase	WP_000258765.1	Not Essential
1032	b1021	chromosome	Protein_Coding	protein_coding	28	60.7	22.2941	Neutral	pgaD	biofilm PGA synthase PgaCD, regulatory subunit; c-di-GMP-stimulated activity and dimerization	WP_001061095.1	Not Essential
1033	b1022	chromosome	Protein_Coding	protein_coding	78	50	16.0256	Neutral	pgaC	biofilm PGA synthase PgaCD, catalytic subunit; poly-beta-1,6-N-acetyl-D-glucosamine synthase	WP_000610451.1	Not Essential
1034	b1023	chromosome	Protein_Coding	protein_coding	122	37.7	17.0652	Regional	pgaB	poly-beta-1,6-N-acetyl-D-glucosamine (PGA) N-deacetylase outer membrane export lipoprotein	WP_000945561.1	Not Essential
1035	b1024	chromosome	Protein_Coding	protein_coding	145	46.2	23.3731	Neutral	pgaA	biofilm adhesin polysaccharide PGA secretin; OM porin; poly-beta-1,6-N-acetyl-D-glucosamine export protein	WP_000287458.1	Not Essential
1036	b1025	chromosome	Protein_Coding	protein_coding	104	25	18.0385	Regional	ycdT	diguanylate cyclase, membrane-anchored	WP_000409873.1	Not Essential
1037	b1026	chromosome	Protein_Coding	protein_coding	33	84.8	33.8214	Neutral	insF1	IS3 transposase B	WP_000878218.1	Not Essential
1038	b1027	chromosome	Protein_Coding	protein_coding	10	80	28.125	Neutral	insE1	IS3 transposase A	WP_000169527.1	Not Essential
1039	b1028	chromosome	Pseudogene	pseudogene	20	25	19.8	Regional	ymdE	---	---	Not Essential
1040	b1029	chromosome	Protein_Coding	protein_coding	69	27.5	15.7368	Regional	ycdU	putative inner membrane protein	WP_000611859.1	Not Essential
1041	b1032	chromosome	RNA	tRNA	3	100	2.66667	Neutral	serX	tRNA-Ser	---	Not Essential
1042	b1033	chromosome	Protein_Coding	protein_coding	38	60.5	19.0435	Neutral	ghrA	glyoxylate/hydroxypyruvate reductase A	WP_000351317.1	Not Essential
1043	b1034	chromosome	Protein_Coding	protein_coding	36	58.3	64.7143	Neutral	ycdX	alkaline phosphatase	WP_000283667.1	Not Essential
1044	b1035	chromosome	Protein_Coding	protein_coding	17	47.1	26.25	Neutral	ycdY	redox enzyme maturation protein (REMP) chaperone for YcdX	WP_001001921.1	Not Essential
1045	b1036	chromosome	Protein_Coding	protein_coding	22	63.6	43.0714	Neutral	ycdZ	DUF1097 family inner membrane protein	WP_001300785.1	Not Essential
1046	b1037	chromosome	Protein_Coding	protein_coding	39	53.8	23.381	Neutral	csgG	curli production assembly/transport outer membrane lipoprotein	WP_001189321.1	Not Essential
1047	b1038	chromosome	Protein_Coding	protein_coding	31	41.9	11.3846	Neutral	csgF	curli nucleation outer membrane protein	WP_001264088.1	Not Essential
1048	b1039	chromosome	Protein_Coding	protein_coding	24	37.5	19.2222	Neutral	csgE	curlin secretion specificity factor	WP_000833288.1	Not Essential
1049	b1040	chromosome	Protein_Coding	protein_coding	48	35.4	20.5882	Regional	csgD	csgBAC operon transcriptional regulator	WP_000481509.1	Not Essential
1050	b1041	chromosome	Protein_Coding	protein_coding	37	24.3	13.7778	Underrepresented	csgB	curlin nucleator protein, minor subunit in curli complex	WP_000791650.1	Not Essential
1051	b1042	chromosome	Protein_Coding	protein_coding	23	60.9	27.1429	Regional	csgA	curlin subunit, amyloid curli fibers, cryptic	WP_000771437.1	Not Essential
1052	b1043	chromosome	Protein_Coding	protein_coding	19	68.4	16.7692	Neutral	csgC	curli assembly protein	WP_001094300.1	Not Essential
1053	b1044	chromosome	Protein_Coding	protein_coding	16	43.8	17.8571	Neutral	ymdA	uncharacterized protein	WP_000489587.1	Not Essential
1054	b1045	chromosome	Protein_Coding	protein_coding	28	50	27.5	Neutral	ymdB	O-acetyl-ADP-ribose deacetylase; RNase III inhibitor during cold shock; putative cardiolipin synthase C regulatory subunit	WP_000857405.1	Not Essential
1055	b1046	chromosome	Protein_Coding	protein_coding	66	62.1	30.0488	Neutral	clsC	stationary phase cardiolipin synthase 3	WP_001299031.1	Not Essential
1056	b1047	chromosome	Protein_Coding	protein_coding	79	48.1	23.9474	Neutral	opgC	OPG biosynthetic transmembrane succinyltransferase	WP_001070375.1	Not Essential
1057	b1048	chromosome	Protein_Coding	protein_coding	63	44.4	30.75	Neutral	opgG	OPG biosynthetic periplasmic beta-1,6 branching glycosyltransferase	WP_001343212.1	Not Essential
1058	b1049	chromosome	Protein_Coding	protein_coding	87	48.3	23.2619	Neutral	opgH	OPG biosynthetic ACP-dependent transmembrane UDP-glucose beta-1,2 glycosyltransferase; nutrient-dependent cell size regulator, FtsZ assembly antagonist	WP_001295445.1	Not Essential
1059	b1050	chromosome	Protein_Coding	protein_coding	11	72.7	49.25	Neutral	yceK	outer membrane integrity lipoprotein	WP_001237205.1	Not Essential
1060	b1051	chromosome	Protein_Coding	protein_coding	12	66.7	46.625	Neutral	msyB	multicopy suppressor of secY and secA	WP_000180056.1	Not Essential
1061	b1053	chromosome	Protein_Coding	protein_coding	61	60.7	32.5676	Neutral	mdtG	putative drug efflux system protein	WP_000074172.1	Not Essential
1062	b1054	chromosome	Protein_Coding	protein_coding	35	2.9	1	Underrepresented	lpxL	lauryl-acyl carrier protein (ACP)-dependent acyltransferase	WP_000183364.1	Not Essential
1063	b1055	chromosome	Protein_Coding	protein_coding	49	53.1	27.3462	Neutral	yceA	putative rhodanese-related sulfurtransferase	WP_001144615.1	Not Essential
1064	b1056	chromosome	Protein_Coding	protein_coding	28	53.6	35	Neutral	yceI	periplasmic high pH-inducible lipid-binding protein	WP_000749261.1	Not Essential
1065	b1057	chromosome	Protein_Coding	protein_coding	30	70	33.2857	Neutral	yceJ	putative cytochrome b561	WP_000011114.1	Not Essential
1066	b1058	chromosome	Protein_Coding	protein_coding	11	45.5	5.4	Underrepresented	yceO	uncharacterized protein	WP_001323065.1	Not Essential
1067	b1059	chromosome	Protein_Coding	protein_coding	50	50	23.88	Neutral	solA	N-methyltryptophan oxidase, FAD-binding	WP_000872833.1	Not Essential
1068	b1060	chromosome	Protein_Coding	protein_coding	13	61.5	25.25	Neutral	bssS	biofilm regulator	WP_000414438.1	Not Essential
1069	b1061	chromosome	Protein_Coding	protein_coding	15	40	7	Underrepresented	dinI	DNA damage-inducible protein I	WP_001217754.1	Not Essential
1070	b1062	chromosome	Protein_Coding	protein_coding	41	26.8	12.8182	Regional	pyrC	dihydro-orotase	WP_000126534.1	Not Essential
1071	b1063	chromosome	Protein_Coding	protein_coding	22	63.6	39.3571	Neutral	yceB	lipoprotein, DUF1439 family	WP_001295443.1	Not Essential
1072	b1064	chromosome	Protein_Coding	protein_coding	29	58.6	20.8235	Neutral	grxB	glutaredoxin 2 (Grx2)	WP_000780912.1	Not Essential
1073	b1065	chromosome	Protein_Coding	protein_coding	42	66.7	38.1429	Neutral	mdtH	multidrug resistance efflux transporter conferring overexpression resistance to norfloxacin and enoxacin	WP_000092206.1	Not Essential
1074	b1066	chromosome	Protein_Coding	protein_coding	28	67.9	47.1053	Neutral	rimJ	ribosomal-protein-S5-alanine N-acetyltransferase	WP_000468186.1	Not Essential
1075	b1067	chromosome	Protein_Coding	protein_coding	20	80	21.1875	Neutral	yceH	UPF0502 family protein	WP_000877107.1	Not Essential
1076	b1068	chromosome	Protein_Coding	protein_coding	34	55.9	46.3158	Neutral	yceM	putative oxidoreductase	WP_000736158.1	Not Essential
1077	b1069	chromosome	Protein_Coding	protein_coding	56	1.8	7	Underrepresented	murJ	putative lipid II flippase	WP_001050683.1	Essential
1078	b1070	chromosome	Protein_Coding	protein_coding	18	61.1	28.0909	Neutral	flgN	export chaperone for FlgK and FlgL	WP_000197363.1	Not Essential
1079	b1071	chromosome	Protein_Coding	protein_coding	9	55.6	30.6	Neutral	flgM	anti-sigma factor for FliA (sigma 28)	WP_000020880.1	Not Essential
1080	b1072	chromosome	Protein_Coding	protein_coding	34	55.9	18.7895	Neutral	flgA	assembly protein for flagellar basal-body periplasmic P ring	WP_000905458.1	Not Essential
1081	b1073	chromosome	Protein_Coding	protein_coding	17	47.1	32.625	Neutral	flgB	flagellar component of cell-proximal portion of basal-body rod	WP_000884702.1	Not Essential
1082	b1074	chromosome	Protein_Coding	protein_coding	19	57.9	35.1818	Neutral	flgC	flagellar component of cell-proximal portion of basal-body rod	WP_001196460.1	Not Essential
1083	b1075	chromosome	Protein_Coding	protein_coding	25	60	39.8667	Neutral	flgD	flagellar hook assembly protein	WP_000020486.1	Not Essential
1084	b1076	chromosome	Protein_Coding	protein_coding	58	56.9	41.2727	Neutral	flgE	flagellar hook protein	WP_000885873.1	Not Essential
1085	b1077	chromosome	Protein_Coding	protein_coding	20	50	60.8	Neutral	flgF	flagellar component of cell-proximal portion of basal-body rod	WP_000349316.1	Not Essential
1086	b1078	chromosome	Protein_Coding	protein_coding	25	72	25.2778	Neutral	flgG	flagellar component of cell-distal portion of basal-body rod	WP_000625837.1	Not Essential
1087	b1079	chromosome	Protein_Coding	protein_coding	34	58.8	36.55	Neutral	flgH	flagellar protein of basal-body outer-membrane L ring	WP_001295442.1	Not Essential
1088	b1080	chromosome	Protein_Coding	protein_coding	43	60.5	28.7308	Neutral	flgI	putative flagellar basal body protein	WP_000589326.1	Not Essential
1089	b1081	chromosome	Protein_Coding	protein_coding	31	61.3	39.8947	Neutral	flgJ	flagellar rod assembly protein and murein hydrolase; flagellum-specific muramidase	WP_001295441.1	Not Essential
1090	b1082	chromosome	Protein_Coding	protein_coding	77	63.6	35.2041	Neutral	flgK	flagellar hook-filament junction protein 1	WP_000096479.1	Not Essential
1091	b1083	chromosome	Protein_Coding	protein_coding	44	56.8	47.48	Neutral	flgL	flagellar hook-filament junction protein	WP_001212782.1	Not Essential
1092	b1084	chromosome	Protein_Coding	protein_coding	94	8.5	6.625	Underrepresented	rne	endoribonuclease; RNA-binding protein;RNA degradosome binding protein	WP_000827360.1	Essential
1093	b1085	chromosome	Protein_Coding	protein_coding	18	22.2	6	Regional	yceQ	uncharacterized protein	WP_001295962.1	Not Essential
1094	b1086	chromosome	Protein_Coding	protein_coding	41	34.1	9	Neutral	rluC	23S rRNA pseudouridine(955,2504,2580) synthase	WP_000846343.1	Not Essential
1095	b1087	chromosome	Protein_Coding	protein_coding	27	55.6	25.3333	Neutral	yceF	m(7)GTP pyrophosphatase	WP_001125202.1	Not Essential
1096	b4418	chromosome	RNA	ncRNA	10	90	29.6667	Neutral	psrD	novel Novel sRNA, function unknown	---	Not Essential
1097	b1088	chromosome	Protein_Coding	protein_coding	24	8.3	8.5	Underrepresented	yceD	DUF177 family protein	WP_001174481.1	Not Essential
1098	b1089	chromosome	Protein_Coding	protein_coding	7	0	0	Underrepresented	rpmF	50S ribosomal subunit protein L32	WP_000290727.1	Not Essential
1099	b1090	chromosome	Protein_Coding	protein_coding	39	51.3	9.8	Neutral	plsX	putative phosphate acyltransferase	WP_000197597.1	Not Essential
1100	b1091	chromosome	Protein_Coding	protein_coding	33	3	1	Underrepresented	fabH	3-oxoacyl-[acyl-carrier-protein] synthase III	WP_000288132.1	Not Essential
1101	b1092	chromosome	Protein_Coding	protein_coding	30	0	0	Underrepresented	fabD	malonyl-CoA-[acyl-carrier-protein] transacylase	WP_000191372.1	Essential
1102	b1093	chromosome	Protein_Coding	protein_coding	27	3.7	518	Underrepresented	fabG	3-oxoacyl-[acyl-carrier-protein] reductase	WP_001008535.1	Essential
1103	b1094	chromosome	Protein_Coding	protein_coding	9	0	0	Underrepresented	acpP	acyl carrier protein (ACP)	WP_000103754.1	Essential
1104	b1095	chromosome	Protein_Coding	protein_coding	55	56.4	34.1613	Neutral	fabF	3-oxoacyl-[acyl-carrier-protein] synthase II	WP_000044679.1	Not Essential
1105	b1096	chromosome	Protein_Coding	protein_coding	39	61.5	30.0417	Neutral	pabC	4-amino-4-deoxychorismate lyase component of para-aminobenzoate synthase multienzyme complex	WP_000478681.1	Not Essential
1106	b1097	chromosome	Protein_Coding	protein_coding	55	67.3	22.5676	Neutral	yceG	septation protein, ampicillin sensitivity	WP_000756827.1	Not Essential
1107	b1098	chromosome	Protein_Coding	protein_coding	27	0	0	Underrepresented	tmk	thymidylate kinase	WP_001257000.1	Essential
1108	b1099	chromosome	Protein_Coding	protein_coding	45	6.7	5.33333	Underrepresented	holB	DNA polymerase III, delta prime subunit	WP_001267956.1	Essential
1109	b1100	chromosome	Protein_Coding	protein_coding	36	55.6	30.65	Neutral	ycfH	putative DNase	WP_000480245.1	Not Essential
1110	b1101	chromosome	Protein_Coding	protein_coding	66	45.5	23.4667	Neutral	ptsG	fused glucose-specific PTS enzymes: IIB component/IIC component	WP_000475719.1	Not Essential
1111	b1102	chromosome	Protein_Coding	protein_coding	117	67.5	37.1646	Neutral	fhuE	ferric-rhodotorulic acid outer membrane transporter	WP_000953441.1	Not Essential
1112	b1103	chromosome	Protein_Coding	protein_coding	17	47.1	15.5	Neutral	hinT	purine nucleoside phosphoramidase, dadA activator protein	WP_000807125.1	Not Essential
1113	b1104	chromosome	Protein_Coding	protein_coding	16	50	16.25	Neutral	ycfL	uncharacterized protein	WP_001225295.1	Not Essential
1114	b1105	chromosome	Protein_Coding	protein_coding	25	28	24	Regional	lpoB	OM lipoprotein stimulator of MrcB transpeptidase	WP_000164439.1	Not Essential
1115	b1106	chromosome	Protein_Coding	protein_coding	40	60	51.0833	Neutral	thiK	thiamine kinase	WP_001116592.1	Not Essential
1116	b1107	chromosome	Protein_Coding	protein_coding	36	55.6	37.95	Neutral	nagZ	beta N-acetyl-glucosaminidase	WP_000529320.1	Not Essential
1117	b1108	chromosome	Protein_Coding	protein_coding	28	71.4	23.75	Neutral	ycfP	putative UPF0227 family esterase	WP_000587933.1	Not Essential
1118	b1109	chromosome	Protein_Coding	protein_coding	52	21.2	10.2727	Underrepresented	ndh	respiratory NADH dehydrogenase 2/cupric reductase	WP_000211045.1	Not Essential
1119	b1110	chromosome	Protein_Coding	protein_coding	24	62.5	20.0667	Neutral	ycfJ	uncharacterized protein	WP_001043459.1	Not Essential
1120	b1111	chromosome	Protein_Coding	protein_coding	20	50	17.7	Neutral	ycfQ	repressor for bhsA(ycfR)	WP_001336528.1	Not Essential
1121	b1112	chromosome	Protein_Coding	protein_coding	12	41.7	4.2	Neutral	bhsA	biofilm, cell surface and signaling protein	WP_000800153.1	Not Essential
1122	b1113	chromosome	Protein_Coding	protein_coding	37	51.4	30.6842	Neutral	ldtC	L,D-transpeptidase linking Lpp to murein	WP_001350500.1	Not Essential
1123	b1114	chromosome	Protein_Coding	protein_coding	105	52.4	24.4182	Neutral	mfd	transcription-repair coupling factor	WP_001115094.1	Not Essential
1124	b1115	chromosome	Protein_Coding	protein_coding	51	66.7	25.8824	Neutral	ycfT	inner membrane protein	WP_000810253.1	Not Essential
1125	b1116	chromosome	Protein_Coding	protein_coding	53	0	0	Underrepresented	lolC	lipoprotein-releasing system transmembrane protein	WP_000284714.1	Essential
1126	b1117	chromosome	Protein_Coding	protein_coding	20	0	0	Underrepresented	lolD	outer membrane-specific lipoprotein transporter subunit	WP_001033694.1	Essential
1127	b1118	chromosome	Protein_Coding	protein_coding	59	0	0	Underrepresented	lolE	lipoprotein-releasing system transmembrane protein	WP_001251348.1	Essential
1128	b1119	chromosome	Protein_Coding	protein_coding	39	61.5	29.875	Neutral	nagK	N-acetyl-D-glucosamine kinase	WP_000291270.1	Not Essential
1129	b1120	chromosome	Protein_Coding	protein_coding	23	56.5	17.0769	Neutral	cobB	deacetylase of acs and cheY, chemotaxis regulator	WP_001325000.1	Not Essential
1130	b1121	chromosome	Protein_Coding	protein_coding	60	35	8.38095	Underrepresented	ycfZ	inner membrane protein	WP_000713462.1	Not Essential
1131	b1122	chromosome	Protein_Coding	protein_coding	34	17.6	8	Regional	ymfA	DUF3592 family inner membrane protein	WP_000076376.1	Not Essential
1132	b1123	chromosome	Protein_Coding	protein_coding	43	44.2	18.3684	Neutral	potD	spermidine/putrescine ABC transporter periplasmic binding protein	WP_000759317.1	Not Essential
1133	b1124	chromosome	Protein_Coding	protein_coding	40	55	13.5	Neutral	potC	spermidine/putrescine ABC transporter permease	WP_000580316.1	Not Essential
1134	b1125	chromosome	Protein_Coding	protein_coding	36	38.9	24.7857	Neutral	potB	spermidine/putrescine ABC transporter permease	WP_001336525.1	Not Essential
1135	b1126	chromosome	Protein_Coding	protein_coding	33	57.6	12.1053	Neutral	potA	spermidine/putrescine ABC transporter ATPase	WP_000531594.1	Not Essential
1136	b1127	chromosome	Protein_Coding	protein_coding	56	46.4	22.1923	Neutral	pepT	peptidase T	WP_000359434.1	Not Essential
1137	b1128	chromosome	Protein_Coding	protein_coding	38	57.9	32.2727	Neutral	roxA	50S ribosomal protein L16 arginine hydroxylase; 2-oxoglutarate oxygenase	WP_000456506.1	Not Essential
1138	b1129	chromosome	Protein_Coding	protein_coding	62	58.1	29.0833	Neutral	phoQ	sensory histidine kinase in two-component regulatory system with PhoP	WP_000735412.1	Not Essential
1139	b1130	chromosome	Protein_Coding	protein_coding	34	70.6	24.8333	Neutral	phoP	response regulator in two-component regulatory system with PhoQ	WP_001265471.1	Not Essential
1140	b1131	chromosome	Protein_Coding	protein_coding	56	0	0	Underrepresented	purB	adenylosuccinate lyase	WP_000423742.1	Not Essential
1141	b1132	chromosome	Protein_Coding	protein_coding	18	16.7	27.3333	Underrepresented	hflD	putative lysogenization regulator	WP_001297479.1	Not Essential
1142	b1133	chromosome	Protein_Coding	protein_coding	38	0	0	Underrepresented	mnmA	tRNA(Gln,Lys,Glu) U34 2-thiouridylase	WP_001297484.1	Essential
1143	b1134	chromosome	Protein_Coding	protein_coding	19	42.1	11.25	Neutral	nudJ	bifunctional thiamine pyrimidine pyrophosphate hydrolase and thiamine pyrophosphate hydrolase	WP_000476093.1	Not Essential
1144	b1135	chromosome	Protein_Coding	protein_coding	29	58.6	20.4118	Neutral	rluE	23S rRNA pseudouridine(2457) synthase	WP_001248691.1	Not Essential
1145	b1136	chromosome	Protein_Coding	protein_coding	51	2	4	Underrepresented	icd	isocitrate dehydrogenase; e14 prophage attachment site; tellurite reductase	WP_000444484.1	Not Essential
1146	b1137	chromosome	Protein_Coding	protein_coding	56	7.1	2.5	Underrepresented	ymfD	e14 prophage; putative SAM-dependent methyltransferase	WP_000241967.1	Not Essential
1147	b1138	chromosome	Protein_Coding	protein_coding	71	2.8	18.5	Underrepresented	ymfE	e14 prophage; putative inner membrane protein	WP_010723094.1	Not Essential
1148	b1139	chromosome	Protein_Coding	protein_coding	58	8.6	13.4	Underrepresented	lit	T4 phage exclusion protein; cell death peptidase, e14 prophage	WP_001257372.1	Not Essential
1149	b1140	chromosome	Protein_Coding	protein_coding	68	57.4	19.2821	Neutral	intE	e14 prophage; putative integrase	WP_000741310.1	Not Essential
1150	b1141	chromosome	Protein_Coding	protein_coding	14	71.4	18.7	Neutral	xisE	e14 prophage; putative excisionase	WP_000939945.1	Not Essential
1151	b1143	chromosome	Protein_Coding	protein_coding	15	33.3	19.6	Neutral	ymfI	e14 prophage; uncharacterized protein	WP_010723095.1	Not Essential
1152	b1144	chromosome	Protein_Coding	protein_coding	13	46.2	25.5	Neutral	ymfJ	e14 prophage; uncharacterized protein	WP_001005353.1	Not Essential
1153	b1145	chromosome	Protein_Coding	protein_coding	35	0	0	Underrepresented	cohE	e14 prophage; repressor protein phage e14	WP_000848748.1	Not Essential
1154	b1146	chromosome	Protein_Coding	protein_coding	13	0	0	Underrepresented	croE	e14 prophage; putative DNA-binding transcriptional regulator	WP_000649480.1	Not Essential
1155	b1147	chromosome	Protein_Coding	protein_coding	17	58.8	18.2	Neutral	ymfL	e14 prophage; putative DNA-binding transcriptional regulator	WP_000515837.1	Not Essential
1156	b1148	chromosome	Protein_Coding	protein_coding	14	64.3	31.6667	Neutral	ymfM	e14 prophage; uncharacterized protein	WP_001350501.1	Not Essential
1157	b4692	chromosome	Pseudogene	pseudogene	11	63.6	24.1429	Neutral	oweE	---	---	Not Essential
1158	b4693	chromosome	Pseudogene	pseudogene	36	63.9	28.2174	Neutral	aaaE	---	---	Not Essential
1159	b1150	chromosome	Protein_Coding	protein_coding	6	50	27.3333	Neutral	ymfR	e14 prophage; uncharacterized protein	WP_000605606.1	Not Essential
1160	b1151	chromosome	Pseudogene	pseudogene	13	69.2	46.4444	Neutral	beeE	---	---	Not Essential
1161	b1152	chromosome	Pseudogene	pseudogene	25	56	46.8571	Neutral	jayE	---	---	Not Essential
1162	b1153	chromosome	Protein_Coding	protein_coding	19	73.7	18.2857	Neutral	ymfQ	prohage e14 tail protein homolog	WP_000383574.1	Not Essential
1163	b1154	chromosome	Protein_Coding	protein_coding	37	59.5	16.9545	Neutral	stfP	e14 prophage; uncharacterized protein	WP_000554703.1	Not Essential
1164	b1155	chromosome	Protein_Coding	protein_coding	23	26.1	9.16667	Neutral	tfaP	e14 prophage; uncharacterized protein	WP_010723096.1	Not Essential
1165	b1156	chromosome	Protein_Coding	protein_coding	35	37.1	33.5385	Regional	tfaE	e14 prophage; putative tail fiber assembly protein	WP_000548498.1	Not Essential
1166	b1157	chromosome	Pseudogene	pseudogene	29	37.9	5.72727	Underrepresented	stfE	---	---	Not Essential
1167	b1158	chromosome	Protein_Coding	protein_coding	20	60	37.0833	Neutral	pinE	e14 prophage; site-specific DNA recombinase	WP_000905001.1	Not Essential
1168	b1159	chromosome	Protein_Coding	protein_coding	67	16.4	12.8182	Regional	mcrA	putative 5-methylcytosine/5-hydroxymethylcytosine-specific restriction nuclease; 5-methylcytosine DNA binding protein	WP_000557907.1	Not Essential
1169	b4519	chromosome	Pseudogene	pseudogene	7	14.3	1	Underrepresented	icdC	---	---	Not Essential
1170	b1160	chromosome	Protein_Coding	protein_coding	38	7.9	1.66667	Underrepresented	iraM	RpoS stabilzer during Mg starvation, anti-RssB factor	WP_001295666.1	Not Essential
1171	b1161	chromosome	Protein_Coding	protein_coding	36	22.2	8.75	Underrepresented	ycgX	DUF1398 family protein	WP_000373101.1	Not Essential
1172	b1162	chromosome	Protein_Coding	protein_coding	30	60	25.2222	Neutral	bluR	repressor of blue light-responsive genes	WP_000332303.1	Not Essential
1173	b1163	chromosome	Protein_Coding	protein_coding	66	43.9	16.1034	Neutral	bluF	anti-repressor for YcgE, blue light-responsive; FAD-binding; inactive c-di-GMP phosphodiesterase-like EAL domain protein	WP_001299269.1	Not Essential
1174	b1164	chromosome	Protein_Coding	protein_coding	9	44.4	8.25	Underrepresented	ycgZ	RcsB connector protein for regulation of biofilm and acid-resistance	WP_000554140.1	Not Essential
1175	b1165	chromosome	Protein_Coding	protein_coding	21	4.8	14	Underrepresented	ymgA	RcsB connector protein for regulation of biofilm	WP_000858002.1	Not Essential
1176	b1166	chromosome	Protein_Coding	protein_coding	24	8.3	2	Underrepresented	ariR	RcsB connector protein for regulation of biofilm and acid-resistance	WP_000888772.1	Not Essential
1177	b1167	chromosome	Protein_Coding	protein_coding	19	15.8	5.33333	Underrepresented	ymgC	Blue light, low temperature and stress induced protein	WP_001065752.1	Not Essential
1178	b1168	chromosome	Protein_Coding	protein_coding	97	24.7	13.125	Regional	ycgG	putative membrane-anchored cyclic-di-GMP phosphodiesterase	WP_001246499.1	Not Essential
1179	b4520	chromosome	Protein_Coding	protein_coding	15	13.3	1	Underrepresented	ymgF	inner membrane division septum protein	WP_001065861.1	Not Essential
1180	b4491	chromosome	Pseudogene	pseudogene	185	30.8	21.7368	Regional	ycgH	---	---	Not Essential
1181	b1171	chromosome	Protein_Coding	protein_coding	14	50	20.8571	Neutral	ymgD	uncharacterized protein	WP_001295611.1	Not Essential
1182	b1172	chromosome	Protein_Coding	protein_coding	15	40	24.3333	Neutral	ymgG	UPF0757 family protein	WP_000726974.1	Not Essential
1183	b4593	chromosome	Protein_Coding	protein_coding	17	11.8	4	Underrepresented	ymgI	uncharacterized protein	WP_000122462.1	Not Essential
1184	b4594	chromosome	Protein_Coding	protein_coding	13	53.8	7.28571	Neutral	ymgJ	uncharacterized protein	WP_001325005.1	Not Essential
1185	b4521	chromosome	Pseudogene	pseudogene	19	68.4	46.8462	Neutral	ycgI	---	---	Not Essential
1186	b1174	chromosome	Protein_Coding	protein_coding	15	6.7	9	Underrepresented	minE	cell division topological specificity factor	WP_001185665.1	Not Essential
1187	b1175	chromosome	Protein_Coding	protein_coding	39	17.9	9.28571	Underrepresented	minD	inhibitor of FtsZ ring polymerization; chromosome-membrane tethering protein; membrane ATPase of the MinCDEE system	WP_000101055.1	Not Essential
1188	b1176	chromosome	Protein_Coding	protein_coding	28	32.1	15.3333	Underrepresented	minC	inhibitor of FtsZ ring polymerization	WP_001301105.1	Not Essential
1189	b1177	chromosome	Protein_Coding	protein_coding	20	40	24.5	Neutral	ycgJ	uncharacterized protein	WP_001056840.1	Not Essential
1190	b1178	chromosome	Protein_Coding	protein_coding	28	57.1	24.125	Neutral	pliG	periplasmic inhibitor of g-type lysozyme	WP_000695215.1	Not Essential
1191	b1179	chromosome	Protein_Coding	protein_coding	13	46.2	15.8333	Neutral	ycgL	UPF0745 family protein	WP_001295992.1	Not Essential
1192	b1180	chromosome	Protein_Coding	protein_coding	24	41.7	14.8	Neutral	ycgM	putative isomerase/hydrolase	WP_000284280.1	Not Essential
1193	b1181	chromosome	Protein_Coding	protein_coding	20	50	38.1	Neutral	ycgN	UPF0153 family cysteine cluster protein	WP_000807626.1	Not Essential
1194	b1182	chromosome	Protein_Coding	protein_coding	59	15.3	11.5556	Underrepresented	hlyE	hemolysin E	WP_001336523.1	Not Essential
1195	b1183	chromosome	Protein_Coding	protein_coding	21	71.4	30.0667	Neutral	umuD	translesion error-prone DNA polymerase V subunit; RecA-activated auto-protease	WP_000897378.1	Not Essential
1196	b1184	chromosome	Protein_Coding	protein_coding	52	59.6	21	Neutral	umuC	translesion error-prone DNA polymerase V subunit; DNA polymerase activity	WP_000457616.1	Not Essential
1197	b1185	chromosome	Protein_Coding	protein_coding	22	22.7	4	Neutral	dsbB	oxidoreductase that catalyzes reoxidation of DsbA protein disulfide isomerase I	WP_000943459.1	Not Essential
1198	b1186	chromosome	Protein_Coding	protein_coding	60	56.7	30.3824	Neutral	nhaB	sodium:proton antiporter	WP_000406391.1	Not Essential
1199	b1187	chromosome	Protein_Coding	protein_coding	37	64.9	27.875	Neutral	fadR	fatty acid metabolism regulon transcriptional regulator	WP_000234823.1	Not Essential
1200	b1188	chromosome	Protein_Coding	protein_coding	76	52.6	29.225	Neutral	ycgB	SpoVR family stationary phase protein	WP_000190854.1	Not Essential
1201	b1189	chromosome	Protein_Coding	protein_coding	50	38	29.9474	Regional	dadA	D-amino acid dehydrogenase	WP_001266908.1	Not Essential
1202	b1190	chromosome	Protein_Coding	protein_coding	41	58.5	30.375	Neutral	dadX	alanine racemase, catabolic, PLP-binding	WP_000197881.1	Not Essential
1203	b1191	chromosome	Protein_Coding	protein_coding	77	63.6	27.2653	Neutral	cvrA	putative cation/proton antiporter	WP_000340194.1	Not Essential
1204	b1192	chromosome	Protein_Coding	protein_coding	37	18.9	22.7143	Underrepresented	ldcA	murein tetrapeptide carboxypeptidase; LD-carboxypeptidase A	WP_000051560.1	Not Essential
1205	b1193	chromosome	Protein_Coding	protein_coding	26	53.8	36.7857	Neutral	emtA	lytic murein endotransglycosylase E	WP_001301104.1	Not Essential
1206	b1194	chromosome	Protein_Coding	protein_coding	30	53.3	19.75	Neutral	ycgR	flagellar velocity braking protein, c-di-GMP-regulated	WP_000020169.1	Not Essential
1207	b1195	chromosome	Protein_Coding	protein_coding	11	45.5	20.8	Neutral	ymgE	UPF0410 family putative inner membrane protein	WP_001310727.1	Not Essential
1208	b1196	chromosome	Protein_Coding	protein_coding	29	44.8	9.92308	Regional	ycgY	uncharacterized protein	WP_000615067.1	Not Essential
1209	b1197	chromosome	Protein_Coding	protein_coding	63	61.9	26.5128	Neutral	treA	periplasmic trehalase	WP_000841714.1	Not Essential
1210	b1198	chromosome	Protein_Coding	protein_coding	71	56.3	18.225	Neutral	dhaM	putative dihydroxyacetone-specific PTS enzymes: HPr, EI components	WP_001301101.1	Not Essential
1211	b1199	chromosome	Protein_Coding	protein_coding	26	50	17.6923	Neutral	dhaL	dihydroxyacetone kinase, C-terminal domain	WP_000059411.1	Not Essential
1212	b1200	chromosome	Protein_Coding	protein_coding	43	65.1	21.3571	Neutral	dhaK	dihydroxyacetone kinase, PTS-dependent, dihydroxyacetone-binding subunit	WP_000733715.1	Not Essential
1213	b1201	chromosome	Protein_Coding	protein_coding	78	62.8	30.2857	Neutral	dhaR	dhaKLM operon transcription activator	WP_001350505.1	Not Essential
1214	b1202	chromosome	Protein_Coding	protein_coding	162	64.2	40.3077	Neutral	ycgV	putative adhesin	WP_001334788.1	Not Essential
1215	b1203	chromosome	Protein_Coding	protein_coding	30	10	15.6667	Underrepresented	ychF	catalase inhibitor protein; ATPase, K+-dependent, ribosome-associated	WP_000505866.1	Not Essential
1216	b1204	chromosome	Protein_Coding	protein_coding	26	15.4	10.75	Underrepresented	pth	peptidyl-tRNA hydrolase	WP_000152933.1	Essential
1217	b1205	chromosome	Protein_Coding	protein_coding	16	25	23.5	Neutral	ychH	DUF2583 family putative inner membrane protein	WP_000823885.1	Not Essential
1218	b1206	chromosome	Protein_Coding	protein_coding	62	67.7	37.3333	Neutral	dauA	C4-dicarboxylic acid transporter	WP_001033352.1	Not Essential
1219	b1207	chromosome	Protein_Coding	protein_coding	43	0	0	Underrepresented	prs	phosphoribosylpyrophosphate synthase	WP_001298109.1	Essential
1220	b1208	chromosome	Protein_Coding	protein_coding	28	0	0	Underrepresented	ispE	4-diphosphocytidyl-2-C-methylerythritol kinase	WP_001260332.1	Essential
1221	b1209	chromosome	Protein_Coding	protein_coding	29	3.4	14	Underrepresented	lolB	lipoprotein localization factor	WP_001130692.1	Essential
1222	b1210	chromosome	Protein_Coding	protein_coding	45	0	0	Underrepresented	hemA	glutamyl tRNA reductase	WP_001299679.1	Essential
1223	b1211	chromosome	Protein_Coding	protein_coding	42	0	0	Underrepresented	prfA	peptide chain release factor RF-1	WP_000804726.1	Essential
1224	b1212	chromosome	Protein_Coding	protein_coding	33	3	22	Underrepresented	prmC	RF-1 and RF-2 N5-glutamine methyltransferase	WP_000456467.1	Essential
1225	b1213	chromosome	Protein_Coding	protein_coding	26	53.8	22.5	Neutral	ychQ	SIRB family inner membrane protein	WP_000200374.1	Not Essential
1226	b1214	chromosome	Protein_Coding	protein_coding	40	42.5	15.9412	Neutral	ychA	transglutaminase-like TPR-repeat protein	WP_001257044.1	Not Essential
1227	b1215	chromosome	Protein_Coding	protein_coding	26	3.8	1	Underrepresented	kdsA	3-deoxy-D-manno-octulosonate 8-phosphate synthase	WP_000811065.1	Essential
1228	b4419	chromosome	Protein_Coding	protein_coding	5	80	36	Neutral	ldrA	toxic polypeptide, small	WP_000170955.1	Not Essential
1229	b4420	chromosome	RNA	antisense_RNA	2	50	1	Neutral	rdlA	sRNA antisense regulator affects LdrA translation; proposed addiction module in LDR-A repeat, with toxic peptide LdrA	---	Not Essential
1230	b4421	chromosome	Protein_Coding	protein_coding	5	40	51	Neutral	ldrB	toxic polypeptide, small	WP_000170963.1	Not Essential
1231	b4422	chromosome	RNA	antisense_RNA	2	50	6	Neutral	rdlB	sRNA antisense regulator affects LdrB translation; proposed addiction module in LDR-B repeat, with toxic peptide LdrB	---	Not Essential
1232	b4423	chromosome	Protein_Coding	protein_coding	5	80	39.75	Neutral	ldrC	toxic polypeptide, small	WP_000170955.1	Not Essential
1233	b4424	chromosome	RNA	antisense_RNA	2	100	3	Neutral	rdlC	sRNA antisense regulator affects LdrC translation; proposed addiction module in LDR-C repeat, with toxic peptide LdrC	---	Not Essential
1234	b1216	chromosome	Protein_Coding	protein_coding	57	56.1	35.25	Neutral	chaA	calcium/sodium:proton antiporter	WP_000063607.1	Not Essential
1235	b1217	chromosome	Protein_Coding	protein_coding	15	80	25.1667	Neutral	chaB	cation transport regulator	WP_001146444.1	Not Essential
1236	b1218	chromosome	Protein_Coding	protein_coding	20	60	34.1667	Neutral	chaC	cation transport regulator	WP_001336325.1	Not Essential
1237	b1219	chromosome	Protein_Coding	protein_coding	12	25	5	Neutral	ychN	putative sulfur relay protein	WP_001169669.1	Not Essential
1238	b1220	chromosome	Protein_Coding	protein_coding	62	58.1	22.8056	Neutral	ychO	putative invasin	WP_000086217.1	Not Essential
1239	b1221	chromosome	Protein_Coding	protein_coding	28	60.7	31.6471	Neutral	narL	response regulator in two-component regulatory system with NarX	WP_000070491.1	Not Essential
1240	b1222	chromosome	Protein_Coding	protein_coding	63	61.9	30.2051	Neutral	narX	sensory histidine kinase in two-component regulatory system with NarL	WP_000918073.1	Not Essential
1241	b1223	chromosome	Protein_Coding	protein_coding	49	57.1	34.75	Neutral	narK	nitrate/nitrite transporter	WP_000019827.1	Not Essential
1242	b1224	chromosome	Protein_Coding	protein_coding	138	68.1	35.4574	Neutral	narG	nitrate reductase 1, alpha subunit	WP_000032939.1	Not Essential
1243	b1225	chromosome	Protein_Coding	protein_coding	55	60	30.4848	Neutral	narH	nitrate reductase 1, beta (Fe-S) subunit	WP_000702650.1	Not Essential
1244	b1226	chromosome	Protein_Coding	protein_coding	18	50	46.1111	Neutral	narJ	molybdenum-cofactor-assembly chaperone delta subunit of nitrate reductase 1	WP_000571681.1	Not Essential
1245	b1227	chromosome	Protein_Coding	protein_coding	25	60	40.2667	Neutral	narI	nitrate reductase 1, gamma (cytochrome b(NR)) subunit	WP_001160108.1	Not Essential
1246	b4425	chromosome	RNA	ncRNA	3	33.3	3	Neutral	rttR	rtT sRNA, processed from tyrT transcript	---	Not Essential
1247	b1230	chromosome	RNA	tRNA	1	100	22	Neutral	tyrV	tRNA-Tyr	---	Not Essential
1248	b1231	chromosome	RNA	tRNA	1	100	16	Neutral	tyrT	tRNA-Tyr	---	Not Essential
1249	b1232	chromosome	Protein_Coding	protein_coding	49	69.4	53.9706	Neutral	purU	formyltetrahydrofolate hydrolase	WP_000555857.1	Not Essential
1250	b1233	chromosome	Protein_Coding	protein_coding	23	73.9	138.176	Neutral	ychJ	UPF0225 family protein	WP_001307143.1	Not Essential
1251	b1234	chromosome	Protein_Coding	protein_coding	38	57.9	38.5909	Neutral	rssA	putative patatin-like family phospholipase	WP_001295622.1	Not Essential
1252	b1235	chromosome	Protein_Coding	protein_coding	45	17.8	26.125	Underrepresented	rssB	PcnB-degradosome interaction factor; response regulator	WP_000193447.1	Not Essential
1253	b1236	chromosome	Protein_Coding	protein_coding	48	0	0	Underrepresented	galU	glucose-1-phosphate uridylyltransferase	WP_000718995.1	Not Essential
1254	b1237	chromosome	Protein_Coding	protein_coding	19	0	0	Underrepresented	hns	global DNA-binding transcriptional dual regulator H-NS	WP_001287378.1	Not Essential
1255	b1238	chromosome	Protein_Coding	protein_coding	46	65.2	33.5667	Neutral	tdk	thymidine kinase/deoxyuridine kinase	WP_000068077.1	Not Essential
1256	b4573	chromosome	Pseudogene	pseudogene	31	48.4	18.0667	Neutral	insZ	---	---	Not Essential
1257	b1241	chromosome	Protein_Coding	protein_coding	113	58.4	30.697	Neutral	adhE	fused acetaldehyde-CoA dehydrogenase/iron-dependent alcohol dehydrogenase/pyruvate-formate lyase deactivase	WP_000301651.1	Not Essential
1258	b1242	chromosome	Protein_Coding	protein_coding	36	52.8	36	Neutral	ychE	UPF0056 family inner membrane protein	WP_000616554.1	Not Essential
1259	b1243	chromosome	Protein_Coding	protein_coding	89	33.7	11.6667	Regional	oppA	oligopeptide ABC transporter periplasmic binding protein	WP_001393463.1	Not Essential
1260	b1244	chromosome	Protein_Coding	protein_coding	66	36.4	12.375	Regional	oppB	oligopeptide ABC transporter permease	WP_000911112.1	Not Essential
1261	b1245	chromosome	Protein_Coding	protein_coding	31	29	18.6667	Regional	oppC	oligopeptide ABC transporter permease	WP_000979661.1	Not Essential
1262	b1246	chromosome	Protein_Coding	protein_coding	36	33.3	10.5833	Regional	oppD	oligopeptide ABC transporter ATPase	WP_000110948.1	Not Essential
1263	b1247	chromosome	Protein_Coding	protein_coding	34	41.2	22.0714	Neutral	oppF	oligopeptide ABC transporter ATPase	WP_000994906.1	Not Essential
1264	b1248	chromosome	Protein_Coding	protein_coding	9	66.7	15	Neutral	yciU	UPF0263 family protein	WP_000366959.1	Not Essential
1265	b1249	chromosome	Protein_Coding	protein_coding	71	32.4	7.65217	Regional	clsA	cardiolipin synthase 1	WP_000214516.1	Not Essential
1266	b4595	chromosome	Protein_Coding	protein_coding	11	72.7	20.125	Neutral	yciY	uncharacterized protein	WP_001309467.1	Not Essential
1267	b1250	chromosome	Protein_Coding	protein_coding	71	40.8	14.2414	Neutral	kch	voltage-gated potassium channel	WP_001295624.1	Not Essential
1268	b1251	chromosome	Protein_Coding	protein_coding	15	60	22.5556	Neutral	yciI	putative DGPF domain-containing enzyme	WP_000967595.1	Not Essential
1269	b1252	chromosome	Protein_Coding	protein_coding	29	13.8	21.75	Underrepresented	tonB	membrane spanning protein in TonB-ExbB-ExbD transport complex	WP_001360141.1	Not Essential
1270	b1253	chromosome	Protein_Coding	protein_coding	22	68.2	39.8	Neutral	yciA	acyl-CoA esterase	WP_000108160.1	Not Essential
1271	b1254	chromosome	Protein_Coding	protein_coding	31	12.9	3.75	Regional	yciB	IspA family inner membrane protein	WP_000808667.1	Not Essential
1272	b1255	chromosome	Protein_Coding	protein_coding	39	56.4	27.9545	Neutral	yciC	UPF0259 family inner membrane protein	WP_000028545.1	Not Essential
1273	b1256	chromosome	Protein_Coding	protein_coding	34	64.7	37.2273	Neutral	ompW	outer membrane protein W	WP_000737226.1	Not Essential
1274	b1257	chromosome	Protein_Coding	protein_coding	30	23.3	4.85714	Underrepresented	yciE	putative rubrerythrin/ferritin-like metal-binding protein	WP_001079505.1	Not Essential
1275	b1258	chromosome	Protein_Coding	protein_coding	24	33.3	19.5	Underrepresented	yciF	putative rubrerythrin/ferritin-like metal-binding protein	WP_001056490.1	Not Essential
1276	b1259	chromosome	Protein_Coding	protein_coding	7	28.6	5	Underrepresented	yciG	KGG family protein	WP_000807651.1	Not Essential
1277	b1260	chromosome	Protein_Coding	protein_coding	24	62.5	38.2667	Neutral	trpA	tryptophan synthase, alpha subunit	WP_000443067.1	Not Essential
1278	b1261	chromosome	Protein_Coding	protein_coding	40	47.5	49.4211	Neutral	trpB	tryptophan synthase, beta subunit	WP_000209520.1	Not Essential
1279	b1262	chromosome	Protein_Coding	protein_coding	53	60.4	42.4062	Neutral	trpC	indole-3-glycerolphosphate synthetase and N-(5-phosphoribosyl)anthranilate isomerase	WP_000983871.1	Not Essential
1280	b1263	chromosome	Protein_Coding	protein_coding	54	61.1	32.8485	Neutral	trpD	fused glutamine amidotransferase (component II) of anthranilate synthase/anthranilate phosphoribosyl transferase	WP_000763511.1	Not Essential
1281	b1264	chromosome	Protein_Coding	protein_coding	53	45.3	34.7083	Neutral	trpE	component I of anthranilate synthase	WP_001194582.1	Not Essential
1282	b1265	chromosome	Protein_Coding	protein_coding	1	0	0	Neutral	trpL	trp operon leader peptide	WP_001700591.1	Not Essential
1283	b1266	chromosome	Protein_Coding	protein_coding	26	65.4	20.1176	Neutral	yciV	PHP domain protein	WP_001285661.1	Not Essential
1284	b1267	chromosome	Protein_Coding	protein_coding	32	53.1	46.5882	Neutral	yciO	putative RNA binding protein	WP_001295575.1	Not Essential
1285	b1268	chromosome	Protein_Coding	protein_coding	107	54.2	27.9483	Neutral	yciQ	enhancer of membrane protein expression; putative inner membrane protein	WP_001326916.1	Not Essential
1286	b1269	chromosome	Protein_Coding	protein_coding	30	36.7	21.1818	Neutral	rluB	23S rRNA pseudouridine(2605) synthase	WP_001291217.1	Not Essential
1287	b1270	chromosome	Protein_Coding	protein_coding	28	67.9	48.2632	Neutral	btuR	cob(I)yrinic acid a,c-diamide adenosyltransferase	WP_001278906.1	Not Essential
1288	b1271	chromosome	Protein_Coding	protein_coding	29	62.1	21.5	Neutral	yciK	putative EmrKY-TolC system oxoacyl-(acyl carrier protein) reductase	WP_000559286.1	Not Essential
1289	b1272	chromosome	Protein_Coding	protein_coding	41	51.2	27.619	Neutral	sohB	inner membrane protein, S49 peptidase family protein	WP_000422045.1	Not Essential
1290	b1273	chromosome	Protein_Coding	protein_coding	10	50	15	Neutral	yciN	DUF2498 protein YciN	WP_001031530.1	Not Essential
1291	b1274	chromosome	Protein_Coding	protein_coding	97	10.3	26	Underrepresented	topA	DNA topoisomerase I, omega subunit	WP_001297122.1	Essential
1292	b1275	chromosome	Protein_Coding	protein_coding	54	14.8	11.5	Underrepresented	cysB	N-acetylserine-responsive cysteine regulon transcriptional activator; autorepressor	WP_000776253.1	Not Essential
1293	b4522	chromosome	Protein_Coding	protein_coding	7	71.4	7	Neutral	ymiA	uncharacterized protein	WP_000908596.1	Not Essential
1294	b4523	chromosome	Protein_Coding	protein_coding	7	57.1	15.25	Neutral	yciX	uncharacterized protein	WP_001297116.1	Not Essential
1295	b1276	chromosome	Protein_Coding	protein_coding	121	38	20.1522	Neutral	acnA	aconitate hydratase 1; aconitase A	WP_000099535.1	Not Essential
1296	b1277	chromosome	Protein_Coding	protein_coding	28	0	0	Underrepresented	ribA	GTP cyclohydrolase II	WP_001176295.1	Essential
1297	b1278	chromosome	Protein_Coding	protein_coding	28	53.6	16.2	Neutral	pgpB	phosphatidylglycerophosphatase B	WP_001256538.1	Not Essential
1298	b1279	chromosome	Protein_Coding	protein_coding	15	33.3	9.6	Regional	yciS	DUF1049 family inner membrane protein, function unknown	WP_000876286.1	Not Essential
1299	b1280	chromosome	Protein_Coding	protein_coding	56	1.8	9	Underrepresented	yciM	LPS regulatory protein; putative modulator of LpxC proteolysis	WP_000891353.1	Not Essential
1300	b1281	chromosome	Protein_Coding	protein_coding	19	52.6	18.4	Neutral	pyrF	orotidine-5'-phosphate decarboxylase	WP_000176270.1	Not Essential
1301	b1282	chromosome	Protein_Coding	protein_coding	16	31.2	27.4	Neutral	yciH	initiation factor function partial mimic, SUI1 family	WP_001295580.1	Not Essential
1302	b1283	chromosome	Protein_Coding	protein_coding	13	38.5	31.2	Neutral	osmB	osmotically and stress inducible lipoprotein	WP_000498253.1	Not Essential
1303	b1284	chromosome	Protein_Coding	protein_coding	29	75.9	22.8182	Neutral	yciT	global regulator of transcription; DeoR family	WP_001088620.1	Not Essential
1304	b4596	chromosome	Protein_Coding	protein_coding	10	90	43.7778	Neutral	yciZ	uncharacterized protein	WP_001288368.1	Not Essential
1305	b1285	chromosome	Protein_Coding	protein_coding	82	51.2	26.8095	Neutral	gmr	cyclic-di-GMP phosphodiesterase; csgD regulator; modulator of RNase II stability	WP_000859945.1	Not Essential
1306	b4672	chromosome	Protein_Coding	protein_coding	9	22.2	4.5	Regional	ymiB	uncharacterized protein	WP_000221855.1	Not Essential
1307	b1286	chromosome	Protein_Coding	protein_coding	56	16.1	21.8889	Underrepresented	rnb	ribonuclease II	WP_000484984.1	Not Essential
1308	b1287	chromosome	Protein_Coding	protein_coding	52	59.6	20.3226	Neutral	yciW	putative oxidoreductase	WP_001335988.1	Not Essential
1309	b1288	chromosome	Protein_Coding	protein_coding	30	0	0	Underrepresented	fabI	enoyl-[acyl-carrier-protein] reductase, NADH-dependent	WP_000506490.1	Essential
1310	b1289	chromosome	Protein_Coding	protein_coding	14	64.3	19.8889	Neutral	ycjD	DUF559 family endonuclease-related protein	WP_000565727.1	Not Essential
1311	b1290	chromosome	Protein_Coding	protein_coding	35	14.3	15.2	Underrepresented	sapF	antimicrobial peptide ABC transporter ATPase	WP_000573407.1	Not Essential
1312	b1291	chromosome	Protein_Coding	protein_coding	37	2.7	1	Underrepresented	sapD	antimicrobial peptide ABC transporter ATPase	WP_001128858.1	Not Essential
1313	b1292	chromosome	Protein_Coding	protein_coding	35	22.9	12.25	Underrepresented	sapC	antimicrobial peptide transport ABC transporter permease	WP_001146163.1	Not Essential
1314	b1293	chromosome	Protein_Coding	protein_coding	41	7.3	4.33333	Underrepresented	sapB	antimicrobial peptide transport ABC transporter permease	WP_000583277.1	Not Essential
1315	b1294	chromosome	Protein_Coding	protein_coding	70	30	14.6667	Regional	sapA	antimicrobial peptide transport ABC transporter periplasmic binding protein	WP_001250216.1	Not Essential
1316	b1295	chromosome	Protein_Coding	protein_coding	11	36.4	7.25	Neutral	ymjA	DUF2543 family protein	WP_001015110.1	Not Essential
1317	b1296	chromosome	Protein_Coding	protein_coding	61	63.9	43.9744	Neutral	puuP	putrescine importer	WP_000996856.1	Not Essential
1318	b1297	chromosome	Protein_Coding	protein_coding	58	58.6	22.5882	Neutral	puuA	glutamate--putrescine ligase	WP_001296746.1	Not Essential
1319	b1298	chromosome	Protein_Coding	protein_coding	32	62.5	39.95	Neutral	puuD	gamma-glutamyl-gamma-aminobutyrate hydrolase	WP_001300506.1	Not Essential
1320	b1299	chromosome	Protein_Coding	protein_coding	26	57.7	30.6	Neutral	puuR	repressor for the divergent puu operons, putrescine inducible	WP_001278727.1	Not Essential
1321	b1300	chromosome	Protein_Coding	protein_coding	41	56.1	21.1304	Neutral	puuC	gamma-glutamyl-gamma-aminobutyraldehyde dehydrogenase; succinate semialdehyde dehydrogenase	WP_001009090.1	Not Essential
1322	b1301	chromosome	Protein_Coding	protein_coding	49	79.6	32.5385	Neutral	puuB	gamma-glutamylputrescine oxidoreductase	WP_000134870.1	Not Essential
1323	b1302	chromosome	Protein_Coding	protein_coding	38	63.2	35.8333	Neutral	puuE	4-aminobutyrate aminotransferase, PLP-dependent	WP_000069229.1	Not Essential
1324	b1303	chromosome	Protein_Coding	protein_coding	33	60.6	23.45	Neutral	pspF	psp operon transcriptional activator	WP_001301108.1	Not Essential
1325	b1304	chromosome	Protein_Coding	protein_coding	14	35.7	14.8	Regional	pspA	regulatory protein for phage-shock-protein operon	WP_000511025.1	Not Essential
1326	b1305	chromosome	Protein_Coding	protein_coding	10	50	15	Neutral	pspB	psp operon transcription co-activator	WP_001274963.1	Not Essential
1327	b1306	chromosome	Protein_Coding	protein_coding	16	62.5	28.9	Neutral	pspC	psp operon transcription co-activator	WP_000907387.1	Not Essential
1328	b1307	chromosome	Protein_Coding	protein_coding	12	50	19.6667	Neutral	pspD	peripheral inner membrane phage-shock protein	WP_001295585.1	Not Essential
1329	b1308	chromosome	Protein_Coding	protein_coding	10	60	15.1667	Neutral	pspE	thiosulfate:cyanide sulfurtransferase (rhodanese)	WP_000473109.1	Not Essential
1330	b1309	chromosome	Protein_Coding	protein_coding	110	26.4	25.2414	Regional	ycjM	alpha amylase catalytic domain family protein	WP_000810499.1	Not Essential
1331	b1310	chromosome	Protein_Coding	protein_coding	58	58.6	29.6176	Neutral	ycjN	putative ABC sugar transporter periplasmic binding protein	WP_000597466.1	Not Essential
1332	b1311	chromosome	Protein_Coding	protein_coding	35	65.7	41	Neutral	ycjO	putative sugar ABC transporter permease	WP_001080790.1	Not Essential
1333	b1312	chromosome	Protein_Coding	protein_coding	28	60.7	45.3529	Neutral	ycjP	putative sugar ABC transporter permease	WP_000224659.1	Not Essential
1334	b1313	chromosome	Protein_Coding	protein_coding	40	47.5	16.7895	Neutral	ycjQ	putative Zn-dependent NAD(P)-binding oxidoreductase	WP_000737347.1	Not Essential
1335	b1314	chromosome	Protein_Coding	protein_coding	37	51.4	29.3158	Neutral	ycjR	putative TIM alpha/beta barrel enzyme	WP_000690229.1	Not Essential
1336	b1315	chromosome	Protein_Coding	protein_coding	35	68.6	47.4583	Neutral	ycjS	putative NADH-binding oxidoreductase	WP_001395397.1	Not Essential
1337	b1316	chromosome	Protein_Coding	protein_coding	79	70.9	32.25	Neutral	ycjT	putative family 65 glycosyl hydrolase	WP_000198036.1	Not Essential
1338	b1317	chromosome	Protein_Coding	protein_coding	20	55	28.7273	Neutral	ycjU	beta-phosphoglucomutase	WP_000775794.1	Not Essential
1339	b4524	chromosome	Pseudogene	pseudogene	46	43.5	43.15	Regional	ycjV	---	---	Not Essential
1340	b1319	chromosome	Protein_Coding	protein_coding	51	49	19.16	Neutral	ompG	outer membrane porin G	WP_000735257.1	Not Essential
1341	b1320	chromosome	Protein_Coding	protein_coding	59	42.4	18.28	Regional	ycjW	LacI family putative transcriptional repressor	WP_000075375.1	Not Essential
1342	b1321	chromosome	Protein_Coding	protein_coding	56	62.5	36.5714	Neutral	ycjX	DUF463 family protein, puatative P-loop NTPase	WP_000825775.1	Not Essential
1343	b1322	chromosome	Protein_Coding	protein_coding	31	48.4	27.4667	Neutral	ycjF	UPF0283 family inner membrane protein	WP_000138728.1	Not Essential
1344	b1323	chromosome	Protein_Coding	protein_coding	58	44.8	22.4231	Neutral	tyrR	aromatic amino acid biosynthesis and transport regulon transcriptional regulator; autorepressor; ATPase; phosphatase	WP_001300658.1	Not Essential
1345	b1324	chromosome	Protein_Coding	protein_coding	17	41.2	16.7143	Neutral	tpx	lipid hydroperoxide peroxidase	WP_000084387.1	Not Essential
1346	b1325	chromosome	Protein_Coding	protein_coding	34	67.6	28.2609	Neutral	ycjG	L-Ala-D/L-Glu epimerase	WP_001261211.1	Not Essential
1347	b1326	chromosome	Protein_Coding	protein_coding	17	47.1	29	Neutral	mpaA	murein peptide amidase A	WP_000219122.1	Not Essential
1348	b4525	chromosome	Pseudogene	pseudogene	8	87.5	9.42857	Neutral	ymjC	---	---	Not Essential
1349	b4673	chromosome	Pseudogene	pseudogene	6	66.7	19	Neutral	ymjD	---	---	Not Essential
1350	b1327	chromosome	Protein_Coding	protein_coding	52	73.1	22.6579	Neutral	ycjY	S9 homolog non-peptidase family protein	WP_001300523.1	Not Essential
1351	b1328	chromosome	Protein_Coding	protein_coding	50	64	30.6875	Neutral	pgrR	murein peptide degradation regulator	WP_000817708.1	Not Essential
1352	b1329	chromosome	Protein_Coding	protein_coding	82	43.9	13.1667	Neutral	mppA	murein tripeptide (L-ala-gamma-D-glutamyl-meso-DAP) transporter subunit	WP_000683020.1	Not Essential
1353	b1330	chromosome	Protein_Coding	protein_coding	71	42.3	26.2	Neutral	ynaI	mechanosensitive channel protein, very small conductance	WP_000559900.1	Not Essential
1354	b1331	chromosome	Protein_Coding	protein_coding	20	95	26.6842	Neutral	insH1	IS5 transposase and trans-activator	WP_010723085.1	Not Essential
1355	b1332	chromosome	Protein_Coding	protein_coding	12	50	51.3333	Neutral	ynaJ	DUF2534 family putative inner membrane protein	WP_000605090.1	Not Essential
1356	b1333	chromosome	Protein_Coding	protein_coding	37	29.7	10.8182	Neutral	uspE	stress-induced protein	WP_001262123.1	Not Essential
1357	b1334	chromosome	Protein_Coding	protein_coding	27	77.8	26.1429	Neutral	fnr	oxygen-sensing anaerobic growth regulon transcriptional regulator FNR; autorepressor	WP_000611911.1	Not Essential
1358	b1335	chromosome	Protein_Coding	protein_coding	21	71.4	21.6	Neutral	ogt	O-6-alkylguanine-DNA:cysteine-protein methyltransferase	WP_000945011.1	Not Essential
1359	b1336	chromosome	Protein_Coding	protein_coding	78	66.7	28.7692	Neutral	abgT	p-aminobenzoyl-glutamate transporter; membrane protein	WP_000062973.1	Not Essential
1360	b1337	chromosome	Protein_Coding	protein_coding	56	62.5	36.8	Neutral	abgB	p-aminobenzoyl-glutamate hydrolase, B subunit	WP_001156451.1	Not Essential
1361	b1338	chromosome	Protein_Coding	protein_coding	39	56.4	32.5	Neutral	abgA	p-aminobenzoyl-glutamate hydrolase, A subunit	WP_000444929.1	Not Essential
1362	b1339	chromosome	Protein_Coding	protein_coding	40	62.5	28.12	Neutral	abgR	putative DNA-binding transcriptional regulator of abgABT operon	WP_000885458.1	Not Essential
1363	b4426	chromosome	RNA	antisense_RNA	5	40	40.5	Neutral	mcaS	motility and biofilm regulator sRNA	---	Not Essential
1364	b1340	chromosome	Protein_Coding	protein_coding	21	47.6	31.6	Neutral	smrA	DNA endonuclease	WP_001046829.1	Not Essential
1365	b1341	chromosome	Protein_Coding	protein_coding	56	58.9	25.1212	Neutral	ydaM	diguanylate cyclase, csgD regulator	WP_000628058.1	Not Essential
1366	b1342	chromosome	Protein_Coding	protein_coding	44	65.9	40.3103	Neutral	ydaN	putative Zn(II) transporter	WP_000387388.1	Not Essential
1367	b4699	chromosome	RNA	antisense_RNA	5	80	19	Neutral	fnrS	FNR-activated anaerobic sRNA antisense regulator down regulates cydDC, metE, sodA, sodB, Hfq-dependent; mediates negative FNR regulation	---	Not Essential
1368	b1343	chromosome	Protein_Coding	protein_coding	48	70.8	30	Neutral	dbpA	ATP-dependent RNA helicase, specific for 23S rRNA	WP_000123737.1	Not Essential
1369	b1344	chromosome	Protein_Coding	protein_coding	37	48.6	26.6667	Neutral	ttcA	tRNA s(2)C32 thioltransferase, iron sulfur cluster protein	WP_001157406.1	Not Essential
1370	b1345	chromosome	Protein_Coding	protein_coding	72	33.3	18.75	Regional	intR	Rac prophage; integrase	WP_000040852.1	Not Essential
1371	b1346	chromosome	Protein_Coding	protein_coding	12	50	8.5	Regional	ydaQ	Rac prophage; conserved protein	WP_000079604.1	Not Essential
1372	b1347	chromosome	Protein_Coding	protein_coding	13	0	0	Underrepresented	ydaC	DUF1187 family protein, Rac prophage; putative double-strand break reduction protein	WP_000276809.1	Not Essential
1373	b4714	chromosome	RNA	other	12	0	0	Underrepresented	ralA	---	---	Not Essential
1374	b1347	chromosome	Protein_Coding	protein_coding	13	0	0	Neutral	ydaC	DUF1187 family protein, Rac prophage; putative double-strand break reduction protein	WP_000276809.1	Not Essential
1375	b1348	chromosome	Protein_Coding	protein_coding	11	18.2	1.5	Underrepresented	ralR	Rac prophage; restriction alleviation protein	WP_001317028.1	Not Essential
1376	b1349	chromosome	Protein_Coding	protein_coding	41	51.2	28.619	Regional	recT	Rac prophage; recombination and repair protein	WP_000166319.1	Not Essential
1377	b1350	chromosome	Protein_Coding	protein_coding	94	48.9	26.1739	Regional	recE	Rac prophage; exonuclease VIII, 5' to 3' specific dsDNA exonuclease	WP_000105143.1	Not Essential
1378	b1351	chromosome	Protein_Coding	protein_coding	13	7.7	11	Underrepresented	racC	Rac prophage; uncharacterized protein	WP_000632297.1	Not Essential
1379	b4526	chromosome	Protein_Coding	protein_coding	7	28.6	19.5	Underrepresented	ydaE	conserved protein, Rac prophage	WP_001352098.1	Not Essential
1380	b1352	chromosome	Protein_Coding	protein_coding	15	60	6.33333	Neutral	kilR	killing protein, Rac prophage; FtsZ inhibitor protein	WP_000560225.1	Not Essential
1381	b1353	chromosome	Protein_Coding	protein_coding	35	20	7.42857	Underrepresented	sieB	phage superinfection exclusion protein, Rac prophage	WP_001312793.1	Not Essential
1382	b4527	chromosome	Protein_Coding	protein_coding	5	40	18	Neutral	ydaF	uncharacterized protein, Rac prophage	WP_001169151.1	Not Essential
1383	b1355	chromosome	Protein_Coding	protein_coding	9	44.4	57	Neutral	ydaG	Rac prophage; uncharacterized protein	WP_000233809.1	Not Essential
1384	b1356	chromosome	Protein_Coding	protein_coding	30	3.3	1	Underrepresented	racR	Rac prophage; putative DNA-binding transcriptional regulator	WP_000948459.1	Not Essential
1385	b1357	chromosome	Protein_Coding	protein_coding	13	0	0	Underrepresented	ydaS	Rac prophage; putative DNA-binding transcriptional regulator	WP_000712069.1	Not Essential
1386	b1358	chromosome	Protein_Coding	protein_coding	12	66.7	14.375	Neutral	ydaT	Rac prophage; uncharacterized protein	WP_000693797.1	Not Essential
1387	b1359	chromosome	Protein_Coding	protein_coding	33	51.5	35.8235	Neutral	ydaU	Rac prophage; conserved protein	WP_000899748.1	Not Essential
1388	b1360	chromosome	Protein_Coding	protein_coding	17	41.2	52.5714	Neutral	ydaV	Rac prophage; putative DNA replication protein	WP_000788970.1	Not Essential
1389	b1361	chromosome	Pseudogene	pseudogene	20	65	32.6923	Neutral	ydaW	---	---	Not Essential
1390	b1362	chromosome	Pseudogene	pseudogene	15	66.7	28.4	Neutral	rzpR	---	---	Not Essential
1391	b1363	chromosome	Protein_Coding	protein_coding	117	18.8	9	Regional	trkG	Rac prophage; potassium transporter subunit	WP_001097895.1	Not Essential
1392	b1365	chromosome	Protein_Coding	protein_coding	13	46.2	26.5	Neutral	ynaK	Rac prophage; conserved protein	WP_001350510.1	Not Essential
1393	b1366	chromosome	Pseudogene	pseudogene	19	57.9	19.3636	Neutral	ydaY	---	---	Not Essential
1394	b1368	chromosome	Pseudogene	pseudogene	36	38.9	27.3571	Regional	tmpR	---	---	Not Essential
1395	b4570	chromosome	Pseudogene	pseudogene	27	70.4	30	Neutral	lomR	---	---	Not Essential
1396	b1370	chromosome	Protein_Coding	protein_coding	20	65	28.9231	Neutral	insH1	IS5 transposase and trans-activator	WP_000019448.1	Not Essential
1397	b4570	chromosome	Pseudogene	pseudogene	27	70.4	30	Neutral	lomR	---	---	Not Essential
1398	b1372	chromosome	Protein_Coding	protein_coding	125	66.4	37.4337	Neutral	stfR	Rac prophage; putative tail fiber protein	WP_000279097.1	Not Essential
1399	b1373	chromosome	Protein_Coding	protein_coding	26	53.8	14.1429	Neutral	tfaR	Rac prophage; putative tail fiber assembly protein	WP_001698950.1	Not Essential
1400	b1374	chromosome	Protein_Coding	protein_coding	24	50	13.5	Neutral	pinR	Rac prophage; putative site-specific recombinase	WP_000086527.1	Not Essential
1401	b1375	chromosome	Protein_Coding	protein_coding	18	16.7	6.66667	Underrepresented	ynaE	cold shock protein, Rac prophage	WP_000836770.1	Not Essential
1402	b4638	chromosome	Pseudogene	pseudogene	3	33.3	1	Neutral	ttcC	---	---	Not Essential
1403	b1376	chromosome	Protein_Coding	protein_coding	18	66.7	20.5	Neutral	uspF	stress-induced protein, ATP-binding protein	WP_001300461.1	Not Essential
1404	b1377	chromosome	Protein_Coding	protein_coding	66	47	35.4839	Neutral	ompN	outer membrane pore protein N, non-specific	WP_000837921.1	Not Essential
1405	b4427	chromosome	RNA	antisense_RNA	6	16.7	7	Underrepresented	micC	sRNA antisense regulator of OmpC translation, Hfq-dependent	---	Not Essential
1406	b1378	chromosome	Protein_Coding	protein_coding	128	55.5	27.9577	Neutral	pfo	pyruvate-flavodoxin oxidoreductase	WP_000628244.1	Not Essential
1407	b4529	chromosome	Protein_Coding	protein_coding	11	45.5	55.8	Neutral	ydbJ	DUF333 family putative lipoprotein	WP_001295715.1	Not Essential
1408	b1379	chromosome	Protein_Coding	protein_coding	23	56.5	27.5385	Neutral	hslJ	heat-inducible lipoprotein involved in novobiocin resistance	WP_001298828.1	Not Essential
1409	b1380	chromosome	Protein_Coding	protein_coding	42	61.9	27.0385	Neutral	ldhA	fermentative D-lactate dehydrogenase, NAD-dependent	WP_000762236.1	Not Essential
1410	b1381	chromosome	Protein_Coding	protein_coding	112	47.3	19.9623	Neutral	ydbH	putative membrane-anchored protein, function unknown	WP_000900941.1	Not Essential
1411	b1382	chromosome	Protein_Coding	protein_coding	8	75	16.6667	Neutral	ynbE	lipoprotein	WP_000698145.1	Not Essential
1412	b1383	chromosome	Protein_Coding	protein_coding	20	55	15.1818	Neutral	ydbL	DUF1318 family protein	WP_001300734.1	Not Essential
1413	b1384	chromosome	Protein_Coding	protein_coding	46	45.7	24.7143	Neutral	feaR	transcriptional activator for tynA and feaB	WP_001067514.1	Not Essential
1414	b1385	chromosome	Protein_Coding	protein_coding	61	57.4	46.4	Neutral	feaB	phenylacetaldehyde dehydrogenase	WP_000138615.1	Not Essential
1415	b1386	chromosome	Protein_Coding	protein_coding	114	56.1	31.2031	Neutral	tynA	tyramine oxidase, copper-requiring	WP_000535469.1	Not Essential
1416	b1387	chromosome	Protein_Coding	protein_coding	74	58.1	28.8372	Neutral	paaZ	oxepin-CoA hydrolase and 3-oxo-5,6-dehydrosuberyl-CoA semialdehyde dehydrogenase	WP_001186469.1	Not Essential
1417	b1388	chromosome	Protein_Coding	protein_coding	33	63.6	21.4762	Neutral	paaA	ring 1,2-phenylacetyl-CoA epoxidase subunit	WP_000191077.1	Not Essential
1418	b1389	chromosome	Protein_Coding	protein_coding	10	60	26.5	Neutral	paaB	putative ring 1,2-phenylacetyl-CoA epoxidase subunit	WP_000073393.1	Not Essential
1419	b1390	chromosome	Protein_Coding	protein_coding	27	59.3	36.3125	Neutral	paaC	ring 1,2-phenylacetyl-CoA epoxidase subunit	WP_001072837.1	Not Essential
1420	b1391	chromosome	Protein_Coding	protein_coding	18	77.8	29.2143	Neutral	paaD	ring 1,2-phenylacetyl-CoA epoxidase subunit	WP_001189201.1	Not Essential
1421	b1392	chromosome	Protein_Coding	protein_coding	37	54.1	30.8	Neutral	paaE	ring 1,2-phenylacetyl-CoA epoxidase, NAD(P)H oxidoreductase component	WP_000206388.1	Not Essential
1422	b1393	chromosome	Protein_Coding	protein_coding	31	61.3	40.7895	Neutral	paaF	2,3-dehydroadipyl-CoA hydratase	WP_001292353.1	Not Essential
1423	b1394	chromosome	Protein_Coding	protein_coding	29	79.3	16.6087	Neutral	paaG	1,2-epoxyphenylacetyl-CoA isomerase, oxepin-CoA-forming	WP_000969784.1	Not Essential
1424	b1395	chromosome	Protein_Coding	protein_coding	44	56.8	20.72	Neutral	paaH	3-hydroxyadipyl-CoA dehydrogenase, NAD+-dependent	WP_000973360.1	Not Essential
1425	b1396	chromosome	Protein_Coding	protein_coding	15	73.3	39.3636	Neutral	paaI	hydroxyphenylacetyl-CoA thioesterase	WP_000018413.1	Not Essential
1426	b1397	chromosome	Protein_Coding	protein_coding	38	47.4	21.2778	Neutral	paaJ	3-oxoadipyl-CoA/3-oxo-5,6-dehydrosuberyl-CoA thiolase	WP_001206197.1	Not Essential
1427	b1398	chromosome	Protein_Coding	protein_coding	48	68.8	29.1818	Neutral	paaK	phenylacetyl-CoA ligase	WP_000632280.1	Not Essential
1428	b1399	chromosome	Protein_Coding	protein_coding	38	47.4	24.5556	Neutral	paaX	transcriptional repressor of phenylacetic acid degradation paa operon, phenylacetyl-CoA inducer	WP_000039887.1	Not Essential
1429	b1400	chromosome	Protein_Coding	protein_coding	24	54.2	19.0769	Neutral	paaY	thioesterase required for phenylacetic acid degradation; trimeric; phenylacetate regulatory and detoxification protein; hexapeptide repeat protein	WP_001123464.1	Not Essential
1430	b4674	chromosome	Protein_Coding	protein_coding	13	0	0	Underrepresented	ynbG	uncharacterized protein	WP_010723099.1	Not Essential
1431	b4492	chromosome	Pseudogene	pseudogene	120	50.8	25.6393	Neutral	ydbA	---	---	Not Essential
1432	b1402	chromosome	Protein_Coding	protein_coding	37	78.4	33.5862	Neutral	insD1	IS2 transposase TnpB	WP_000376502.1	Not Essential
1433	b1403	chromosome	Protein_Coding	protein_coding	9	100	12.2222	Neutral	insC1	IS2 repressor TnpA	WP_000567766.1	Not Essential
1434	b1404	chromosome	Protein_Coding	protein_coding	61	86.9	24.3962	Neutral	insI1	IS30 transposase	WP_001254932.1	Not Essential
1435	b1406	chromosome	Protein_Coding	protein_coding	31	58.1	17.1667	Neutral	ydbC	putative NAD(P)-binding oxidoreductase	WP_000097801.1	Not Essential
1436	b1407	chromosome	Protein_Coding	protein_coding	130	38.5	21.06	Regional	ydbD	PF10971 family putative periplasmic methylglyoxal resistance protein	WP_000910026.1	Not Essential
1437	b1408	chromosome	Protein_Coding	protein_coding	32	46.9	19	Neutral	ynbA	inner membrane protein	WP_000177515.1	Not Essential
1438	b1409	chromosome	Protein_Coding	protein_coding	61	23	11.5	Regional	ynbB	putative CDP-diglyceride synthase	WP_000890941.1	Not Essential
1439	b1410	chromosome	Protein_Coding	protein_coding	78	48.7	21.7368	Neutral	ynbC	putative esterase	WP_000431845.1	Not Essential
1440	b1411	chromosome	Protein_Coding	protein_coding	62	62.9	36.4872	Neutral	ynbD	putative phosphatase inner membrane protein	WP_001375099.1	Not Essential
1441	b1412	chromosome	Protein_Coding	protein_coding	24	54.2	21.3846	Neutral	azoR	NADH-azoreductase, FMN-dependent	WP_000048950.1	Not Essential
1442	b1413	chromosome	Protein_Coding	protein_coding	141	51.1	25.1111	Neutral	hrpA	putative ATP-dependent helicase	WP_000139543.1	Not Essential
1443	b1414	chromosome	Protein_Coding	protein_coding	40	55	33.8182	Neutral	ydcF	DUF218 superfamily protein, SAM-binding	WP_001027942.1	Not Essential
1444	b1415	chromosome	Protein_Coding	protein_coding	61	60.7	34.0541	Neutral	aldA	aldehyde dehydrogenase A, NAD-linked	WP_000115943.1	Not Essential
1445	b4493	chromosome	Pseudogene	pseudogene	46	58.7	20.963	Neutral	gapC	---	---	Not Essential
1446	b1418	chromosome	Protein_Coding	protein_coding	24	70.8	35.8235	Neutral	cybB	cytochrome b561	WP_000428998.1	Not Essential
1447	b4597	chromosome	RNA	antisense_RNA	5	100	13.4	Neutral	rydC	sRNA antisense regulator of csgD and yejABEF, Hfq-dependent	---	Not Essential
1448	b1419	chromosome	Protein_Coding	protein_coding	8	62.5	20.6	Neutral	ydcA	putative periplasmic protein	WP_000731833.1	Not Essential
1449	b4428	chromosome	Protein_Coding	protein_coding	6	83.3	15	Neutral	hokB	toxic polypeptide, small	WP_001320773.1	Not Essential
1450	b1420	chromosome	Protein_Coding	protein_coding	2	50	3	Neutral	mokB	regulatory peptide	WP_001307189.1	Not Essential
1451	b4429	chromosome	RNA	antisense_RNA	3	33.3	8	Neutral	sokB	sRNA antisense regulator blocking mokB, and hence hokB, translation	---	Not Essential
1452	b1421	chromosome	Protein_Coding	protein_coding	61	67.2	33.878	Neutral	trg	methyl-accepting chemotaxis protein III, ribose and galactose sensor receptor	WP_001098559.1	Not Essential
1453	b1422	chromosome	Protein_Coding	protein_coding	42	59.5	28.72	Neutral	ydcI	putative DNA-binding transcriptional regulator	WP_000414567.1	Not Essential
1454	b1423	chromosome	Protein_Coding	protein_coding	44	54.5	16.375	Neutral	ydcJ	putative metalloenzyme	WP_000013789.1	Not Essential
1455	b1424	chromosome	Protein_Coding	protein_coding	79	60.8	28.1875	Neutral	opgD	OPG biosynthetic periplasmic protein	WP_000375961.1	Not Essential
1456	b1426	chromosome	Protein_Coding	protein_coding	10	40	2.5	Neutral	ydcH	DUF465 family protein	WP_001296778.1	Not Essential
1457	b1427	chromosome	Protein_Coding	protein_coding	27	44.4	12.9167	Neutral	rimL	ribosomal-protein-L7/L12-serine acetyltransferase	WP_000140873.1	Not Essential
1458	b1428	chromosome	Protein_Coding	protein_coding	56	53.6	24.0667	Neutral	ydcK	uncharacterized protein	WP_001234042.1	Not Essential
1459	b1429	chromosome	Protein_Coding	protein_coding	37	59.5	18.4091	Neutral	tehA	potassium-tellurite ethidium and proflavin transporter	WP_001301046.1	Not Essential
1460	b1430	chromosome	Protein_Coding	protein_coding	35	57.1	15.55	Neutral	tehB	tellurite, selenium methyltransferase, SAM-dependent; tellurite, selenium resistance protein	WP_000586732.1	Not Essential
1461	b1431	chromosome	Protein_Coding	protein_coding	45	53.3	13.4167	Neutral	ydcL	lipoprotein	WP_001261013.1	Not Essential
1462	b4578	chromosome	Pseudogene	pseudogene	21	71.4	21.4	Neutral	insP	---	---	Not Essential
1463	b1432	chromosome	Protein_Coding	protein_coding	38	50	41.6316	Neutral	insQ	IS609 transposase B	WP_001251043.1	Not Essential
1464	b1433	chromosome	Protein_Coding	protein_coding	53	58.5	23.871	Neutral	ydcO	BenE family inner membrane putative transporter	WP_001236265.1	Not Essential
1465	b1434	chromosome	Protein_Coding	protein_coding	21	61.9	45.6154	Neutral	ydcN	putative DNA-binding transcriptional regulator	WP_000429155.1	Not Essential
1466	b1435	chromosome	Protein_Coding	protein_coding	74	50	20.8108	Neutral	ydcP	putative peptidase	WP_001303492.1	Not Essential
1467	b1436	chromosome	Protein_Coding	protein_coding	6	33.3	56	Neutral	yncJ	uncharacterized protein	WP_000494244.1	Not Essential
1468	b4532	chromosome	Protein_Coding	protein_coding	4	75	11.3333	Neutral	hicA	mRNA interferase toxin of the HicAB toxin-antitoxin system	WP_000813794.1	Not Essential
1469	b1438	chromosome	Protein_Coding	protein_coding	25	32	5.875	Regional	hicB	antitoxin for the HicAB toxin-antitoxin system	WP_001270286.1	Not Essential
1470	b1439	chromosome	Protein_Coding	protein_coding	62	67.7	30.5952	Neutral	ydcR	putative DNA-binding transcriptional regulator and putative aminotransferase	WP_000760626.1	Not Essential
1471	b1440	chromosome	Protein_Coding	protein_coding	53	50.9	23.4444	Neutral	ydcS	putative ABC transporter periplasmic binding protein	WP_000047424.1	Not Essential
1472	b1441	chromosome	Protein_Coding	protein_coding	30	70	30.8095	Neutral	ydcT	putative ABC transporter ATPase	WP_000220396.1	Not Essential
1473	b1442	chromosome	Protein_Coding	protein_coding	44	68.2	26.1667	Neutral	ydcU	putative ABC transporter permease	WP_001251304.1	Not Essential
1474	b1443	chromosome	Protein_Coding	protein_coding	30	73.3	26.3182	Neutral	ydcV	putative ABC transporter permease	WP_000555458.1	Not Essential
1475	b1444	chromosome	Protein_Coding	protein_coding	58	58.6	20.0294	Neutral	patD	gamma-aminobutyraldehyde dehydrogenase	WP_001163872.1	Not Essential
1476	b4598	chromosome	Protein_Coding	protein_coding	8	75	12.8333	Neutral	yncL	stress-induced small inner membrane enterobacterial protein	WP_001310798.1	Not Essential
1477	b1445	chromosome	Protein_Coding	protein_coding	7	28.6	8.5	Neutral	ydcX	DUF2566 family protein	WP_000061178.1	Not Essential
1478	b1446	chromosome	Protein_Coding	protein_coding	8	100	32.25	Neutral	ydcY	DUF2526 family protein	WP_000018633.1	Not Essential
1479	b1447	chromosome	Protein_Coding	protein_coding	16	62.5	40.6	Neutral	ydcZ	DUF606 family inner membrane protein	WP_001076535.1	Not Essential
1480	b1448	chromosome	Protein_Coding	protein_coding	18	55.6	21.2	Neutral	mnaT	methionine N-acyltransferase; L-amino acid N-acyltransferase	WP_001310799.1	Not Essential
1481	b1449	chromosome	Protein_Coding	protein_coding	53	62.3	37.4848	Neutral	curA	curcumin/dihydrocurcumin reductase, NADPH-dependent	WP_000531462.1	Not Essential
1482	b1450	chromosome	Protein_Coding	protein_coding	39	23.1	13.2222	Regional	mcbR	colanic acid and biofilm gene transcriptional regulator, MqsR-controlled	WP_001300742.1	Not Essential
1483	b1451	chromosome	Protein_Coding	protein_coding	106	57.5	26.7049	Neutral	yncD	putative iron outer membrane transporter	WP_000689363.1	Not Essential
1484	b1452	chromosome	Protein_Coding	protein_coding	53	58.5	44.3226	Neutral	yncE	ATP-binding protein, periplasmic, function unknown	WP_000550695.1	Not Essential
1485	b1453	chromosome	Protein_Coding	protein_coding	63	68.3	34.7442	Neutral	ansP	L-asparagine transporter	WP_001300590.1	Not Essential
1486	b1454	chromosome	Protein_Coding	protein_coding	30	53.3	35.4375	Neutral	yncG	glutathione S-transferase homolog	WP_000598857.1	Not Essential
1487	b1455	chromosome	Protein_Coding	protein_coding	20	0	0	Underrepresented	yncH	IPR020099 family protein	WP_000226995.1	Not Essential
1488	b1456	chromosome	Pseudogene	pseudogene	84	64.3	37.8333	Neutral	rhsE	---	---	Not Essential
1489	b1457	chromosome	Protein_Coding	protein_coding	54	1.9	1	Underrepresented	ydcD	putative immunity protein for RhsE	WP_000939263.1	Not Essential
1490	b1459	chromosome	Pseudogene	pseudogene	66	15.2	10.1	Underrepresented	yncI	---	---	Not Essential
1491	b1460	chromosome	Protein_Coding	protein_coding	63	44.4	10.25	Regional	ydcC	H repeat-associated putative transposase	WP_000421020.1	Not Essential
1492	b1461	chromosome	Protein_Coding	protein_coding	12	50	25.5	Neutral	pptA	4-oxalocrotonate tautomerase	WP_001120143.1	Not Essential
1493	b1462	chromosome	Protein_Coding	protein_coding	26	65.4	17.2353	Neutral	yddH	flavin reductase like-protein	WP_000085899.1	Not Essential
1494	b1463	chromosome	Protein_Coding	protein_coding	30	53.3	21.0625	Neutral	nhoA	N-hydroxyarylamine O-acetyltransferase	WP_000187925.1	Not Essential
1495	b1464	chromosome	Protein_Coding	protein_coding	28	57.1	51.8125	Neutral	yddE	PhzC-PhzF family protein	WP_000804385.1	Not Essential
1496	b1465	chromosome	Protein_Coding	protein_coding	26	61.5	30.8125	Neutral	narV	nitrate reductase 2 (NRZ), gamma subunit	WP_000617115.1	Not Essential
1497	b1466	chromosome	Protein_Coding	protein_coding	20	60	36.25	Neutral	narW	nitrate reductase 2 (NRZ), delta subunit (assembly subunit)	WP_001166353.1	Not Essential
1498	b1467	chromosome	Protein_Coding	protein_coding	53	60.4	40.9062	Neutral	narY	nitrate reductase 2 (NRZ), beta subunit	WP_000702535.1	Not Essential
1499	b1468	chromosome	Protein_Coding	protein_coding	147	59.2	35.3218	Neutral	narZ	nitrate reductase 2 (NRZ), alpha subunit	WP_000040458.1	Not Essential
1500	b1469	chromosome	Protein_Coding	protein_coding	71	38	19.5926	Regional	narU	nitrate/nitrite transporter	WP_001207901.1	Not Essential
1501	b1471	chromosome	Pseudogene	pseudogene	130	13.8	8.77778	Underrepresented	yddK	---	---	Not Essential
1502	b1472	chromosome	Pseudogene	pseudogene	22	9.1	13	Underrepresented	yddL	---	---	Not Essential
1503	b1473	chromosome	Protein_Coding	protein_coding	52	42.3	20.0455	Regional	yddG	aromatic amino acid exporter	WP_000198205.1	Not Essential
1504	b1474	chromosome	Protein_Coding	protein_coding	122	54.1	32.0758	Neutral	fdnG	formate dehydrogenase-N, alpha subunit, nitrate-inducible	WP_010723100.1	Not Essential
1505	b1475	chromosome	Protein_Coding	protein_coding	33	54.5	32.7222	Neutral	fdnH	formate dehydrogenase-N, Fe-S (beta) subunit, nitrate-inducible	WP_001240582.1	Not Essential
1506	b1476	chromosome	Protein_Coding	protein_coding	23	78.3	65.3333	Neutral	fdnI	formate dehydrogenase-N, cytochrome B556 (gamma) subunit, nitrate-inducible	WP_000045648.1	Not Essential
1507	b1477	chromosome	Protein_Coding	protein_coding	6	33.3	67	Neutral	yddM	putative DNA-binding transcriptional regulator	WP_000781370.1	Not Essential
1508	b1478	chromosome	Protein_Coding	protein_coding	42	69	45.7586	Neutral	adhP	ethanol-active dehydrogenase/acetaldehyde-active reductase	WP_000642433.1	Not Essential
1509	b1479	chromosome	Protein_Coding	protein_coding	71	47.9	29.6765	Neutral	maeA	malate dehydrogenase, decarboxylating, NAD-requiring; malic enzyme	WP_000433476.1	Not Essential
1510	b1480	chromosome	Protein_Coding	protein_coding	9	33.3	18.6667	Neutral	sra	stationary-phase-induced ribosome-associated protein	WP_000841554.1	Not Essential
1511	b1481	chromosome	Protein_Coding	protein_coding	11	72.7	10.375	Neutral	bdm	biofilm-dependent modulation protein	WP_000495771.1	Not Essential
1512	b1482	chromosome	Protein_Coding	protein_coding	16	62.5	9	Neutral	osmC	lipoyl-dependent Cys-based peroxidase, hydroperoxide resistance; salt-shock inducible membrane protein; peroxiredoxin	WP_000152305.1	Not Essential
1513	b1483	chromosome	Protein_Coding	protein_coding	42	66.7	53.9286	Neutral	ddpF	D,D-dipeptide ABC transporter ATPase	WP_001285536.1	Not Essential
1514	b1484	chromosome	Protein_Coding	protein_coding	36	61.1	39.1818	Neutral	ddpD	D,D-dipeptide ABC transporter ATPase	WP_000193547.1	Not Essential
1515	b1485	chromosome	Protein_Coding	protein_coding	40	70	51.6429	Neutral	ddpC	D,D-dipeptide ABC transporter permease	WP_000979626.1	Not Essential
1516	b1486	chromosome	Protein_Coding	protein_coding	39	53.8	23.1429	Neutral	ddpB	D,D-dipeptide ABC transporter permease	WP_000145123.1	Not Essential
1517	b1487	chromosome	Protein_Coding	protein_coding	69	49.3	33.2941	Neutral	ddpA	D,D-dipeptide ABC transporter periplasmic binding protein	WP_000830550.1	Not Essential
1518	b1488	chromosome	Protein_Coding	protein_coding	26	57.7	28	Neutral	ddpX	D-ala-D-ala dipeptidase, Zn-dependent	WP_001285833.1	Not Essential
1519	b1489	chromosome	Protein_Coding	protein_coding	96	50	22.25	Neutral	dosP	oxygen sensor, c-di-GMP phosphodiesterase, heme-regulated; cold- and stationary phase-induced bioflim regulator	WP_001360132.1	Not Essential
1520	b1490	chromosome	Protein_Coding	protein_coding	83	44.6	16.8378	Regional	dosC	diguanylate cyclase, cold- and stationary phase-induced oxygen-dependent biofilm regulator	WP_000426292.1	Not Essential
1521	b1491	chromosome	Protein_Coding	protein_coding	68	57.4	16.9744	Neutral	yddW	liprotein, glycosyl hydrolase homolog	WP_000350395.1	Not Essential
1522	b1492	chromosome	Protein_Coding	protein_coding	83	73.5	33.4262	Neutral	gadC	glutamate:gamma-aminobutyric acid antiporter	WP_000246019.1	Not Essential
1523	b1493	chromosome	Protein_Coding	protein_coding	51	66.7	35.9706	Neutral	gadB	glutamate decarboxylase B, PLP-dependent	WP_000358930.1	Not Essential
1524	b1494	chromosome	Protein_Coding	protein_coding	149	49.7	21.6081	Neutral	pqqL	putative periplasmic M16 family zinc metalloendopeptidase	WP_010723101.1	Not Essential
1525	b1495	chromosome	Protein_Coding	protein_coding	166	53	18.25	Regional	yddB	putative TonB-dependent outer membrane receptor	WP_000832437.1	Not Essential
1526	b1496	chromosome	Protein_Coding	protein_coding	119	26.9	13.125	Regional	yddA	putative multidrug ABC transporter permease/ATPase	WP_000628576.1	Not Essential
1527	b1497	chromosome	Protein_Coding	protein_coding	80	21.2	11.8235	Underrepresented	ydeM	putative YdeN-specific sulfatase-maturating enzyme	WP_001301030.1	Not Essential
1528	b1498	chromosome	Protein_Coding	protein_coding	107	43	12.5217	Neutral	ydeN	putative Ser-type periplasmic non-aryl sulfatase	WP_001295684.1	Not Essential
1529	b1499	chromosome	Protein_Coding	protein_coding	48	4.2	5.5	Underrepresented	ydeO	UV-inducible global regulator, EvgA-, GadE-dependent	WP_000060495.1	Not Essential
1530	b1500	chromosome	Protein_Coding	protein_coding	10	0	0	Underrepresented	safA	two-component system connector membrane protein, EvgSA to PhoQP	WP_000543384.1	Not Essential
1531	b1501	chromosome	Protein_Coding	protein_coding	113	55.8	25.7302	Neutral	ydeP	putative oxidoreductase	WP_000726691.1	Not Essential
1532	b1502	chromosome	Protein_Coding	protein_coding	68	30.9	6.80952	Underrepresented	ydeQ	putative fimbrial-like adhesin protein	WP_000520676.1	Not Essential
1533	b1503	chromosome	Protein_Coding	protein_coding	31	38.7	15.6667	Regional	ydeR	putative fimbrial-like adhesin protein	WP_000825452.1	Not Essential
1534	b1504	chromosome	Protein_Coding	protein_coding	33	30.3	3.2	Underrepresented	ydeS	putative fimbrial-like adhesin protein	WP_000876763.1	Not Essential
1535	b1505	chromosome	Pseudogene	pseudogene	82	28	13.1739	Underrepresented	ydeT	---	---	Not Essential
1536	b1506	chromosome	Pseudogene	pseudogene	11	45.5	6.4	Regional	yneL	---	---	Not Essential
1537	b1507	chromosome	Protein_Coding	protein_coding	61	36.1	23.4545	Neutral	hipA	inactivating GltX kinase facilitating persister formation; toxin of HipAB TA pair; autokinase	WP_001125439.1	Not Essential
1538	b1508	chromosome	Protein_Coding	protein_coding	9	11.1	10	Underrepresented	hipB	antitoxin of HipAB toxin-antitoxin system	WP_001301023.1	Not Essential
1539	b4696	chromosome	Pseudogene	pseudogene	303	55.4	27.7381	Neutral	yneO	---	---	Not Essential
1540	b1511	chromosome	Protein_Coding	protein_coding	65	52.3	23.7647	Neutral	lsrK	autoinducer-2 (AI-2) kinase	WP_000113108.1	Not Essential
1541	b1512	chromosome	Protein_Coding	protein_coding	40	62.5	33.2	Neutral	lsrR	lsr operon transcriptional repressor	WP_000154342.1	Not Essential
1542	b1513	chromosome	Protein_Coding	protein_coding	62	62.9	16.7436	Neutral	lsrA	autoinducer 2 import ATP-binding protein	WP_001194860.1	Not Essential
1543	b1514	chromosome	Protein_Coding	protein_coding	39	48.7	42.5263	Neutral	lsrC	autoinducer 2 import system permease protein	WP_000911184.1	Not Essential
1544	b1515	chromosome	Protein_Coding	protein_coding	50	66	24.2424	Neutral	lsrD	autoinducer 2 import system permease protein	WP_001222721.1	Not Essential
1545	b1516	chromosome	Protein_Coding	protein_coding	52	67.3	31.5143	Neutral	lsrB	autoinducer 2-binding protein	WP_000172465.1	Not Essential
1546	b1517	chromosome	Protein_Coding	protein_coding	49	49	14.5	Neutral	lsrF	putative autoinducer-2 (AI-2) aldolase	WP_000774165.1	Not Essential
1547	b1518	chromosome	Protein_Coding	protein_coding	13	15.4	2.5	Underrepresented	lsrG	autoinducer-2 (AI-2) degrading protein LsrG	WP_000558527.1	Not Essential
1548	b1519	chromosome	Protein_Coding	protein_coding	31	61.3	31.6316	Neutral	tam	trans-aconitate methyltransferase	WP_001286597.1	Not Essential
1549	b1520	chromosome	Protein_Coding	protein_coding	44	50	24.8636	Neutral	yneE	bestrophin family putative inner membrane protein	WP_001313828.1	Not Essential
1550	b1521	chromosome	Protein_Coding	protein_coding	56	58.9	27.7576	Neutral	uxaB	altronate oxidoreductase, NAD-dependent	WP_000854633.1	Not Essential
1551	b1522	chromosome	Protein_Coding	protein_coding	43	58.1	40.2	Neutral	yneF	putative membrane-bound diguanylate cyclase	WP_000878968.1	Not Essential
1552	b1523	chromosome	Protein_Coding	protein_coding	15	40	40	Neutral	yneG	DUF4186 family protein	WP_001191027.1	Not Essential
1553	b1524	chromosome	Protein_Coding	protein_coding	41	65.9	28.3704	Neutral	glsB	glutaminase 2	WP_000257409.1	Not Essential
1554	b1525	chromosome	Protein_Coding	protein_coding	49	53.1	37.3846	Neutral	sad	succinate semialdehyde dehydrogenase, NAD(P)+-dependent	WP_000156615.1	Not Essential
1555	b1526	chromosome	Protein_Coding	protein_coding	34	55.9	21.8421	Neutral	yneJ	putative DNA-binding transcriptional regulator	WP_000366501.1	Not Essential
1556	b1527	chromosome	Protein_Coding	protein_coding	76	11.8	15.4444	Underrepresented	yneK	uncharacterized protein	WP_000258599.1	Not Essential
1557	b1528	chromosome	Protein_Coding	protein_coding	57	63.2	29.3611	Neutral	ydeA	arabinose efflux transporter, arabinose-inducible	WP_000210799.1	Not Essential
1558	b1529	chromosome	Protein_Coding	protein_coding	31	67.7	32.2857	Neutral	marC	UPF0056 family inner membrane protein	WP_000885033.1	Not Essential
1559	b1530	chromosome	Protein_Coding	protein_coding	25	28	20.1429	Underrepresented	marR	transcriptional repressor of multiple antibiotic resistance	WP_000843414.1	Not Essential
1560	b1531	chromosome	Protein_Coding	protein_coding	21	100	40.9524	Neutral	marA	multiple antibiotic resistance transcriptional regulator	WP_000091199.1	Not Essential
1561	b1532	chromosome	Protein_Coding	protein_coding	11	63.6	40.4286	Neutral	marB	periplasmic mar operon regulator	WP_000803657.1	Not Essential
1562	b1533	chromosome	Protein_Coding	protein_coding	46	60.9	22.6071	Neutral	eamA	cysteine and O-acetyl-L-serine efflux system	WP_000087187.1	Not Essential
1563	b1534	chromosome	Protein_Coding	protein_coding	58	60.3	16.6	Neutral	ydeE	putative transporter	WP_001054204.1	Not Essential
1564	b4599	chromosome	Protein_Coding	protein_coding	8	25	16	Neutral	yneM	inner membrane-associated protein	WP_000901367.1	Not Essential
1565	b4698	chromosome	RNA	antisense_RNA	5	0	0	Neutral	mgrR	sRNA antisense regulator down regulates YgdQ and EptB, PhoPQ-regulated, Hfq-dependent; affects sensitivity to antimicrobial peptides	---	Not Essential
1566	b1535	chromosome	Protein_Coding	protein_coding	52	50	18.8846	Neutral	dgcZ	diguanylate cyclase, zinc-sensing	WP_000592814.1	Not Essential
1567	b1536	chromosome	Protein_Coding	protein_coding	16	18.8	12.3333	Underrepresented	ydeI	hydrogen peroxide resistance OB fold protein; putative periplasmic protein	WP_000671737.1	Not Essential
1568	b1537	chromosome	Protein_Coding	protein_coding	35	45.7	32.0625	Neutral	ydeJ	inactive PncC family protein	WP_001024746.1	Not Essential
1569	b1538	chromosome	Protein_Coding	protein_coding	88	46.6	15.7073	Neutral	dcp	dipeptidyl carboxypeptidase II	WP_000210373.1	Not Essential
1570	b1539	chromosome	Protein_Coding	protein_coding	43	58.1	35.56	Neutral	ydfG	NADP-dependent 3-hydroxy acid dehydrogenase; malonic semialdehyde reductase	WP_000636571.1	Not Essential
1571	b1540	chromosome	Protein_Coding	protein_coding	17	52.9	20.6667	Neutral	rspR	transcriptional repressor for rspAB	WP_000215549.1	Not Essential
1572	b1541	chromosome	Protein_Coding	protein_coding	8	50	18	Neutral	ydfZ	selenoprotein, function unknown	WP_000214712.1	Not Essential
1573	b1542	chromosome	Protein_Coding	protein_coding	67	52.2	27.6857	Neutral	ydfI	putative NAD-dependent D-mannonate oxidoreductase	WP_000527743.1	Not Essential
1574	b4600	chromosome	Pseudogene	pseudogene	73	42.5	22	Regional	ydfJ	---	---	Not Essential
1575	b1544	chromosome	Protein_Coding	protein_coding	18	16.7	4.66667	Underrepresented	ydfK	cold shock protein, function unknown, Qin prophage	WP_000836768.1	Not Essential
1576	b4600	chromosome	Pseudogene	pseudogene	73	42.5	22	Regional	ydfJ	---	---	Not Essential
1577	b1545	chromosome	Protein_Coding	protein_coding	23	43.5	21.1	Neutral	pinQ	Qin prophage; putative site-specific recombinase	WP_000078177.1	Not Essential
1578	b1546	chromosome	Protein_Coding	protein_coding	26	53.8	22.2143	Neutral	tfaQ	Qin prophage; putative tail fibre assembly protein	WP_000885611.1	Not Essential
1579	b1547	chromosome	Protein_Coding	protein_coding	49	67.3	33.0606	Neutral	stfQ	Qin prophage; putative side tail fibre assembly protein	WP_001027733.1	Not Essential
1580	b1548	chromosome	Pseudogene	pseudogene	15	66.7	29.1	Neutral	nohQ	---	---	Not Essential
1581	b4600	chromosome	Pseudogene	pseudogene	73	42.5	22	Underrepresented	ydfJ	---	---	Not Essential
1582	b1549	chromosome	Protein_Coding	protein_coding	40	5	2.5	Underrepresented	ydfO	Qin prophage; uncharacterized protein	WP_000373090.1	Not Essential
1583	b1550	chromosome	Protein_Coding	protein_coding	14	0	0	Underrepresented	gnsB	Qin prophage; multicopy suppressor of secG(Cs) and fabA6(Ts)	WP_001019606.1	Not Essential
1584	b1551	chromosome	Protein_Coding	protein_coding	8	62.5	16.2	Neutral	ynfN	Qin prophage; cold shock-induced protein	WP_001309517.1	Not Essential
1585	b1552	chromosome	Protein_Coding	protein_coding	8	0	0	Underrepresented	cspI	Qin prophage; cold shock protein	WP_000066495.1	Not Essential
1586	b1553	chromosome	Protein_Coding	protein_coding	13	38.5	16	Neutral	rzpQ	Rz-like protein, Qin prophage	WP_001071769.1	Not Essential
1587	b1554	chromosome	Protein_Coding	protein_coding	24	45.8	13.8182	Neutral	rrrQ	Qin prophage; putative lysozyme	WP_001092971.1	Not Essential
1588	b1555	chromosome	Protein_Coding	protein_coding	15	66.7	9.7	Neutral	ydfR	Qin prophage; uncharacterized protein	WP_000189916.1	Not Essential
1589	b1556	chromosome	Protein_Coding	protein_coding	14	42.9	16.3333	Regional	essQ	Qin prophage; putative S lysis protein	WP_000839590.1	Not Essential
1590	b1557	chromosome	Protein_Coding	protein_coding	17	29.4	9.8	Underrepresented	cspB	Qin prophage; cold shock protein	WP_000066484.1	Not Essential
1591	b1558	chromosome	Protein_Coding	protein_coding	7	14.3	95	Neutral	cspF	Qin prophage; cold shock protein	WP_000087756.1	Not Essential
1592	b1559	chromosome	Protein_Coding	protein_coding	41	68.3	20.3214	Neutral	quuQ	Qin prophage; putative antitermination protein Q	WP_001047135.1	Not Essential
1593	b1560	chromosome	Protein_Coding	protein_coding	42	64.3	36.0741	Neutral	ydfU	Qin prophage; uncharacterized protein	WP_001393597.1	Not Essential
1594	b4600	chromosome	Pseudogene	pseudogene	73	42.5	22	Neutral	ydfJ	---	---	Not Essential
1595	b1561	chromosome	Protein_Coding	protein_coding	11	54.5	27.8333	Neutral	rem	Qin prophage; uncharacterized protein	WP_000980994.1	Not Essential
1596	b4600	chromosome	Pseudogene	pseudogene	73	42.5	22	Neutral	ydfJ	---	---	Not Essential
1597	b1562	chromosome	Protein_Coding	protein_coding	8	62.5	24.4	Neutral	hokD	Qin prophage; small toxic polypeptide	WP_000813254.1	Not Essential
1598	b1563	chromosome	Protein_Coding	protein_coding	15	86.7	15.3846	Neutral	relE	Qin prophage; toxin of the RelE-RelB toxin-antitoxin system	WP_000323025.1	Not Essential
1599	b1564	chromosome	Protein_Coding	protein_coding	12	0	0	Underrepresented	relB	antitoxin of the RelE-RelB toxin-antitoxin syste; transcriptional repressor	WP_000534858.1	Not Essential
1600	b4600	chromosome	Pseudogene	pseudogene	73	42.5	22	Underrepresented	ydfJ	---	---	Not Essential
1601	b1565	chromosome	Protein_Coding	protein_coding	19	52.6	17.1	Regional	ydfV	Qin prophage; uncharacterized protein	WP_001326990.1	Not Essential
1602	b4600	chromosome	Pseudogene	pseudogene	73	42.5	22	Neutral	ydfJ	---	---	Not Essential
1603	b1566	chromosome	Protein_Coding	protein_coding	11	27.3	9.33333	Neutral	flxA	Qin prophage; uncharacterized protein	WP_001301033.1	Not Essential
1604	b4600	chromosome	Pseudogene	pseudogene	73	42.5	22	Neutral	ydfJ	---	---	Not Essential
1605	b1567	chromosome	Pseudogene	pseudogene	12	58.3	8	Neutral	intK	---	---	Not Essential
1606	b4600	chromosome	Pseudogene	pseudogene	73	42.5	22	Neutral	ydfJ	---	---	Not Essential
1607	b1568	chromosome	Pseudogene	pseudogene	10	60	17.6667	Neutral	ydfX	---	---	Not Essential
1608	b1569	chromosome	Protein_Coding	protein_coding	11	54.5	25	Neutral	dicC	Qin prophage; DNA-binding transcriptional regulator for DicB	WP_000920568.1	Not Essential
1609	b1570	chromosome	Protein_Coding	protein_coding	20	0	0	Underrepresented	dicA	Qin prophage; putative regulator for DicB	WP_000448564.1	Not Essential
1610	b1571	chromosome	Protein_Coding	protein_coding	6	50	16	Neutral	ydfA	Qin prophage; uncharacterized protein	WP_000379575.1	Not Essential
1611	b1572	chromosome	Protein_Coding	protein_coding	4	25	16	Neutral	ydfB	Qin prophage; uncharacterized protein	WP_000344964.1	Not Essential
1612	b1573	chromosome	Protein_Coding	protein_coding	11	72.7	32.125	Neutral	ydfC	uncharacterized protein, Qin prophage	WP_001171942.1	Not Essential
1613	b1574	chromosome	RNA	antisense_RNA	2	0	0	Underrepresented	dicF	sRNA antisense regulator, inhibits ftsZ, Hfq-dependent; Qin prophage	---	Not Essential
1614	b1575	chromosome	Protein_Coding	protein_coding	14	28.6	12	Underrepresented	dicB	Qin prophage; cell division inhibition protein	WP_000854559.1	Not Essential
1615	b1576	chromosome	Protein_Coding	protein_coding	9	22.2	7	Underrepresented	ydfD	Qin prophage; uncharacterized protein	WP_001083297.1	Not Essential
1616	b1577	chromosome	Pseudogene	pseudogene	28	67.9	18.2632	Neutral	ydfE	---	---	Not Essential
1617	b1578	chromosome	Pseudogene	pseudogene	26	73.1	27.1579	Neutral	insD1	---	---	Not Essential
1618	b1579	chromosome	Pseudogene	pseudogene	63	49.2	22	Neutral	intQ	---	---	Not Essential
1619	b4600	chromosome	Pseudogene	pseudogene	73	42.5	22	Underrepresented	ydfJ	---	---	Not Essential
1620	b1580	chromosome	Protein_Coding	protein_coding	54	50	17.6667	Regional	rspB	putative Zn-dependent NAD(P)-binding oxidoreductase	WP_000836066.1	Not Essential
1621	b1581	chromosome	Protein_Coding	protein_coding	54	57.4	21.2258	Neutral	rspA	bifunctional D-altronate/D-mannonate dehydratase	WP_001295394.1	Not Essential
1622	b1582	chromosome	Protein_Coding	protein_coding	13	46.2	36.1667	Neutral	ynfA	UPF0060 family inner membrane protein	WP_000598292.1	Not Essential
1623	b1583	chromosome	Protein_Coding	protein_coding	12	41.7	26	Neutral	ynfB	UPF0482 family putative periplasmic protein	WP_000705211.1	Not Essential
1624	b1584	chromosome	Protein_Coding	protein_coding	31	67.7	32.8571	Neutral	speG	spermidine N(1)-acetyltransferase	WP_001138581.1	Not Essential
1625	b1585	chromosome	Protein_Coding	protein_coding	44	54.5	12	Neutral	ynfC	UPF0257 family lipoprotein	WP_001321287.1	Not Essential
1626	b1586	chromosome	Protein_Coding	protein_coding	18	66.7	31.9167	Neutral	ynfD	DUF1161 family periplasmic protein	WP_001300836.1	Not Essential
1627	b1587	chromosome	Protein_Coding	protein_coding	118	54.2	29.75	Neutral	ynfE	putative selenate reductase, periplasmic	WP_000041675.1	Not Essential
1628	b1588	chromosome	Protein_Coding	protein_coding	99	62.6	35.8548	Neutral	ynfF	S- and N-oxide reductase, A subunit, periplasmic	WP_001340362.1	Not Essential
1629	b1589	chromosome	Protein_Coding	protein_coding	27	44.4	36	Neutral	ynfG	oxidoreductase, Fe-S subunit	WP_000213028.1	Not Essential
1630	b1590	chromosome	Protein_Coding	protein_coding	37	59.5	33.6818	Neutral	ynfH	oxidoreductase, membrane subunit	WP_000526503.1	Not Essential
1631	b1591	chromosome	Protein_Coding	protein_coding	12	41.7	35.6	Neutral	dmsD	twin-argninine leader-binding protein for DmsA and TorA	WP_000148710.1	Not Essential
1632	b1592	chromosome	Protein_Coding	protein_coding	60	63.3	40	Neutral	clcB	H(+)/Cl(-) exchange transporter	WP_001350514.1	Not Essential
1633	b1593	chromosome	Protein_Coding	protein_coding	27	37	23.6	Neutral	ynfK	putative dethiobiotin synthetase	WP_000919231.1	Not Essential
1634	b1594	chromosome	Protein_Coding	protein_coding	51	52.9	42.8148	Neutral	mlc	glucosamine anaerobic growth regulon transcriptional repressor; autorepressor	WP_000225262.1	Not Essential
1635	b1595	chromosome	Protein_Coding	protein_coding	26	34.6	26	Neutral	ynfL	LysR family putative transcriptional regulator	WP_001019525.1	Not Essential
1636	b1596	chromosome	Protein_Coding	protein_coding	50	58	22.4483	Neutral	ynfM	putative arabinose efflux transporter	WP_000091840.1	Not Essential
1637	b1597	chromosome	Protein_Coding	protein_coding	11	54.5	11.1667	Neutral	asr	acid shock-inducible periplasmic protein	WP_001340364.1	Not Essential
1638	b4601	chromosome	Protein_Coding	protein_coding	5	20	1	Neutral	ydgU	stationary phase-induced protein	WP_000233093.1	Not Essential
1639	b1598	chromosome	Protein_Coding	protein_coding	32	53.1	35.8235	Neutral	ydgD	putative peptidase	WP_001260865.1	Not Essential
1640	b1599	chromosome	Protein_Coding	protein_coding	9	55.6	23.4	Neutral	mdtI	multidrug efflux system transporter	WP_000046661.1	Not Essential
1641	b1600	chromosome	Protein_Coding	protein_coding	31	16.1	10.2	Underrepresented	mdtJ	multidrug efflux system transporter	WP_000276149.1	Not Essential
1642	b1601	chromosome	Protein_Coding	protein_coding	44	68.2	37.1667	Neutral	tqsA	pheromone AI-2 transporter	WP_001118241.1	Not Essential
1643	b1602	chromosome	Protein_Coding	protein_coding	53	54.7	45.4828	Neutral	pntB	pyridine nucleotide transhydrogenase, beta subunit	WP_000014036.1	Not Essential
1644	b1603	chromosome	Protein_Coding	protein_coding	49	61.2	39.3333	Neutral	pntA	pyridine nucleotide transhydrogenase, alpha subunit	WP_001300486.1	Not Essential
1645	b1604	chromosome	Protein_Coding	protein_coding	40	62.5	27.72	Neutral	ydgH	DUF1471 family periplasmic protein	WP_000769303.1	Not Essential
1646	b1605	chromosome	Protein_Coding	protein_coding	47	68.1	29.5312	Neutral	ydgI	putative arginine/ornithine antiporter transporter	WP_000412379.1	Not Essential
1647	b1606	chromosome	Protein_Coding	protein_coding	34	73.5	22.08	Neutral	folM	dihydromonapterin reductase, NADPH-dependent; dihydrofolate reductase isozyme	WP_000520804.1	Not Essential
1648	b1607	chromosome	Protein_Coding	protein_coding	20	50	31.1	Neutral	ydgC	GlpM family inner membrane protein	WP_000524868.1	Not Essential
1649	b1608	chromosome	Protein_Coding	protein_coding	33	48.5	32.875	Neutral	rstA	response regulator of RstAB two-component system	WP_001092508.1	Not Essential
1650	b1609	chromosome	Protein_Coding	protein_coding	59	59.3	26.3429	Neutral	rstB	sensory histidine kinase of RstAB two-component system	WP_000732512.1	Not Essential
1651	b1610	chromosome	Protein_Coding	protein_coding	38	47.4	25.1667	Neutral	tus	inhibitor of replication at Ter, DNA-binding protein	WP_000135181.1	Not Essential
1652	b1611	chromosome	Protein_Coding	protein_coding	44	34.1	22.8	Regional	fumC	fumarate hydratase (fumarase C),aerobic Class II	WP_001099085.1	Not Essential
1653	b1612	chromosome	Protein_Coding	protein_coding	72	58.3	18.4048	Neutral	fumA	fumarate hydratase (fumarase A), aerobic Class I	WP_000066639.1	Not Essential
1654	b1613	chromosome	Protein_Coding	protein_coding	37	37.8	13.7857	Neutral	manA	mannose-6-phosphate isomerase	WP_001170664.1	Not Essential
1655	b1614	chromosome	Protein_Coding	protein_coding	59	49.2	18.0345	Neutral	ydgA	DUF945 family protein	WP_001043339.1	Not Essential
1656	b1615	chromosome	Protein_Coding	protein_coding	87	46	18.475	Neutral	uidC	putative outer membrane porin for beta-glucuronides porin protein	WP_001227023.1	Not Essential
1657	b1616	chromosome	Protein_Coding	protein_coding	66	50	32.4242	Neutral	uidB	glucuronide transporter	WP_001075849.1	Not Essential
1658	b1617	chromosome	Protein_Coding	protein_coding	70	75.7	34.6415	Neutral	uidA	beta-D-glucuronidase	WP_000945878.1	Not Essential
1659	b1618	chromosome	Protein_Coding	protein_coding	21	66.7	21.3571	Neutral	uidR	transcriptional repressor	WP_000969092.1	Not Essential
1660	b1619	chromosome	Protein_Coding	protein_coding	38	47.4	21.3889	Neutral	hdhA	7-alpha-hydroxysteroid dehydrogenase, NAD-dependent	WP_000483353.1	Not Essential
1661	b1620	chromosome	Protein_Coding	protein_coding	36	52.8	23.2105	Neutral	malI	transcriptional repressor of Mal regulon	WP_000179510.1	Not Essential
1662	b1621	chromosome	Protein_Coding	protein_coding	70	54.3	36.2895	Neutral	malX	maltose and glucose-specific PTS enzyme IIB component and IIC component	WP_000125583.1	Not Essential
1663	b1622	chromosome	Protein_Coding	protein_coding	55	63.6	34.9143	Neutral	malY	PLP-dependent beta-cystathionase and maltose regulon regulator	WP_000459379.1	Not Essential
1664	b1623	chromosome	Protein_Coding	protein_coding	31	54.8	27.6471	Neutral	add	adenosine deaminase	WP_000567490.1	Not Essential
1665	b1624	chromosome	Protein_Coding	protein_coding	45	55.6	41.04	Neutral	ydgJ	putative oxidoreductase	WP_001282550.1	Not Essential
1666	b4409	chromosome	Protein_Coding	protein_coding	5	60	40.6667	Neutral	blr	beta-lactam resistance membrane protein; divisome-associated protein	WP_001300888.1	Not Essential
1667	b1625	chromosome	Protein_Coding	protein_coding	11	45.5	23	Neutral	cnu	nucleoid-associated oriC-binding protein; H-NS and StpA stabilizing factor	WP_000217950.1	Not Essential
1668	b1626	chromosome	Protein_Coding	protein_coding	25	64	25.375	Neutral	ydgK	DUF2569 family inner membrane protein	WP_001310854.1	Not Essential
1669	b1627	chromosome	Protein_Coding	protein_coding	23	30.4	8	Underrepresented	rsxA	SoxR iron-sulfur cluster reduction factor component; inner membrane protein of electron transport complex	WP_000133193.1	Not Essential
1670	b1628	chromosome	Protein_Coding	protein_coding	22	13.6	14.3333	Underrepresented	rsxB	SoxR iron-sulfur cluster reduction factor component; putative iron-sulfur protein	WP_000991805.1	Not Essential
1671	b1629	chromosome	Protein_Coding	protein_coding	81	19.8	10	Underrepresented	rsxC	SoxR iron-sulfur cluster reduction factor component; putative membrane-associated NADH oxidoreductase of electron transport complex	WP_000915778.1	Not Essential
1672	b1630	chromosome	Protein_Coding	protein_coding	57	24.6	15.2857	Underrepresented	rsxD	SoxR iron-sulfur cluster reduction factor component; putative membrane protein of electron transport complex	WP_000231927.1	Not Essential
1673	b1631	chromosome	Protein_Coding	protein_coding	24	29.2	11.4286	Regional	rsxG	SoxR iron-sulfur cluster reduction factor component; putative membrane protein of electron transport complex	WP_000920784.1	Not Essential
1674	b1632	chromosome	Protein_Coding	protein_coding	23	21.7	10.2	Underrepresented	rsxE	SoxR iron-sulfur cluster reduction factor component; electron transport inner membrane NADH-quinone reductase	WP_001289652.1	Not Essential
1675	b1633	chromosome	Protein_Coding	protein_coding	29	72.4	19.1429	Neutral	nth	DNA glycosylase and apyrimidinic (AP) lyase (endonuclease III)	WP_001030339.1	Not Essential
1676	b1634	chromosome	Protein_Coding	protein_coding	76	53.9	27.6098	Neutral	dtpA	dipeptide and tripeptide permease A	WP_000100932.1	Not Essential
1677	b1635	chromosome	Protein_Coding	protein_coding	30	66.7	35.15	Neutral	gstA	glutathionine S-transferase	WP_000765749.1	Not Essential
1678	b1636	chromosome	Protein_Coding	protein_coding	31	41.9	13.3846	Neutral	pdxY	pyridoxamine kinase	WP_001307229.1	Not Essential
1679	b1637	chromosome	Protein_Coding	protein_coding	45	2.2	8	Underrepresented	tyrS	tyrosyl-tRNA synthetase	WP_001295400.1	Essential
1680	b1638	chromosome	Protein_Coding	protein_coding	21	0	0	Underrepresented	pdxH	pyridoxine 5'-phosphate oxidase	WP_001282319.1	Not Essential
1681	b1639	chromosome	Protein_Coding	protein_coding	18	61.1	7.63636	Neutral	mliC	inhibitor of c-type lysozyme, membrane-bound; putative lipoprotein	WP_000178044.1	Not Essential
1682	b1640	chromosome	Protein_Coding	protein_coding	40	67.5	26.2222	Neutral	anmK	anhydro-N-acetylmuramic acid kinase	WP_000835039.1	Not Essential
1683	b1641	chromosome	Protein_Coding	protein_coding	23	43.5	30.9	Neutral	slyB	outer membrane lipoprotein	WP_000597196.1	Not Essential
1684	b1642	chromosome	Protein_Coding	protein_coding	21	81	33.4118	Neutral	slyA	global transcriptional regulator	WP_001296943.1	Not Essential
1685	b1643	chromosome	Protein_Coding	protein_coding	9	22.2	80	Neutral	ydhI	DUF1656 family putative inner membrane efflux pump associated protein	WP_000670998.1	Not Essential
1686	b1644	chromosome	Protein_Coding	protein_coding	41	46.3	25.1053	Neutral	ydhJ	putative membrane fusion protein (MFP) of YdhJK efflux pump	WP_001300356.1	Not Essential
1687	b1645	chromosome	Protein_Coding	protein_coding	84	59.5	38.02	Neutral	ydhK	putative efflux protein (PET) component of YdhJK efflux pump	WP_000994333.1	Not Essential
1688	b1646	chromosome	Protein_Coding	protein_coding	21	52.4	18.7273	Neutral	sodC	superoxide dismutase, Cu, Zn, periplasmic	WP_001296937.1	Not Essential
1689	b1647	chromosome	Protein_Coding	protein_coding	40	80	35.5312	Neutral	ydhF	putative oxidoreductase	WP_000250656.1	Not Essential
1690	b1648	chromosome	Protein_Coding	protein_coding	7	71.4	7.8	Neutral	ydhL	DUF1289 family protein	WP_000840481.1	Not Essential
1691	b1649	chromosome	Protein_Coding	protein_coding	22	72.7	33.9375	Neutral	nemR	transcriptional repressor for the nemRA-gloA operon, quinone-, glyoxal-, and HOCl-activated	WP_001032936.1	Not Essential
1692	b1650	chromosome	Protein_Coding	protein_coding	41	58.5	47.375	Neutral	nemA	chromate reductase, quinone reductase, FMN-linked; N-Ethylmaleimide reductase; old yellow enzyme	WP_000093589.1	Not Essential
1693	b1651	chromosome	Protein_Coding	protein_coding	22	59.1	22	Neutral	gloA	glyoxalase I, Ni-dependent	WP_001237796.1	Not Essential
1694	b1652	chromosome	Protein_Coding	protein_coding	19	10.5	37.5	Underrepresented	rnt	RNase T; exoribonuclease T; structured DNA 3' exonuclease; RNA processing; DNA repair	WP_001282283.1	Not Essential
1695	b1653	chromosome	Protein_Coding	protein_coding	154	55.8	36.2674	Neutral	lhr	putative ATP-dependent helicase	WP_001310858.1	Not Essential
1696	b1654	chromosome	Protein_Coding	protein_coding	11	81.8	13.8889	Neutral	grxD	glutaredoxin-4	WP_000108172.1	Not Essential
1697	b1655	chromosome	Protein_Coding	protein_coding	40	55	14.3636	Neutral	mepH	murein DD-endopeptidase, space-maker hydrolase	WP_000101193.1	Not Essential
1698	b1656	chromosome	Protein_Coding	protein_coding	26	61.5	34	Neutral	sodB	superoxide dismutase, Fe	WP_000007283.1	Not Essential
1699	b1657	chromosome	Protein_Coding	protein_coding	45	68.9	41.9677	Neutral	ydhP	putative MFS transporter, inner membrane protein	WP_000701040.1	Not Essential
1700	b4602	chromosome	Protein_Coding	protein_coding	4	50	18.5	Neutral	ynhF	stress response membrane	WP_000102278.1	Not Essential
1701	b1658	chromosome	Protein_Coding	protein_coding	31	29	24.8889	Neutral	purR	transcriptional repressor, hypoxanthine-binding	WP_000190982.1	Not Essential
1702	b1659	chromosome	Protein_Coding	protein_coding	37	70.3	48	Neutral	ydhB	LysR family putative transcriptional regulator	WP_000269501.1	Not Essential
1703	b1660	chromosome	Protein_Coding	protein_coding	53	58.5	18.7097	Neutral	ydhC	putative arabinose efflux transporter	WP_001182347.1	Not Essential
1704	b1661	chromosome	Protein_Coding	protein_coding	61	59	35	Neutral	cfa	cyclopropane fatty acyl phospholipid synthase, SAM-dependent	WP_000098896.1	Not Essential
1705	b1662	chromosome	Protein_Coding	protein_coding	29	0	0	Underrepresented	ribC	riboflavin synthase, alpha subunit	WP_000493947.1	Essential
1706	b1663	chromosome	Protein_Coding	protein_coding	66	62.1	25.4634	Neutral	mdtK	multidrug efflux system transporter	WP_001174940.1	Not Essential
1707	b1664	chromosome	Protein_Coding	protein_coding	46	63	32.4138	Neutral	ydhQ	autotransporter adhesin-related protein	WP_000534271.1	Not Essential
1708	b1665	chromosome	RNA	tRNA	2	0	0	Underrepresented	valV	tRNA-Val	---	Not Essential
1709	b1666	chromosome	RNA	tRNA	2	0	0	Underrepresented	valW	tRNA-Val	---	Not Essential
1710	b1667	chromosome	Protein_Coding	protein_coding	9	55.6	34.6	Neutral	ydhR	putative monooxygenase	WP_000212657.1	Not Essential
1711	b1668	chromosome	Protein_Coding	protein_coding	78	64.1	23.88	Neutral	ydhS	putative oxidoreductase	WP_000716950.1	Not Essential
1712	b1669	chromosome	Protein_Coding	protein_coding	31	58.1	36.4444	Neutral	ydhT	FNR, Nar, NarP-regulated protein; putative subunit of YdhYVWXUT oxidoreductase complex	WP_000587525.1	Not Essential
1713	b1670	chromosome	Protein_Coding	protein_coding	34	64.7	21.1818	Neutral	ydhU	putative cytochrome b subunit of YdhYVWXUT oxidoreductase complex	WP_001069979.1	Not Essential
1714	b1671	chromosome	Protein_Coding	protein_coding	28	50	19	Neutral	ydhX	putative 4Fe-4S ferridoxin-type protein; FNR, Nar, NarP-regulated protein; putative subunit of YdhYVWXUT oxidoreductase complex	WP_001310861.1	Not Essential
1715	b1672	chromosome	Protein_Coding	protein_coding	26	73.1	23.2632	Neutral	ydhW	FNR, Nar, NarP-regulated protein; putative subunit of YdhYVWXUT oxidoreductase complex	WP_000517579.1	Not Essential
1716	b1673	chromosome	Protein_Coding	protein_coding	101	54.5	22.6909	Neutral	ydhV	putative oxidoreductase subunit	WP_001273527.1	Not Essential
1717	b1674	chromosome	Protein_Coding	protein_coding	37	43.2	25.375	Neutral	ydhY	putative 4Fe-4S ferridoxin-type protein; FNR, Nar, NarP-regulated protein; putative subunit of YdhYVWXUT oxidoreductase complex	WP_001070230.1	Not Essential
1718	b1675	chromosome	Protein_Coding	protein_coding	11	36.4	53.75	Regional	ydhZ	uncharacterized protein	WP_000528342.1	Not Essential
1719	b1676	chromosome	Protein_Coding	protein_coding	54	29.6	8.8125	Underrepresented	pykF	pyruvate kinase I	WP_001295403.1	Not Essential
1720	b1677	chromosome	Protein_Coding	protein_coding	13	15.4	4.5	Underrepresented	lpp	murein lipoprotein	WP_000648420.1	Not Essential
1721	b1678	chromosome	Protein_Coding	protein_coding	57	54.4	21.9032	Neutral	ldtE	murein L,D-transpeptidase	WP_000817105.1	Not Essential
1722	b1679	chromosome	Protein_Coding	protein_coding	18	61.1	7.63636	Neutral	sufE	sulfur acceptor protein	WP_001196530.1	Not Essential
1723	b1680	chromosome	Protein_Coding	protein_coding	45	75.6	23.5882	Neutral	sufS	cysteine desulfurase, stimulated by SufE; selenocysteine lyase, PLP-dependent	WP_000577988.1	Not Essential
1724	b1681	chromosome	Protein_Coding	protein_coding	41	48.8	21.2	Neutral	sufD	component of SufBCD Fe-S cluster assembly scaffold	WP_000907979.1	Not Essential
1725	b1682	chromosome	Protein_Coding	protein_coding	32	53.1	33.0588	Neutral	sufC	SufBCD Fe-S cluster assembly scaffold protein, ATP-binding protein	WP_000948863.1	Not Essential
1726	b1683	chromosome	Protein_Coding	protein_coding	59	52.5	22.129	Neutral	sufB	component of SufBCD Fe-S cluster assembly scaffold	WP_000089364.1	Not Essential
1727	b1684	chromosome	Protein_Coding	protein_coding	13	61.5	19.5	Neutral	sufA	Fe-S cluster assembly protein	WP_000367160.1	Not Essential
1728	b4430	chromosome	RNA	ncRNA	5	40	11	Neutral	rydB	novel sRNA, function unknown	---	Not Essential
1729	b1685	chromosome	Protein_Coding	protein_coding	8	62.5	25.6	Neutral	ydiH	uncharacterized protein	WP_001296104.1	Not Essential
1730	b1686	chromosome	Protein_Coding	protein_coding	12	58.3	37	Neutral	menI	1,4-dihydroxy-2-naphthoyl-CoA hydrolase	WP_000637982.1	Not Essential
1731	b1687	chromosome	Protein_Coding	protein_coding	113	34.5	17.5385	Neutral	ydiJ	putative FAD-linked oxidoreductase	WP_000613008.1	Not Essential
1732	b1688	chromosome	Protein_Coding	protein_coding	48	60.4	25.8966	Neutral	ydiK	UPF0118 family inner membrane protein	WP_000248636.1	Not Essential
1733	b4431	chromosome	RNA	antisense_RNA	7	0	0	Underrepresented	rprA	sRNA antisense activator for RpoS translation, Hfq-dependent	---	Not Essential
1734	b1689	chromosome	Protein_Coding	protein_coding	16	31.2	27.6	Neutral	ydiL	putative HTH domain DNA-binding protein	WP_001310864.1	Not Essential
1735	b1690	chromosome	Protein_Coding	protein_coding	88	43.2	26.2632	Neutral	ydiM	putative MFS transporter, membrane protein	WP_000795537.1	Not Essential
1736	b1691	chromosome	Protein_Coding	protein_coding	87	33.3	23.2414	Regional	ydiN	putative MFS transporter, membrane protein	WP_000081197.1	Not Essential
1737	b1692	chromosome	Protein_Coding	protein_coding	42	40.5	19.8824	Neutral	ydiB	quinate/shikimate 5-dehydrogenase, NAD(P)-binding	WP_000383469.1	Not Essential
1738	b1693	chromosome	Protein_Coding	protein_coding	32	15.6	6	Underrepresented	aroD	3-dehydroquinate dehydratase	WP_000860201.1	Not Essential
1739	b1694	chromosome	Protein_Coding	protein_coding	90	34.4	14.6774	Regional	ydiF	putative acetyl-CoA:acetoacetyl-CoA transferase: alpha subunit/beta subunit	WP_000805700.1	Not Essential
1740	b1695	chromosome	Protein_Coding	protein_coding	51	49	23.44	Neutral	ydiO	putative acyl-CoA dehydrogenase	WP_000347850.1	Not Essential
1741	b1696	chromosome	Protein_Coding	protein_coding	59	20.3	20.25	Regional	ydiP	putative DNA-binding transcriptional regulator	WP_000284799.1	Not Essential
1742	b1697	chromosome	Protein_Coding	protein_coding	23	56.5	32.4615	Neutral	ydiQ	putative electron transfer flavoprotein subunit	WP_000692135.1	Not Essential
1743	b1698	chromosome	Protein_Coding	protein_coding	35	60	28.5238	Neutral	ydiR	putative electron transfer flavoprotein, FAD-binding subunit	WP_000080722.1	Not Essential
1744	b1699	chromosome	Protein_Coding	protein_coding	40	47.5	27.3158	Neutral	ydiS	putative oxidoreductase	WP_001278525.1	Not Essential
1745	b1700	chromosome	Protein_Coding	protein_coding	16	43.8	18.5714	Neutral	ydiT	putative 3Fe-4S ferredoxin-type protein	WP_000081081.1	Not Essential
1746	b1701	chromosome	Protein_Coding	protein_coding	84	47.6	21.175	Neutral	fadK	short chain acyl-CoA synthetase, anaerobic	WP_001336282.1	Not Essential
1747	b1702	chromosome	Protein_Coding	protein_coding	63	42.9	35.0741	Regional	ppsA	phosphoenolpyruvate synthase	WP_000069375.1	Not Essential
1748	b1703	chromosome	Protein_Coding	protein_coding	41	58.5	25.25	Neutral	ppsR	PEP synthase kinase and PEP synthase pyrophosphorylase	WP_000368046.1	Not Essential
1749	b1704	chromosome	Protein_Coding	protein_coding	49	44.9	28.1364	Neutral	aroH	3-deoxy-D-arabino-heptulosonate-7-phosphate synthase, tryptophan repressible	WP_001082229.1	Not Essential
1750	b1705	chromosome	Protein_Coding	protein_coding	9	22.2	10	Underrepresented	ydiE	hemin uptake protein HemP homolog	WP_001270809.1	Not Essential
1751	b1706	chromosome	Protein_Coding	protein_coding	60	55	22.8485	Neutral	ydiU	UPF0061 family protein	WP_000175703.1	Not Essential
1752	b1707	chromosome	Protein_Coding	protein_coding	45	24.4	9.09091	Regional	ydiV	anti-FlhD4C2 factor, inactive EAL family phosphodiesterase	WP_001300634.1	Not Essential
1753	b1708	chromosome	Protein_Coding	protein_coding	19	63.2	10.9167	Neutral	nlpC	putative C40 clan peptidase lipoprotein	WP_001209795.1	Not Essential
1754	b1709	chromosome	Protein_Coding	protein_coding	18	66.7	17.1667	Neutral	btuD	vitamin B12 ABC transporter ATPase	WP_000029474.1	Not Essential
1755	b1710	chromosome	Protein_Coding	protein_coding	21	57.1	20.75	Neutral	btuE	glutathione peroxidase	WP_001154168.1	Not Essential
1756	b1711	chromosome	Protein_Coding	protein_coding	46	67.4	34.3226	Neutral	btuC	vitamin B12 ABC transporter permease	WP_000956528.1	Not Essential
1757	b1712	chromosome	Protein_Coding	protein_coding	12	0	0	Underrepresented	ihfA	integration host factor (IHF), DNA-binding protein, alpha subunit	WP_001229265.1	Not Essential
1758	b1713	chromosome	Protein_Coding	protein_coding	69	0	0	Underrepresented	pheT	phenylalanine tRNA synthetase, beta subunit	WP_000672380.1	Essential
1759	b1714	chromosome	Protein_Coding	protein_coding	34	0	0	Underrepresented	pheS	phenylalanine tRNA synthetase, alpha subunit	WP_000018596.1	Essential
1760	b1715	chromosome	Protein_Coding	protein_coding	3	0	0	Underrepresented	pheM	phenylalanyl-tRNA synthetase operon leader peptide	WP_001386830.1	Not Essential
1761	b1716	chromosome	Protein_Coding	protein_coding	20	0	0	Underrepresented	rplT	50S ribosomal subunit protein L20	WP_000124850.1	Essential
1762	b1717	chromosome	Protein_Coding	protein_coding	10	0	0	Underrepresented	rpmI	50S ribosomal subunit protein L35	WP_001124225.1	Not Essential
1763	b1718	chromosome	Protein_Coding	protein_coding	25	0	0	Underrepresented	infC	translation initiation factor IF-3	WP_001700733.1	Essential
1764	b1719	chromosome	Protein_Coding	protein_coding	83	0	0	Underrepresented	thrS	threonyl-tRNA synthetase	WP_001144202.1	Essential
1765	b4494	chromosome	Pseudogene	pseudogene	150	20.7	15.5161	Regional	arpB	---	---	Not Essential
1766	b4535	chromosome	Protein_Coding	protein_coding	5	100	51.2	Neutral	yniD	uncharacterized protein	WP_001142445.1	Not Essential
1767	b1722	chromosome	Protein_Coding	protein_coding	38	65.8	36.44	Neutral	ydiY	acid-inducible putative outer membrane protein	WP_000771391.1	Not Essential
1768	b1723	chromosome	Protein_Coding	protein_coding	31	71	30.5455	Neutral	pfkB	6-phosphofructokinase II	WP_000251727.1	Not Essential
1769	b1724	chromosome	Protein_Coding	protein_coding	15	40	26.1667	Neutral	ydiZ	uncharacterized protein	WP_000146159.1	Not Essential
1770	b1725	chromosome	Protein_Coding	protein_coding	33	39.4	10.3846	Neutral	yniA	fructosamine kinase family protein	WP_000267650.1	Not Essential
1771	b1726	chromosome	Protein_Coding	protein_coding	26	61.5	15.1875	Neutral	yniB	putative inner membrane protein	WP_000222163.1	Not Essential
1772	b1727	chromosome	Protein_Coding	protein_coding	29	69	38.05	Neutral	yniC	2-deoxyglucose-6-P phosphatase	WP_000106833.1	Not Essential
1773	b1728	chromosome	Protein_Coding	protein_coding	24	66.7	26.5625	Neutral	ydjM	inner membrane protein regulated by LexA	WP_001297653.1	Not Essential
1774	b1729	chromosome	Protein_Coding	protein_coding	57	47.4	28.9259	Neutral	ydjN	putative transporter	WP_001010696.1	Not Essential
1775	b1730	chromosome	Protein_Coding	protein_coding	77	19.5	10.4	Regional	ydjO	uncharacterized protein	WP_001310874.1	Not Essential
1776	b1731	chromosome	Protein_Coding	protein_coding	8	75	46.5	Neutral	cedA	cell division modulator	WP_001295480.1	Not Essential
1777	b1732	chromosome	Protein_Coding	protein_coding	84	64.3	26.5	Neutral	katE	catalase HPII, heme d-containing	WP_000077872.1	Not Essential
1778	b1733	chromosome	Protein_Coding	protein_coding	32	62.5	42.95	Neutral	chbG	chito-oligosaccharide deacetylase	WP_000440471.1	Not Essential
1779	b1734	chromosome	Protein_Coding	protein_coding	78	42.3	18.4545	Neutral	chbF	phospho-chitobiase; general 6-phospho-beta-glucosidase activity	WP_000078765.1	Not Essential
1780	b1735	chromosome	Protein_Coding	protein_coding	59	15.3	20.5556	Underrepresented	chbR	repressor of chb operon for N,N'-diacetylchitobiose utilization	WP_000983647.1	Not Essential
1781	b1736	chromosome	Protein_Coding	protein_coding	10	80	17.5	Neutral	chbA	N,N'-diacetylchitobiose-specific enzyme IIA component of PTS	WP_000968919.1	Not Essential
1782	b1737	chromosome	Protein_Coding	protein_coding	80	55	28.1136	Regional	chbC	N,N'-diacetylchitobiose-specific enzyme IIC component of PTS	WP_000073041.1	Not Essential
1783	b1738	chromosome	Protein_Coding	protein_coding	18	38.9	18.7143	Regional	chbB	N,N'-diacetylchitobiose-specific enzyme IIB component of PTS	WP_000412169.1	Not Essential
1784	b1739	chromosome	Protein_Coding	protein_coding	18	61.1	18.7273	Neutral	osmE	osmotically-inducible lipoprotein	WP_001039044.1	Not Essential
1785	b1740	chromosome	Protein_Coding	protein_coding	40	0	0	Underrepresented	nadE	NAD synthetase, NH3/glutamine-dependent	WP_000175026.1	Essential
1786	b1741	chromosome	Protein_Coding	protein_coding	37	54.1	22.45	Neutral	cho	endonuclease of nucleotide excision repair	WP_000252397.1	Not Essential
1787	b1742	chromosome	Protein_Coding	protein_coding	20	65	15.7692	Neutral	ves	cold- and stress-inducible protein	WP_001300480.1	Not Essential
1788	b1743	chromosome	Protein_Coding	protein_coding	15	46.7	7.28571	Neutral	spy	periplasmic ATP-independent protein refolding chaperone, stress-induced	WP_001228984.1	Not Essential
1789	b1744	chromosome	Protein_Coding	protein_coding	38	36.8	15	Regional	astE	succinylglutamate desuccinylase	WP_000368506.1	Not Essential
1790	b1745	chromosome	Protein_Coding	protein_coding	46	30.4	25.9286	Regional	astB	succinylarginine dihydrolase	WP_000994973.1	Not Essential
1791	b1746	chromosome	Protein_Coding	protein_coding	52	26.9	8.85714	Underrepresented	astD	succinylglutamic semialdehyde dehydrogenase	WP_000177206.1	Not Essential
1792	b1747	chromosome	Protein_Coding	protein_coding	28	32.1	22.2222	Regional	astA	arginine succinyltransferase	WP_000989419.1	Not Essential
1793	b1748	chromosome	Protein_Coding	protein_coding	49	46.9	19.3043	Neutral	astC	succinylornithine transaminase, PLP-dependent	WP_000081983.1	Not Essential
1794	b1749	chromosome	Protein_Coding	protein_coding	29	48.3	19.2857	Neutral	xthA	exonuclease III	WP_000673918.1	Not Essential
1795	b1750	chromosome	Protein_Coding	protein_coding	46	71.7	26.8485	Neutral	ydjX	TVP38/TMEM64 family inner membrane protein	WP_001300395.1	Not Essential
1796	b1751	chromosome	Protein_Coding	protein_coding	30	60	24.5556	Neutral	ydjY	putative ferrodoxin-like lipoprotein	WP_000939212.1	Not Essential
1797	b1752	chromosome	Protein_Coding	protein_coding	27	55.6	36.8667	Neutral	ydjZ	TVP38/TMEM64 family inner membrane protein	WP_000980098.1	Not Essential
1798	b1753	chromosome	Protein_Coding	protein_coding	20	45	37.4444	Neutral	ynjA	carboxymuconolactone decarboxylase family protein	WP_000524097.1	Not Essential
1799	b1754	chromosome	Protein_Coding	protein_coding	35	54.3	26.0526	Neutral	ynjB	putative ABC transporter periplasmic binding protein	WP_001215339.1	Not Essential
1800	b1755	chromosome	Protein_Coding	protein_coding	51	58.8	31.4	Neutral	ynjC	putative ABC transporter permease	WP_000224958.1	Not Essential
1801	b1756	chromosome	Protein_Coding	protein_coding	23	56.5	25.2308	Neutral	ynjD	putative ABC transporter ATPase	WP_001300558.1	Not Essential
1802	b1757	chromosome	Protein_Coding	protein_coding	52	59.6	27.0645	Neutral	ynjE	molybdopterin synthase sulfurtransferase	WP_001350515.1	Not Essential
1803	b1758	chromosome	Protein_Coding	protein_coding	24	54.2	23.2308	Neutral	ynjF	CDP-alcohol phosphatidyltransferase family inner membrane protein	WP_001295484.1	Not Essential
1804	b1759	chromosome	Protein_Coding	protein_coding	11	54.5	25.8333	Neutral	nudG	CTP pyrophosphohydrolase; also hydrolyzes 2-hydroxy-dATP, 8-hydroxy-dGTP, 5-hydroxy-CTP, dCTP and 5-methyl-dCTP	WP_000781888.1	Not Essential
1805	b1760	chromosome	Protein_Coding	protein_coding	18	61.1	16	Neutral	ynjH	DUF1496 family protein	WP_000085240.1	Not Essential
1806	b1761	chromosome	Protein_Coding	protein_coding	43	39.5	21.8235	Neutral	gdhA	glutamate dehydrogenase, NADP-specific	WP_000373021.1	Not Essential
1807	b1762	chromosome	Protein_Coding	protein_coding	72	26.4	15.1053	Regional	ynjI	inner membrane protein	WP_000756910.1	Not Essential
1808	b1763	chromosome	Protein_Coding	protein_coding	61	65.6	33.575	Neutral	topB	DNA topoisomerase III	WP_001235800.1	Not Essential
1809	b1764	chromosome	Protein_Coding	protein_coding	29	41.4	32.0833	Neutral	selD	selenophosphate synthase	WP_001295485.1	Not Essential
1810	b1765	chromosome	Protein_Coding	protein_coding	18	33.3	44	Neutral	ydjA	putative oxidoreductase	WP_000339283.1	Not Essential
1811	b1766	chromosome	Protein_Coding	protein_coding	77	55.8	29.8372	Neutral	sppA	protease IV (signal peptide peptidase)	WP_001259810.1	Not Essential
1812	b1767	chromosome	Protein_Coding	protein_coding	48	75	42.6111	Neutral	ansA	cytoplasmic L-asparaginase 1	WP_001170162.1	Not Essential
1813	b1768	chromosome	Protein_Coding	protein_coding	31	61.3	55.1053	Neutral	pncA	nicotinamidase/pyrazinamidase	WP_001135066.1	Not Essential
1814	b1769	chromosome	Protein_Coding	protein_coding	98	32.7	24.6875	Regional	ydjE	putative MFS sugar transporter, membrane protein	WP_000438807.1	Not Essential
1815	b1770	chromosome	Protein_Coding	protein_coding	46	17.4	7.625	Underrepresented	ydjF	putative DNA-binding transcriptional regulator	WP_000719096.1	Not Essential
1816	b1771	chromosome	Protein_Coding	protein_coding	55	58.2	14.9375	Neutral	ydjG	methylglyoxal reductase, NADH-dependent	WP_000723710.1	Not Essential
1817	b1772	chromosome	Protein_Coding	protein_coding	52	26.9	11.8571	Regional	ydjH	putative kinase	WP_000369231.1	Not Essential
1818	b1773	chromosome	Protein_Coding	protein_coding	42	31	27	Regional	ydjI	putative aldolase	WP_000878893.1	Not Essential
1819	b1774	chromosome	Protein_Coding	protein_coding	57	49.1	16.6071	Neutral	ydjJ	putative Zn-dependent NAD(P)-binding oxidoreductase	WP_000798110.1	Not Essential
1820	b1775	chromosome	Protein_Coding	protein_coding	76	52.6	25.5	Neutral	ydjK	putative MFS sugar transporter, membrane protein	WP_000435292.1	Not Essential
1821	b1776	chromosome	Protein_Coding	protein_coding	43	60.5	20.4231	Neutral	ydjL	putative Zn-dependent NAD(P)-binding oxidoreductase	WP_000645221.1	Not Essential
1822	b1777	chromosome	Protein_Coding	protein_coding	12	83.3	30.9	Neutral	yeaC	DUF1315 family protein	WP_001300415.1	Not Essential
1823	b1778	chromosome	Protein_Coding	protein_coding	19	73.7	33.7143	Neutral	msrB	methionine sulfoxide reductase B	WP_001284618.1	Not Essential
1824	b1779	chromosome	Protein_Coding	protein_coding	45	0	0	Underrepresented	gapA	glyceraldehyde-3-phosphate dehydrogenase A	WP_000153502.1	Essential
1825	b1780	chromosome	Protein_Coding	protein_coding	31	67.7	26	Neutral	yeaD	D-hexose-6-phosphate epimerase-like protein	WP_001335909.1	Not Essential
1826	b1781	chromosome	Protein_Coding	protein_coding	36	55.6	29.2	Neutral	yeaE	aldo-keto reductase, methylglyoxal to acetol, NADPH-dependent	WP_001186371.1	Not Essential
1827	b1782	chromosome	Protein_Coding	protein_coding	47	51.1	25.5	Neutral	mipA	scaffolding protein for murein synthesizing machinery	WP_000163771.1	Not Essential
1828	b1783	chromosome	Protein_Coding	protein_coding	81	46.9	21.4737	Neutral	yeaG	protein kinase, endogenous substrate unidentified; autokinase	WP_001019882.1	Not Essential
1829	b1784	chromosome	Protein_Coding	protein_coding	55	50.9	15.5357	Regional	yeaH	UPF0229 family protein	WP_000219687.1	Not Essential
1830	b1785	chromosome	Protein_Coding	protein_coding	109	28.4	19.3871	Regional	yeaI	putative membrane-anchored diguanylate cyclase	WP_000616433.1	Not Essential
1831	b1786	chromosome	Protein_Coding	protein_coding	86	57	16.2041	Neutral	yeaJ	putative diguanylate cyclase	WP_000766132.1	Not Essential
1832	b1787	chromosome	Protein_Coding	protein_coding	20	50	22.8	Neutral	yeaK	aminoacyl-tRNA editing domain protein	WP_000138043.1	Not Essential
1833	b1788	chromosome	Protein_Coding	protein_coding	5	40	17.5	Neutral	yoaI	uncharacterized protein	WP_000999630.1	Not Essential
1834	b1789	chromosome	Protein_Coding	protein_coding	16	62.5	20.7	Neutral	yeaL	UPF0756 family putative inner membrane protein	WP_000460707.1	Not Essential
1835	b1790	chromosome	Protein_Coding	protein_coding	38	63.2	21	Neutral	yeaM	putative DNA-binding transcriptional regulator	WP_000972248.1	Not Essential
1836	b1791	chromosome	Protein_Coding	protein_coding	52	65.4	25.8235	Neutral	yeaN	putative MFS transporter, inner membrane protein	WP_000128491.1	Not Essential
1837	b1792	chromosome	Protein_Coding	protein_coding	12	58.3	39.8571	Neutral	yeaO	DUF488 family protein	WP_001326526.1	Not Essential
1838	b1793	chromosome	Protein_Coding	protein_coding	6	50	11.3333	Neutral	yoaF	DUF333 family outer membrane lipoprotein	WP_000691930.1	Not Essential
1839	b1794	chromosome	Protein_Coding	protein_coding	45	48.9	31.5455	Neutral	yeaP	diguanylate cyclase	WP_001310896.1	Not Essential
1840	b4676	chromosome	Protein_Coding	protein_coding	9	11.1	2	Neutral	yoaK	inner membrane-associated protein	WP_001219350.1	Not Essential
1841	b4675	chromosome	Protein_Coding	protein_coding	5	80	9.5	Neutral	yoaJ	inner membrane-associated protein	WP_001386836.1	Not Essential
1842	b1795	chromosome	Protein_Coding	protein_coding	15	46.7	14.4286	Neutral	yeaQ	UPF0410 family protein	WP_000512153.1	Not Essential
1843	b1796	chromosome	Protein_Coding	protein_coding	9	66.7	37	Neutral	yoaG	uncharacterized protein	WP_000513737.1	Not Essential
1844	b1797	chromosome	Protein_Coding	protein_coding	14	50	13.4286	Neutral	yeaR	DUF1971 family protein, nitrate-inducible	WP_000939317.1	Not Essential
1845	b1798	chromosome	Protein_Coding	protein_coding	43	37.2	24.25	Regional	leuE	leucine efflux protein	WP_000457206.1	Not Essential
1846	b1799	chromosome	Protein_Coding	protein_coding	36	52.8	22.5789	Neutral	dmlR	transcriptional activator of dmlA	WP_001061575.1	Not Essential
1847	b1800	chromosome	Protein_Coding	protein_coding	36	55.6	36.55	Neutral	dmlA	D-malate oxidase, NAD-dependent; putative tartrate dehydrogenase	WP_000978494.1	Not Essential
1848	b1801	chromosome	Protein_Coding	protein_coding	60	56.7	19.1471	Neutral	yeaV	putative transporter	WP_001301380.1	Not Essential
1849	b1802	chromosome	Protein_Coding	protein_coding	43	65.1	39.8214	Neutral	yeaW	putative YeaWX dioxygenase alpha subunit; 2Fe-2S cluster	WP_000067822.1	Not Essential
1850	b1803	chromosome	Protein_Coding	protein_coding	43	58.1	25.88	Neutral	yeaX	putative YeaWX dioxygenase beta subunit, reductase component	WP_001287026.1	Not Essential
1851	b1804	chromosome	Protein_Coding	protein_coding	40	27.5	13.4545	Neutral	rnd	ribonuclease D	WP_001109156.1	Not Essential
1852	b1805	chromosome	Protein_Coding	protein_coding	79	53.2	17.7619	Neutral	fadD	acyl-CoA synthetase (long-chain-fatty-acid--CoA ligase)	WP_000758422.1	Not Essential
1853	b1806	chromosome	Protein_Coding	protein_coding	29	58.6	19.6471	Neutral	yeaY	Slp family lipoprotein, RpoE-regulated	WP_000290576.1	Not Essential
1854	b1807	chromosome	Protein_Coding	protein_coding	26	3.8	36	Underrepresented	tsaB	tRNA(ANN) t(6)A37 threonylcarbamoyladenosine modification protein; binding partner and protease for TsaD	WP_001220966.1	Essential
1855	b1808	chromosome	Protein_Coding	protein_coding	62	64.5	27.625	Neutral	yoaA	putative ATP-dependent helicase, DinG family	WP_000128841.1	Not Essential
1856	b1809	chromosome	Protein_Coding	protein_coding	15	73.3	40	Neutral	yoaB	putative reactive intermediate deaminase	WP_001295493.1	Not Essential
1857	b1810	chromosome	Protein_Coding	protein_coding	15	53.3	18.5	Neutral	yoaC	DUF1889 family protein	WP_001111995.1	Not Essential
1858	b1811	chromosome	Protein_Coding	protein_coding	2	50	37	Neutral	yoaH	UPF0181 family protein	WP_000457334.1	Not Essential
1859	b1812	chromosome	Protein_Coding	protein_coding	64	64.1	21.3171	Neutral	pabB	aminodeoxychorismate synthase, subunit I	WP_000854958.1	Not Essential
1860	b1813	chromosome	Protein_Coding	protein_coding	26	53.8	58.7857	Neutral	nudL	putative CoA pyrophosphohydrolase, weak 3-phosphohydroxypyruvate phosphatase	WP_000456715.1	Not Essential
1861	b1814	chromosome	Protein_Coding	protein_coding	62	62.9	32.4103	Neutral	sdaA	L-serine dehydratase 1	WP_000624298.1	Not Essential
1862	b1815	chromosome	Protein_Coding	protein_coding	73	60.3	28.1364	Neutral	yoaD	putative membrane-anchored cyclic-di-GMP phosphodiesterase, regulator of cellulose production	WP_001295494.1	Not Essential
1863	b1816	chromosome	Protein_Coding	protein_coding	48	47.9	37.5652	Neutral	yoaE	putative membrane protein/conserved protein	WP_000394983.1	Not Essential
1864	b1817	chromosome	Protein_Coding	protein_coding	37	59.5	19	Neutral	manX	fused mannose-specific PTS enzymes: IIA component/IIB component	WP_000150543.1	Not Essential
1865	b1818	chromosome	Protein_Coding	protein_coding	43	48.8	39.2381	Neutral	manY	mannose-specific enzyme IIC component of PTS	WP_000406926.1	Not Essential
1866	b1819	chromosome	Protein_Coding	protein_coding	44	47.7	25.5238	Neutral	manZ	mannose-specific enzyme IID component of PTS	WP_000228655.1	Not Essential
1867	b1820	chromosome	Protein_Coding	protein_coding	24	50	15.9167	Regional	yobD	UPF0266 family inner membrane protein	WP_000156255.1	Not Essential
1868	b1821	chromosome	Protein_Coding	protein_coding	16	68.8	28.6364	Neutral	mntP	putative Mn(2+) efflux pump, mntR-regulated	WP_001296134.1	Not Essential
1869	b1822	chromosome	Protein_Coding	protein_coding	34	52.9	35.6667	Neutral	rlmA	23S rRNA m(1)G745 methyltransferase, SAM-dependent	WP_000010115.1	Not Essential
1870	b1823	chromosome	Protein_Coding	protein_coding	10	70	15	Neutral	cspC	stress protein, member of the CspA-family	WP_001062678.1	Not Essential
1871	b1824	chromosome	Protein_Coding	protein_coding	11	72.7	34.875	Neutral	yobF	DUF2527 family heat-induced protein	WP_001295496.1	Not Essential
1872	b1825	chromosome	Protein_Coding	protein_coding	10	50	14	Neutral	yebO	putative inner membrane protein	WP_001006866.1	Not Essential
1873	b1826	chromosome	Protein_Coding	protein_coding	4	0	0	Neutral	mgrB	regulatory peptide for PhoPQ, feedback inhibition	WP_000714550.1	Not Essential
1874	b4536	chromosome	Protein_Coding	protein_coding	18	61.1	25.7273	Neutral	yobH	uncharacterized protein	WP_001211011.1	Not Essential
1875	b1827	chromosome	Protein_Coding	protein_coding	40	50	35	Neutral	kdgR	KDG regulon transcriptional repressor	WP_001262203.1	Not Essential
1876	b1828	chromosome	Protein_Coding	protein_coding	63	54	30.0588	Neutral	yebQ	putative transporter	WP_001127216.1	Not Essential
1877	b1829	chromosome	Protein_Coding	protein_coding	28	64.3	39.4444	Neutral	htpX	putative endopeptidase	WP_000984520.1	Not Essential
1878	b1830	chromosome	Protein_Coding	protein_coding	86	14	9.91667	Underrepresented	prc	carboxy-terminal protease for penicillin-binding protein 3	WP_001055791.1	Not Essential
1879	b1831	chromosome	Protein_Coding	protein_coding	18	77.8	53	Neutral	proQ	RNA chaperone, putative ProP translation regulator	WP_000431381.1	Not Essential
1880	b1832	chromosome	Protein_Coding	protein_coding	20	70	44.8571	Neutral	msrC	free methionine-(R)-sulfoxide reductase	WP_001043877.1	Not Essential
1881	b1833	chromosome	Protein_Coding	protein_coding	67	58.2	22.5385	Neutral	yebS	inner membrane PqiA domain protein	WP_001207282.1	Not Essential
1882	b1834	chromosome	Protein_Coding	protein_coding	109	52.3	24.5263	Neutral	yebT	MCE domain protein	WP_001326728.1	Not Essential
1883	b1835	chromosome	Protein_Coding	protein_coding	51	43.1	46.5909	Regional	rsmF	16S rRNA m(5)C1407 methyltransferase, SAM-dependent	WP_001352260.1	Not Essential
1884	b1836	chromosome	Protein_Coding	protein_coding	12	83.3	42.8	Neutral	yebV	uncharacterized protein	WP_001295499.1	Not Essential
1885	b1837	chromosome	Protein_Coding	protein_coding	10	80	28.875	Neutral	yebW	uncharacterized protein	WP_000457842.1	Not Essential
1886	b1838	chromosome	Protein_Coding	protein_coding	26	76.9	41.05	Neutral	pphA	serine/threonine-specific protein phosphatase 1	WP_000812724.1	Not Essential
1887	b4432	chromosome	RNA	ncRNA	9	44.4	13.75	Neutral	ryeA	novel sRNA, function unknown	---	Not Essential
1888	b1839	chromosome	Protein_Coding	protein_coding	17	35.3	13.1667	Neutral	yebY	DUF2511 family protein	WP_000976476.1	Not Essential
1889	b1840	chromosome	Protein_Coding	protein_coding	30	70	28.1905	Neutral	yebZ	inner membrane protein	WP_000879289.1	Not Essential
1890	b1841	chromosome	Protein_Coding	protein_coding	13	69.2	15.4444	Neutral	yobA	CopC family protein	WP_000168747.1	Not Essential
1891	b1842	chromosome	Protein_Coding	protein_coding	10	70	24.5714	Neutral	holE	DNA polymerase III, theta subunit	WP_000916763.1	Not Essential
1892	b1843	chromosome	Protein_Coding	protein_coding	26	76.9	215.1	Neutral	yobB	C-N hydrolase family protein	WP_000011658.1	Not Essential
1893	b1844	chromosome	Protein_Coding	protein_coding	34	73.5	36.32	Neutral	exoX	exodeoxyribonuclease 10; DNA exonuclease X	WP_000944256.1	Not Essential
1894	b1845	chromosome	Protein_Coding	protein_coding	107	61.7	32.3939	Neutral	ptrB	protease II	WP_000936927.1	Not Essential
1895	b1846	chromosome	Protein_Coding	protein_coding	28	71.4	25.35	Neutral	yebE	DUF533 family inner membrane protein	WP_000024757.1	Not Essential
1896	b1847	chromosome	Protein_Coding	protein_coding	13	30.8	9.5	Neutral	yebF	extracellular Colicin M immunity family protein	WP_001350516.1	Not Essential
1897	b1848	chromosome	Protein_Coding	protein_coding	8	75	16.3333	Neutral	yebG	DNA damage-inducible protein regulated by LexA	WP_000257738.1	Not Essential
1898	b1849	chromosome	Protein_Coding	protein_coding	44	65.9	54.7586	Neutral	purT	phosphoribosylglycinamide formyltransferase 2	WP_000173484.1	Not Essential
1899	b1850	chromosome	Protein_Coding	protein_coding	23	17.4	22.25	Underrepresented	eda	KHG/KDPG aldolase; 2-dehydro-3-deoxy-phosphogluconate/4-hydroxy-2-oxoglutarate aldolase	WP_000800512.1	Not Essential
1900	b1851	chromosome	Protein_Coding	protein_coding	61	50.8	26.9032	Neutral	edd	6-phosphogluconate dehydratase	WP_001069467.1	Not Essential
1901	b1852	chromosome	Protein_Coding	protein_coding	54	3.7	1.5	Underrepresented	zwf	glucose-6-phosphate 1-dehydrogenase	WP_000301727.1	Not Essential
1902	b1853	chromosome	Protein_Coding	protein_coding	32	68.8	33.6818	Neutral	yebK	putative DNA-binding transcriptional regulator	WP_001056706.1	Not Essential
1903	b1854	chromosome	Protein_Coding	protein_coding	56	42.9	30.875	Neutral	pykA	pyruvate kinase II	WP_000091148.1	Not Essential
1904	b1855	chromosome	Protein_Coding	protein_coding	37	13.5	9.8	Underrepresented	lpxM	myristoyl-acyl carrier protein (ACP)-dependent acyltransferase	WP_000448381.1	Not Essential
1905	b1856	chromosome	Protein_Coding	protein_coding	58	53.4	32.5484	Neutral	mepM	murein DD-endopeptidase, space-maker hydrolase, septation protein	WP_001184045.1	Not Essential
1906	b1857	chromosome	Protein_Coding	protein_coding	37	54.1	11.25	Neutral	znuA	zinc ABC transporter periplasmic binding protein	WP_001300644.1	Not Essential
1907	b1858	chromosome	Protein_Coding	protein_coding	33	72.7	34.0833	Neutral	znuC	zinc ABC transporter ATPase	WP_000202996.1	Not Essential
1908	b1859	chromosome	Protein_Coding	protein_coding	34	76.5	37.3846	Neutral	znuB	zinc ABC transporter permease	WP_000571480.1	Not Essential
1909	b1860	chromosome	Protein_Coding	protein_coding	35	8.6	10.6667	Underrepresented	ruvB	ATP-dependent DNA helicase, component of RuvABC resolvasome	WP_000568519.1	Not Essential
1910	b1861	chromosome	Protein_Coding	protein_coding	19	0	0	Underrepresented	ruvA	component of RuvABC resolvasome, regulatory subunit	WP_000580323.1	Not Essential
1911	b4677	chromosome	Protein_Coding	protein_coding	11	0	0	Underrepresented	yobI	uncharacterized protein	WP_010723105.1	Not Essential
1912	b1862	chromosome	Protein_Coding	protein_coding	37	40.5	14.1333	Regional	yebB	DUF830 family protein	WP_001024932.1	Not Essential
1913	b1863	chromosome	Protein_Coding	protein_coding	21	4.8	3	Underrepresented	ruvC	component of RuvABC resolvasome, endonuclease	WP_001295503.1	Not Essential
1914	b1864	chromosome	Protein_Coding	protein_coding	27	63	37.6471	Neutral	yebC	UPF0082 family protein	WP_000907248.1	Not Essential
1915	b1865	chromosome	Protein_Coding	protein_coding	18	44.4	12.375	Neutral	nudB	dihydroneopterin triphosphate pyrophosphatase	WP_001300367.1	Not Essential
1916	b1866	chromosome	Protein_Coding	protein_coding	61	1.6	3	Underrepresented	aspS	aspartyl-tRNA synthetase	WP_001258678.1	Essential
1917	b1867	chromosome	Protein_Coding	protein_coding	28	53.6	44.6667	Neutral	yecD	isochorismatase family protein	WP_000891621.1	Not Essential
1918	b1868	chromosome	Protein_Coding	protein_coding	35	65.7	36.7826	Neutral	yecE	UPF0759 family protein	WP_000639274.1	Not Essential
1919	b1869	chromosome	Protein_Coding	protein_coding	19	73.7	22.6429	Neutral	yecN	MAPEG family inner membrane protein	WP_000252980.1	Not Essential
1920	b1870	chromosome	Protein_Coding	protein_coding	32	31.2	23.4	Regional	cmoA	carboxy-SAM synthase	WP_000019590.1	Not Essential
1921	b1871	chromosome	Protein_Coding	protein_coding	38	52.6	22.35	Neutral	cmoB	tRNA (cmo5U34)-carboxymethyltransferase, carboxy-SAM-dependent	WP_000564725.1	Not Essential
1922	b1872	chromosome	Protein_Coding	protein_coding	108	55.6	34.0667	Neutral	torZ	trimethylamine N-oxide reductase system III, catalytic subunit	WP_000176781.1	Not Essential
1923	b1873	chromosome	Protein_Coding	protein_coding	58	37.9	35.7273	Regional	torY	TMAO reductase III (TorYZ), cytochrome c-type subunit	WP_001214331.1	Not Essential
1924	b1874	chromosome	Protein_Coding	protein_coding	29	48.3	15.2857	Neutral	cutC	copper homeostasis protein	WP_001185741.1	Not Essential
1925	b1875	chromosome	Protein_Coding	protein_coding	19	42.1	42	Neutral	yecM	putative metal-binding enzyme	WP_001326725.1	Not Essential
1926	b1876	chromosome	Protein_Coding	protein_coding	63	0	0	Underrepresented	argS	arginyl-tRNA synthetase	WP_001025322.1	Essential
1927	b1877	chromosome	Protein_Coding	protein_coding	36	50	19.3889	Neutral	yecT	uncharacterized protein	WP_001299676.1	Not Essential
1928	b1878	chromosome	Protein_Coding	protein_coding	21	23.8	42.8	Regional	flhE	proton seal during flagellar secretion	WP_001259583.1	Not Essential
1929	b1879	chromosome	Protein_Coding	protein_coding	67	56.7	32	Neutral	flhA	putative flagellar export pore protein	WP_000066951.1	Not Essential
1930	b1880	chromosome	Protein_Coding	protein_coding	33	51.5	26.7647	Neutral	flhB	flagellin export apparatus, substrate specificity protein	WP_001278954.1	Not Essential
1931	b1881	chromosome	Protein_Coding	protein_coding	17	70.6	70.8333	Neutral	cheZ	chemotaxis regulator, protein phosphatase for CheY	WP_000983609.1	Not Essential
1932	b1882	chromosome	Protein_Coding	protein_coding	12	41.7	5.2	Neutral	cheY	chemotaxis regulator transmitting signal to flagellar motor component	WP_000763867.1	Not Essential
1933	b1883	chromosome	Protein_Coding	protein_coding	34	50	40.9412	Neutral	cheB	fused chemotaxis regulator: protein-glutamate methylesterase in two-component regulatory system with CheA	WP_000036361.1	Not Essential
1934	b1884	chromosome	Protein_Coding	protein_coding	30	46.7	28.7857	Neutral	cheR	chemotaxis regulator, protein-glutamate methyltransferase	WP_000204337.1	Not Essential
1935	b1885	chromosome	Protein_Coding	protein_coding	50	64	36.5938	Neutral	tap	methyl-accepting protein IV	WP_000483239.1	Not Essential
1936	b1886	chromosome	Protein_Coding	protein_coding	61	54.1	21.6364	Neutral	tar	methyl-accepting chemotaxis protein II	WP_001297437.1	Not Essential
1937	b1887	chromosome	Protein_Coding	protein_coding	22	81.8	32.3333	Neutral	cheW	purine-binding chemotaxis protein	WP_000147302.1	Not Essential
1938	b1888	chromosome	Protein_Coding	protein_coding	59	54.2	25.9688	Neutral	cheA	fused chemotactic sensory histidine kinase in two-component regulatory system with CheB and CheY: sensory histidine kinase/signal sensing protein	WP_001350517.1	Not Essential
1939	b1889	chromosome	Protein_Coding	protein_coding	30	86.7	22.1923	Neutral	motB	protein that enables flagellar motor rotation	WP_000795630.1	Not Essential
1940	b1890	chromosome	Protein_Coding	protein_coding	35	57.1	36.05	Neutral	motA	proton conductor component of flagella motor	WP_000906340.1	Not Essential
1941	b1891	chromosome	Protein_Coding	protein_coding	23	56.5	14.3846	Neutral	flhC	flagellar class II regulon transcriptional activator, with FlhD	WP_001291603.1	Not Essential
1942	b1892	chromosome	Protein_Coding	protein_coding	12	66.7	44.5	Neutral	flhD	flagellar class II regulon transcriptional activator, with FlhC	WP_001295647.1	Not Essential
1943	b1893	chromosome	Protein_Coding	protein_coding	18	94.4	24.7059	Neutral	insB1	IS1 transposase B	WP_001119362.1	Not Essential
1944	b1894	chromosome	Protein_Coding	protein_coding	12	66.7	15.875	Neutral	insA	IS1 repressor TnpA	WP_000179213.1	Not Essential
1945	b1895	chromosome	Protein_Coding	protein_coding	25	64	27.875	Neutral	uspC	universal stress protein	WP_000122416.1	Not Essential
1946	b1896	chromosome	Protein_Coding	protein_coding	64	68.8	26.2045	Neutral	otsA	trehalose-6-phosphate synthase	WP_001295646.1	Not Essential
1947	b1897	chromosome	Protein_Coding	protein_coding	37	59.5	46.9091	Neutral	otsB	trehalose-6-phosphate phosphatase, biosynthetic	WP_001295645.1	Not Essential
1948	b4460	chromosome	Protein_Coding	protein_coding	38	68.4	26.1538	Neutral	araH	L-arabinose ABC transporter permease	WP_000100205.1	Not Essential
1949	b1900	chromosome	Protein_Coding	protein_coding	65	66.2	34.2558	Neutral	araG	L-arabinose ABC transporter ATPase	WP_001187819.1	Not Essential
1950	b1901	chromosome	Protein_Coding	protein_coding	47	53.2	28.08	Neutral	araF	L-arabinose ABC transporter periplasmic binding protein	WP_000548675.1	Not Essential
1951	b1902	chromosome	Protein_Coding	protein_coding	13	76.9	40.5	Neutral	ftnB	ferritin B, putative ferrous iron reservoir	WP_000179469.1	Not Essential
1952	b4537	chromosome	Protein_Coding	protein_coding	8	37.5	13	Neutral	yecJ	DUF2766 family protein	WP_000082127.1	Not Essential
1953	b4663	chromosome	Protein_Coding	protein_coding	6	50	18.6667	Neutral	azuC	acid-inducible small membrane-associated protein	WP_010723106.1	Not Essential
1954	b1904	chromosome	Protein_Coding	protein_coding	18	72.2	27.3077	Neutral	yecR	lipoprotein, function unknown	WP_001237869.1	Not Essential
1955	b1905	chromosome	Protein_Coding	protein_coding	28	53.6	19.7333	Neutral	ftnA	ferritin iron storage protein (cytoplasmic)	WP_000917208.1	Not Essential
1956	b1906	chromosome	Protein_Coding	protein_coding	10	70	34.5714	Neutral	yecH	DUF2492 family protein	WP_000377225.1	Not Essential
1957	b1907	chromosome	Protein_Coding	protein_coding	57	45.6	37.7308	Regional	tyrP	tyrosine transporter	WP_000797560.1	Not Essential
1958	b1908	chromosome	Protein_Coding	protein_coding	23	60.9	49.9286	Neutral	yecA	UPF0149 family protein	WP_000847902.1	Not Essential
1959	b1909	chromosome	RNA	tRNA	3	0	0	Underrepresented	leuZ	tRNA-Leu	---	Essential
1960	b1910	chromosome	RNA	tRNA	4	0	0	Underrepresented	cysT	tRNA-Cys	---	Essential
1961	b1911	chromosome	RNA	tRNA	2	100	11	Underrepresented	glyW	tRNA-Gly	---	Not Essential
1962	b1912	chromosome	Protein_Coding	protein_coding	23	0	0	Underrepresented	pgsA	phosphatidylglycerophosphate synthetase	WP_001160187.1	Essential
1963	b1913	chromosome	Protein_Coding	protein_coding	75	57.3	43.6744	Neutral	uvrC	excinuclease UvrABC, endonuclease subunit	WP_001283421.1	Not Essential
1964	b1914	chromosome	Protein_Coding	protein_coding	25	84	26.7619	Neutral	uvrY	response regulator in two-component regulatory system with BarA	WP_000611335.1	Not Essential
1965	b1915	chromosome	Protein_Coding	protein_coding	9	55.6	27	Neutral	yecF	DUF2594 family protein	WP_000106474.1	Not Essential
1966	b1916	chromosome	Protein_Coding	protein_coding	34	79.4	24.4074	Neutral	sdiA	quorum-sensing transcriptional activator	WP_001152715.1	Not Essential
1967	b1917	chromosome	Protein_Coding	protein_coding	19	73.7	31.5714	Neutral	yecC	putative ABC transporter ATPase	WP_001272991.1	Not Essential
1968	b1918	chromosome	Protein_Coding	protein_coding	32	87.5	28.4286	Neutral	yecS	ABC family putative inner membrane permease	WP_001158220.1	Not Essential
1969	b1919	chromosome	Protein_Coding	protein_coding	36	55.6	26.4	Neutral	dcyD	D-cysteine desulfhydrase, PLP-dependent	WP_001128215.1	Not Essential
1970	b1920	chromosome	Protein_Coding	protein_coding	29	65.5	35.5263	Neutral	fliY	cystine transporter subunit	WP_001296168.1	Not Essential
1971	b1921	chromosome	Protein_Coding	protein_coding	27	81.5	27.5455	Neutral	fliZ	RpoS antagonist; putative regulator of FliA activity	WP_001350518.1	Not Essential
1972	b1922	chromosome	Protein_Coding	protein_coding	38	71.1	49.4444	Neutral	fliA	RNA polymerase, sigma 28 (sigma F) factor	WP_001087467.1	Not Essential
1973	b1923	chromosome	Protein_Coding	protein_coding	93	76.3	23.0845	Neutral	fliC	flagellar filament structural protein (flagellin)	WP_000079739.1	Not Essential
1974	b1924	chromosome	Protein_Coding	protein_coding	62	59.7	36.4595	Neutral	fliD	flagellar filament capping protein	WP_000146784.1	Not Essential
1975	b1925	chromosome	Protein_Coding	protein_coding	15	93.3	23.2857	Neutral	fliS	flagellar protein potentiates polymerization	WP_000270671.1	Not Essential
1976	b1926	chromosome	Protein_Coding	protein_coding	10	80	31	Neutral	fliT	putative flagellar synthesis and assembly chaperone	WP_001015033.1	Not Essential
1977	b1927	chromosome	Protein_Coding	protein_coding	72	73.6	50.0189	Neutral	amyA	cytoplasmic alpha-amylase	WP_001245695.1	Not Essential
1978	b1928	chromosome	Protein_Coding	protein_coding	17	76.5	26.2308	Neutral	yedD	lipoprotein	WP_001350519.1	Not Essential
1979	b1929	chromosome	Protein_Coding	protein_coding	40	60	33.6667	Neutral	yedE	UPF0394 family sulphur transport domain-containing inner membrane protein	WP_000118897.1	Not Essential
1980	b1930	chromosome	Protein_Coding	protein_coding	14	42.9	16.5	Neutral	yedF	putative TusA family sulfurtransferase	WP_000790504.1	Not Essential
1981	b1931	chromosome	Protein_Coding	protein_coding	27	59.3	29.75	Neutral	yedK	DUF159 family protein	WP_000334583.1	Not Essential
1982	b1932	chromosome	Protein_Coding	protein_coding	21	47.6	13.7	Regional	yedL	GNAT family putative N-acetyltransferase	WP_000494172.1	Not Essential
1983	b4495	chromosome	Pseudogene	pseudogene	103	8.7	4.11111	Underrepresented	yedN	---	---	Not Essential
1984	b1936	chromosome	Pseudogene	pseudogene	6	50	44	Neutral	intG	---	---	Not Essential
1985	b1937	chromosome	Protein_Coding	protein_coding	14	64.3	33.8889	Neutral	fliE	flagellar basal-body component	WP_001274299.1	Not Essential
1986	b1938	chromosome	Protein_Coding	protein_coding	57	61.4	30.6286	Neutral	fliF	flagellar basal-body MS-ring and collar protein	WP_000994427.1	Not Essential
1987	b1939	chromosome	Protein_Coding	protein_coding	22	68.2	41.9333	Neutral	fliG	flagellar motor switching and energizing component	WP_000067950.1	Not Essential
1988	b1940	chromosome	Protein_Coding	protein_coding	17	70.6	39.6667	Neutral	fliH	negative regulator of FliI ATPase activity	WP_001282683.1	Not Essential
1989	b1941	chromosome	Protein_Coding	protein_coding	44	45.5	33.45	Neutral	fliI	flagellum-specific ATP synthase	WP_000213294.1	Not Essential
1990	b1942	chromosome	Protein_Coding	protein_coding	10	60	37.6667	Neutral	fliJ	flagellar protein	WP_000807579.1	Not Essential
1991	b1943	chromosome	Protein_Coding	protein_coding	29	65.5	25.8421	Neutral	fliK	flagellar hook-length control protein	WP_000620071.1	Not Essential
1992	b1944	chromosome	Protein_Coding	protein_coding	22	63.6	23.0714	Neutral	fliL	flagellar biosynthesis protein	WP_000133106.1	Not Essential
1993	b1945	chromosome	Protein_Coding	protein_coding	39	59	18.2174	Neutral	fliM	flagellar motor switching and energizing component	WP_001350520.1	Not Essential
1994	b1946	chromosome	Protein_Coding	protein_coding	13	46.2	42.5	Neutral	fliN	flagellar motor switching and energizing component	WP_001282101.1	Not Essential
1995	b1947	chromosome	Protein_Coding	protein_coding	12	33.3	15.5	Neutral	fliO	flagellar biosynthesis protein	WP_001302429.1	Not Essential
1996	b1948	chromosome	Protein_Coding	protein_coding	26	73.1	31.1053	Neutral	fliP	flagellar biosynthesis protein	WP_001253441.1	Not Essential
1997	b1949	chromosome	Protein_Coding	protein_coding	15	66.7	36.1	Neutral	fliQ	flagellar biosynthesis protein	WP_000187358.1	Not Essential
1998	b1950	chromosome	Protein_Coding	protein_coding	39	51.3	34.1	Regional	fliR	flagellar export pore protein	WP_000942319.1	Not Essential
[truncated: 2,485 more rows]
